# Supplementary material for: Development of TsDPEN based imine-containing ligands for the copper-catalysed asymmetric Kinugasa reaction
Source: Royal Society of Chemistry journal article supplement (doi:10.1039/d0ra03276j), 2020-01-01

Electronic Supplementary Information for:

## **Development of TsDPEN based Imine-containing Ligands for the Copper-Catalyzed Asymmetric Kinugasa Reaction**

Chuanlong Xu<sup>†</sup>, Yuchen Yang<sup>†</sup>, Yue Wu, Feilong He, Huakang He, Ping Deng\*, Hui Zhou\*

*hzhou@cqmu.edu.cn; orangedp@cqmu.edu.cn*

*College of Pharmacy, Chongqing Medical University, Chongqing, China*

### **CONTENTS :**

|                                                           |     |
|-----------------------------------------------------------|-----|
| 1. Detailed results for Figure 2. ....                    | S2  |
| 2. The structure of the Cu complex optimized by DFT. .... | S3  |
| 3. Copies of HPLC charts ....                             | S11 |
| 4. Copies of NMR spectra ....                             | S30 |

## 1. Detailed results for Figure 2.

|                                    |                     | <b>L1</b> | <b>L2</b> | <b>L3a</b> | <b>L3b</b> | <b>L3c</b> | <b>L3d</b> |
|------------------------------------|---------------------|-----------|-----------|------------|------------|------------|------------|
| Cu(OAc) <sub>2</sub>               | Yield (%)           | N.R.      | 16        | 88         | 97         | 86         | 80         |
|                                    | <i>cis/trans</i>    | -         | 32.3:1    | 5.7:1      | 5.7:1      | 5.7:1      | 4.6:1      |
|                                    | <i>ee (cis)</i> (%) | -         | 9         | 81         | 83         | 78         | 78         |
| Cu(OTf) <sub>2</sub>               | Yield (%)           | 26        | 17        |            | 90         |            |            |
|                                    | <i>cis/trans</i>    | 6.7:1     | 15.7:1    |            | 5.3:1      |            |            |
|                                    | <i>ee (cis)</i> (%) | 39        | 27        |            | 82         |            |            |
| Cu(ClO <sub>4</sub> ) <sub>2</sub> | Yield (%)           | 13        | 69        |            | 91         |            |            |
|                                    | <i>cis/trans</i>    | 8.1:1     | 6.1:1     |            | 5.3:1      |            |            |
|                                    | <i>ee (cis)</i> (%) | 15        | 35        |            | 82         |            |            |
| CuSO <sub>4</sub>                  | Yield (%)           | N.R.      | 16        |            | 47         |            |            |
|                                    | <i>cis/trans</i>    | -         | 19:1      |            | 5.3:1      |            |            |
|                                    | <i>ee (cis)</i> (%) | -         | 22        |            | 82         |            |            |
| CuOAc                              | Yield (%)           | N.R.      | 30        |            | 94         |            |            |
|                                    | <i>cis/trans</i>    | -         | 6.1:1     |            | 5.7:1      |            |            |
|                                    | <i>ee (cis)</i> (%) | -         | 10        |            | 82         |            |            |
| CuOTf                              | Yield (%)           | 34        | 31        |            | 27         |            |            |
|                                    | <i>cis/trans</i>    | 5.7:1     | 19:1      |            | 8.1:1      |            |            |
|                                    | <i>ee (cis)</i> (%) | 24        | 36        |            | 24         |            |            |
| CuI                                | Yield (%)           | 97        | 95        |            | 90         |            |            |
|                                    | <i>cis/trans</i>    | 4.9:1     | 5.3:1     |            | 4.3:1      |            |            |
|                                    | <i>ee (cis)</i> (%) | 0         | 6         |            | 54         |            |            |

## 2. The structure of the Cu complex optimized by DFT.

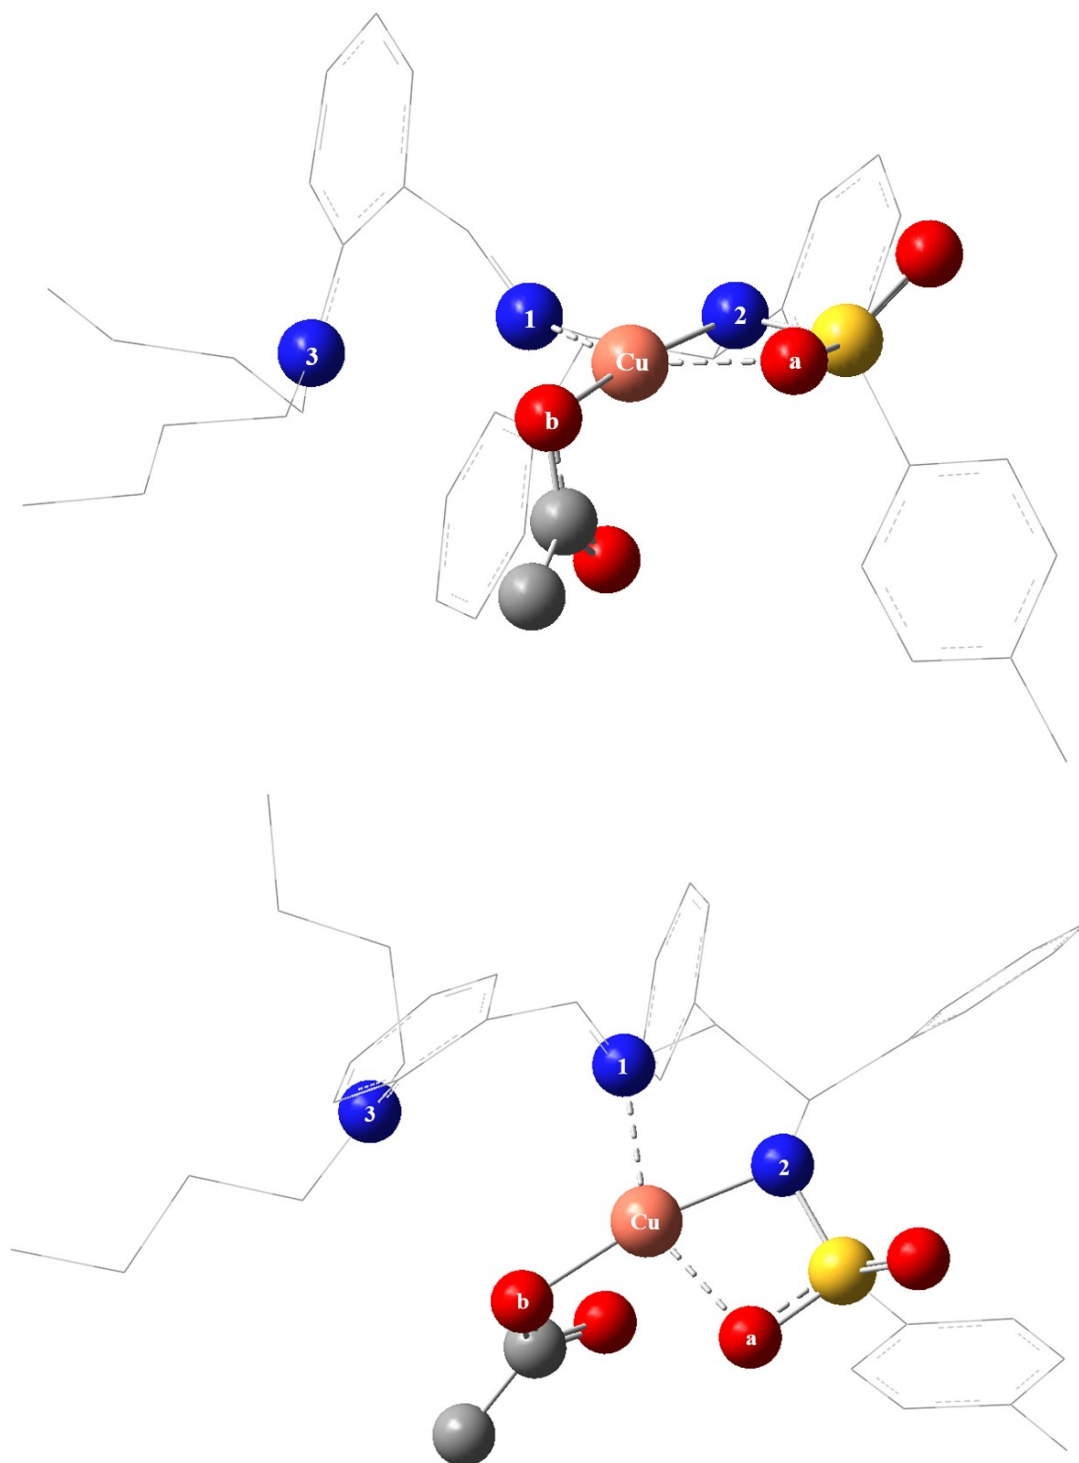

**Figure S1.** The geometry of Cu/L3b optimized by density functional theory (DFT)

**Computational Methods:** DFT calculations were carried out using the Gaussian 09 software package<sup>[1]</sup>. Considering both the desired precision of structures and available

computer resources, the geometry optimizations were performed using the Becke's three-parameter nonlocal exchange function<sup>[2]</sup> and the Lee, Yang, and Parr nonlocal correlation function (LYP)<sup>[3]</sup> at a mixed basis set level. The SDD basis set with the associated effective core potential was used for Cu, while the 6-31G(d) basis set<sup>[4]</sup> was used for all other atoms (C, H, O, N, S). The final optimized structure of Cu complex was obtained with no imaginary frequencies, which indicates that it is a stable structure. B3LYP energy of this structure is -2535.028607 a.u. after adding the zero-point correction.

### Selected bond length (nm)

| Cu-N <sub>1</sub> | Cu-N <sub>2</sub> | Cu-N <sub>3</sub> | Cu-O <sub>a</sub> | Cu-O <sub>b</sub> |
|-------------------|-------------------|-------------------|-------------------|-------------------|
| 0.2124            | 0.1932            | 0.3925            | 0.2196            | 0.1938            |

### Frequencies for the final optimized structure of Cu complex

| Numbers | Frequencies | Numbers | Frequencies | Numbers | Frequencies |
|---------|-------------|---------|-------------|---------|-------------|
| 1       | 11.14       | 91      | 756.44      | 181     | 1394.10     |
| 2       | 13.22       | 92      | 761.65      | 182     | 1395.47     |
| 3       | 5.48        | 93      | 769.91      | 183     | 1398.38     |
| 4       | 23.25       | 94      | 779.00      | 184     | 1400.68     |
| 5       | 26.10       | 95      | 799.82      | 185     | 1403.91     |
| 6       | 28.92       | 96      | 804.20      | 186     | 1419.13     |
| 7       | 33.30       | 97      | 820.81      | 187     | 1423.78     |
| 8       | 35.58       | 98      | 829.46      | 188     | 1442.07     |
| 9       | 37.00       | 99      | 836.32      | 189     | 1442.80     |
| 10      | 38.12       | 100     | 851.27      | 190     | 1443.87     |
| 11      | 43.83       | 101     | 854.67      | 191     | 1446.64     |
| 12      | 44.89       | 102     | 862.79      | 192     | 1447.88     |
| 13      | 48.40       | 103     | 867.37      | 193     | 1448.25     |
| 14      | 53.97       | 104     | 868.68      | 194     | 1461.04     |

[1] M. J. Frisch, G. W. , H. B. Schlegel, G. E. Scuseria, M. A. Robb, J. R. Cheeseman, G. Scalmani, V. Barone, B. Mennucci, G. A. Petersson, H. Nakatsuji, M. Caricato, X. Li, H. P. Hratchian, A. F. Izmaylov, J. Bloino, G. Zheng, J. L. Sonnenberg, M. Hada, M. Ehara, K. Toyota, R. Fukuda, J. Hasegawa, M. Ishida, T. Nakajima, Y. Honda, O. Kitao, H. Nakai, T. Vreven, J. A. Montgomery, Jr., J. E. Peralta, F. Ogliaro, M. Bearpark, J. J. Heyd, E. Brothers, K. N. Kudin, V. N. Staroverov, R. Kobayashi, J. Normand, K. Raghavachari, A. Rendell, J. C. Burant, S. S. Iyengar, J. Tomasi, M. Cossi, N. Rega, J. M. Millam, M. Klene, J. E. Knox, J. B. Cross, V. Bakken, C. Adamo, J. Jaramillo, R. Gomperts, R. E. Stratmann, O. Yazyev, A. J. Austin, R. Cammi, C. Pomelli, J. W. Ochterski, R. L. Martin, K. Morokuma, V. G. Zakrzewski, G. A. Voth, P. Salvador, J. J. Dannenberg, S. Dapprich, A. D. Daniels, Ö. Farkas, J. B. Foresman, J. V. Ortiz, J. Cioslowski, and D. J. Fox. Gaussian 09, revision D.01; Gaussian, Inc.: Wallingford, CT, 2009.

[2] W. Kohn, A. D. Becke, R. G. Parr, *J. Phys. Chem.* **1996**, *100*, 12974-12980.

[3] C. Lee, W. Yang, R. G. Parr, *Phys. Rev. B* **1988**, *37*, 785.

[4] P. C. Hariharan, J. A. Pople, *Theoretica. Chimica. Acta.* **1973**, *28*, 213-222.

|    |        |     |         |     |         |
|----|--------|-----|---------|-----|---------|
| 15 | 57.85  | 105 | 870.51  | 195 | 1493.53 |
| 16 | 62.64  | 106 | 876.25  | 196 | 1501.62 |
| 17 | 66.40  | 107 | 897.03  | 197 | 1501.83 |
| 18 | 70.40  | 108 | 917.00  | 198 | 1502.91 |
| 19 | 73.06  | 109 | 929.46  | 199 | 1507.87 |
| 20 | 76.52  | 110 | 937.24  | 200 | 1510.48 |
| 21 | 80.61  | 111 | 942.20  | 201 | 1516.36 |
| 22 | 89.89  | 112 | 943.26  | 202 | 1517.93 |
| 23 | 96.66  | 113 | 946.46  | 203 | 1520.15 |
| 24 | 100.65 | 114 | 960.53  | 204 | 1521.70 |
| 25 | 106.02 | 115 | 972.78  | 205 | 1522.46 |
| 26 | 118.23 | 116 | 977.66  | 206 | 1527.41 |
| 27 | 132.74 | 117 | 980.41  | 207 | 1530.41 |
| 28 | 141.01 | 118 | 982.26  | 208 | 1531.85 |
| 29 | 150.19 | 119 | 989.53  | 209 | 1536.60 |
| 30 | 151.28 | 120 | 992.51  | 210 | 1538.63 |
| 31 | 162.14 | 121 | 996.69  | 211 | 1542.95 |
| 32 | 164.18 | 122 | 1000.06 | 212 | 1545.07 |
| 33 | 183.17 | 123 | 1001.54 | 213 | 1545.20 |
| 34 | 187.87 | 124 | 1003.64 | 214 | 1546.99 |
| 35 | 203.47 | 125 | 1007.93 | 215 | 1558.98 |
| 36 | 206.76 | 126 | 1016.18 | 216 | 1599.62 |
| 37 | 216.12 | 127 | 1017.84 | 217 | 1627.12 |
| 38 | 220.09 | 128 | 1021.61 | 218 | 1638.87 |
| 39 | 232.30 | 129 | 1033.16 | 219 | 1643.11 |
| 40 | 242.10 | 130 | 1034.52 | 220 | 1643.58 |
| 41 | 245.98 | 131 | 1038.06 | 221 | 1655.81 |
| 42 | 253.28 | 132 | 1039.15 | 222 | 1660.58 |
| 43 | 257.00 | 133 | 1041.75 | 223 | 1661.73 |
| 44 | 257.47 | 134 | 1057.19 | 224 | 1661.77 |
| 45 | 274.31 | 135 | 1061.28 | 225 | 1668.20 |
| 46 | 278.72 | 136 | 1063.43 | 226 | 3019.13 |
| 47 | 301.59 | 137 | 1068.06 | 227 | 3024.71 |
| 48 | 315.66 | 138 | 1074.99 | 228 | 3028.07 |
| 49 | 316.45 | 139 | 1077.32 | 229 | 3039.33 |

|    |        |     |         |     |         |
|----|--------|-----|---------|-----|---------|
| 50 | 325.14 | 140 | 1086.97 | 230 | 3041.14 |
| 51 | 340.34 | 141 | 1106.83 | 231 | 3042.08 |
| 52 | 356.04 | 142 | 1110.77 | 232 | 3044.12 |
| 53 | 360.70 | 143 | 1119.07 | 233 | 3044.90 |
| 54 | 375.48 | 144 | 1127.33 | 234 | 3045.68 |
| 55 | 391.99 | 145 | 1137.68 | 235 | 3049.58 |
| 56 | 410.98 | 146 | 1144.11 | 236 | 3049.62 |
| 57 | 416.21 | 147 | 1153.09 | 237 | 3056.95 |
| 58 | 417.74 | 148 | 1154.71 | 238 | 3065.01 |
| 59 | 419.71 | 149 | 1155.71 | 239 | 3068.19 |
| 60 | 425.84 | 150 | 1192.06 | 240 | 3072.55 |
| 61 | 439.03 | 151 | 1193.59 | 241 | 3079.59 |
| 62 | 446.77 | 152 | 1194.28 | 242 | 3089.77 |
| 63 | 469.27 | 153 | 1200.58 | 243 | 3101.91 |
| 64 | 479.63 | 154 | 1209.47 | 244 | 3107.26 |
| 65 | 490.61 | 155 | 1215.89 | 245 | 3109.00 |
| 66 | 501.98 | 156 | 1219.24 | 246 | 3110.65 |
| 67 | 512.58 | 157 | 1220.71 | 247 | 3112.41 |
| 68 | 517.59 | 158 | 1224.70 | 248 | 3114.49 |
| 69 | 538.56 | 159 | 1226.10 | 249 | 3126.88 |
| 70 | 543.31 | 160 | 1234.10 | 250 | 3128.69 |
| 71 | 564.78 | 161 | 1240.02 | 251 | 3131.18 |
| 72 | 573.51 | 162 | 1259.17 | 252 | 3165.69 |
| 73 | 586.70 | 163 | 1264.66 | 253 | 3175.70 |
| 74 | 608.08 | 164 | 1270.69 | 254 | 3179.91 |
| 75 | 616.27 | 165 | 1276.61 | 255 | 3180.39 |
| 76 | 623.38 | 166 | 1297.26 | 256 | 3184.47 |
| 77 | 630.90 | 167 | 1305.95 | 257 | 3188.67 |
| 78 | 636.71 | 168 | 1320.33 | 258 | 3189.30 |
| 79 | 637.50 | 169 | 1326.07 | 259 | 3190.32 |
| 80 | 647.59 | 170 | 1329.46 | 260 | 3191.85 |
| 81 | 654.44 | 171 | 1341.05 | 261 | 3192.17 |
| 82 | 673.38 | 172 | 1342.47 | 262 | 3197.91 |
| 83 | 694.73 | 173 | 1345.96 | 263 | 3200.67 |
| 84 | 711.06 | 174 | 1347.31 | 264 | 3208.64 |

|    |        |     |         |     |         |
|----|--------|-----|---------|-----|---------|
| 85 | 713.43 | 175 | 1356.87 | 265 | 3211.08 |
| 86 | 716.24 | 176 | 1364.65 | 266 | 3216.95 |
| 87 | 719.12 | 177 | 1365.66 | 267 | 3220.07 |
| 88 | 724.31 | 178 | 1369.63 | 268 | 3222.42 |
| 89 | 742.95 | 179 | 1373.62 | 269 | 3236.96 |
| 90 | 751.70 | 180 | 1380.11 | 270 | 3244.79 |

### Computed energies for the final optimized structure of Cu complex

| Energies                                    | Absolute Energy Values (a.u.) |
|---------------------------------------------|-------------------------------|
| Zero-point correction                       | 0.764186                      |
| Thermal correction to Energy                | 0.812414                      |
| Thermal correction to Enthalpy              | 0.813358                      |
| Thermal correction to Gibbs Free Energy     | 0.673572                      |
| Sum of electronic and zero-point Energies   | -2535.028607                  |
| Sum of electronic and thermal Energies      | -2534.980379                  |
| Sum of electronic and thermal Enthalpies    | -2534.979435                  |
| Sum of electronic and thermal Free Energies | -2535.119221                  |

### Cartesian coordinates for the final optimized structure of Cu complex

| Atoms | Coordinates (Angstroms) |             |             |
|-------|-------------------------|-------------|-------------|
|       | X                       | Y           | Z           |
| C     | 0.72384500              | 1.70172900  | -0.03469100 |
| C     | 2.05864700              | 0.89985200  | 0.25049600  |
| N     | -0.45956500             | 0.93882400  | 0.44342400  |
| C     | 3.17853000              | 1.85878400  | 0.63707900  |
| C     | 0.57980000              | 2.05582400  | -1.50652500 |
| N     | 1.71298900              | -0.08121500 | 1.27418400  |
| C     | -1.29611600             | 1.59599500  | 1.17539400  |
| C     | -2.51150800             | 1.12231300  | 1.83363600  |
| C     | -2.63287600             | 1.62560600  | 3.15276200  |
| C     | -3.56102500             | 1.13800300  | 4.05283300  |
| C     | -4.42915000             | 0.12732200  | 3.61655900  |
| C     | -4.40194700             | -0.31905000 | 2.30695000  |
| C     | -3.48561700             | 0.19047500  | 1.34478300  |
| N     | -3.62645400             | -0.17491400 | 0.02108100  |
| C     | 0.41293500              | 1.05492800  | -2.47823000 |

|   |             |             |             |
|---|-------------|-------------|-------------|
| C | 0.28447600  | 1.39834400  | -3.82414500 |
| C | 0.32710000  | 2.73859900  | -4.22004800 |
| C | 0.49715100  | 3.73669700  | -3.26054200 |
| C | 0.61964900  | 3.39497900  | -1.91109500 |
| C | 3.39302800  | 2.22320700  | 1.97293700  |
| C | 4.39091200  | 3.14209500  | 2.30124200  |
| C | 5.18245500  | 3.71144600  | 1.30102700  |
| C | 4.97666000  | 3.34962700  | -0.03181800 |
| C | 3.98312000  | 2.42563400  | -0.36020800 |
| C | -4.28008200 | -1.44103800 | -0.32764700 |
| C | -5.76299300 | -1.33290800 | -0.71887500 |
| C | -6.36678200 | -2.69630100 | -1.08330300 |
| C | -7.83910600 | -2.60925500 | -1.49891100 |
| C | -3.13273300 | 0.61542500  | -1.11362100 |
| C | -3.55790500 | 2.09221800  | -1.14623500 |
| C | -5.07075700 | 2.33000200  | -1.23818100 |
| C | -5.43115200 | 3.81766300  | -1.31189200 |
| S | 2.65667300  | -1.35328600 | 1.69262000  |
| O | 1.57902700  | -2.41552800 | 1.76977800  |
| O | 3.47403700  | -1.12830600 | 2.88877500  |
| C | 3.77203100  | -1.79861500 | 0.35879300  |
| C | 3.27990400  | -2.40586400 | -0.80123000 |
| C | 4.17548800  | -2.72269900 | -1.82181800 |
| C | 5.54614100  | -2.44964500 | -1.70477100 |
| C | 6.00665200  | -1.83578800 | -0.53118600 |
| C | 5.13100000  | -1.50731600 | 0.50148300  |
| C | 6.50779800  | -2.83362100 | -2.80431100 |
| H | 0.77814700  | 2.63466700  | 0.53948200  |
| H | 2.34985400  | 0.40299000  | -0.68563900 |
| H | -1.03422600 | 2.63231700  | 1.42931400  |
| H | -1.91958400 | 2.38144900  | 3.47512000  |
| H | -3.60640100 | 1.51864500  | 5.06793300  |
| H | -5.16575000 | -0.29031400 | 4.29816800  |
| H | -5.14265500 | -1.04523400 | 1.99808800  |
| H | 0.37173400  | 0.00877900  | -2.18239800 |



|    |             |             |             |
|----|-------------|-------------|-------------|
| H  | 0.15232100  | 0.61520700  | -4.56615700 |
| H  | 0.22976100  | 3.00137900  | -5.27012400 |
| H  | 0.53413300  | 4.78135200  | -3.55806800 |
| H  | 0.75414400  | 4.17640400  | -1.16684600 |
| H  | 2.79416200  | 1.76085600  | 2.75111300  |
| H  | 4.55461000  | 3.40765500  | 3.34243800  |
| H  | 5.96050200  | 4.42501900  | 1.55947200  |
| H  | 5.59414500  | 3.77949500  | -0.81635100 |
| H  | 3.83192200  | 2.13978800  | -1.39834400 |
| H  | -4.14532900 | -2.14084300 | 0.50070700  |
| H  | -3.72110400 | -1.87153000 | -1.16708200 |
| H  | -5.86637500 | -0.64786600 | -1.57122400 |
| H  | -6.33508300 | -0.88212100 | 0.10289400  |
| H  | -6.26803300 | -3.37944900 | -0.22759700 |
| H  | -5.78245200 | -3.14597700 | -1.89892400 |
| H  | -8.24116400 | -3.59679800 | -1.75184900 |
| H  | -7.96540200 | -1.96255200 | -2.37585900 |
| H  | -8.45504500 | -2.19513200 | -0.69125600 |
| H  | -3.53495500 | 0.13288300  | -2.00994300 |
| H  | -2.04242700 | 0.54359600  | -1.18715800 |
| H  | -3.06088900 | 2.53944900  | -2.01833100 |
| H  | -3.16680600 | 2.62791400  | -0.27288400 |
| H  | -5.56665500 | 1.87627700  | -0.37098200 |
| H  | -5.46648400 | 1.81392200  | -2.12488600 |
| H  | -6.51538000 | 3.96282200  | -1.37938000 |
| H  | -4.97523600 | 4.29473800  | -2.18834100 |
| H  | -5.07861600 | 4.35435700  | -0.42238500 |
| H  | 2.22158300  | -2.62332400 | -0.91152000 |
| H  | 3.79915600  | -3.19506200 | -2.72603900 |
| H  | 7.06530500  | -1.61299300 | -0.42209200 |
| H  | 5.48881300  | -1.04222800 | 1.41335900  |
| H  | 7.36239200  | -2.15013100 | -2.84764900 |
| H  | 6.01866200  | -2.83169900 | -3.78397500 |
| H  | 6.90703300  | -3.84368600 | -2.64130100 |
| Cu | 0.10251200  | -1.06659300 | 0.86209400  |

|   |             |             |             |
|---|-------------|-------------|-------------|
| O | -1.31516600 | -2.34505100 | 0.52913200  |
| C | -0.91555600 | -2.81525400 | -0.60522300 |
| O | 0.02970100  | -2.29473800 | -1.24234600 |
| C | -1.59902800 | -4.06530800 | -1.12382900 |
| H | -2.59051400 | -4.19441200 | -0.68489800 |
| H | -1.66182000 | -4.03946300 | -2.21504500 |
| H | -0.98711300 | -4.93189200 | -0.84556400 |

### 3. Copies of HPLC charts

#### (1) 3a (IA)

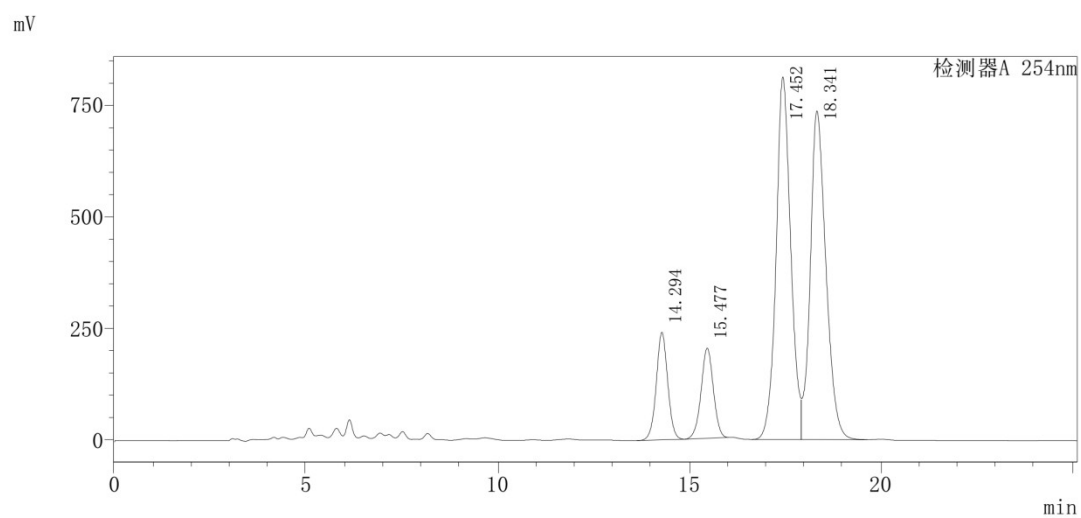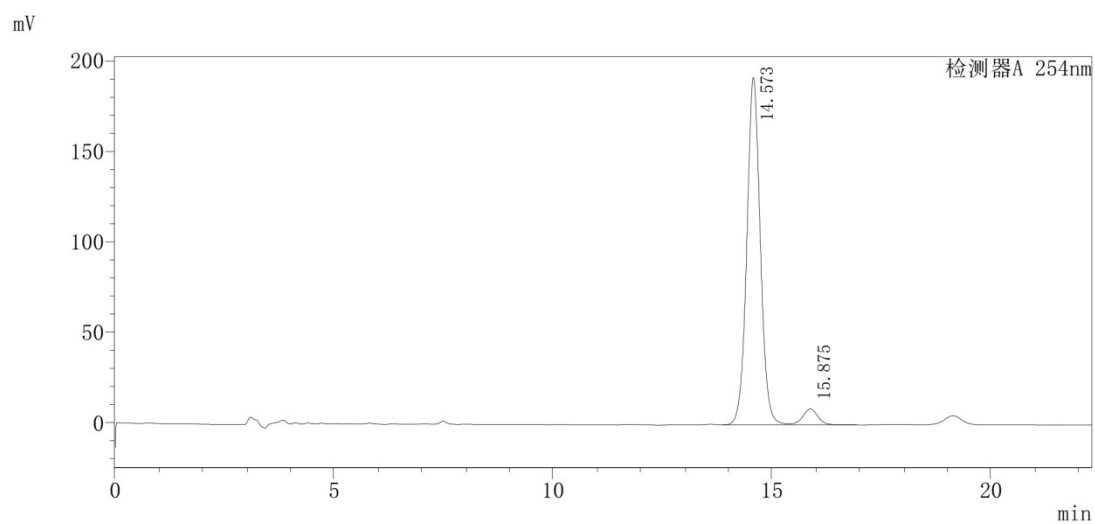

| Peak# | Ret Time | Area    | Height | Area%  |
|-------|----------|---------|--------|--------|
| 1     | 14.573   | 4100906 | 191625 | 95.025 |
| 2     | 15.875   | 214685  | 8832   | 4.975  |

(2) 3a (OD-H)

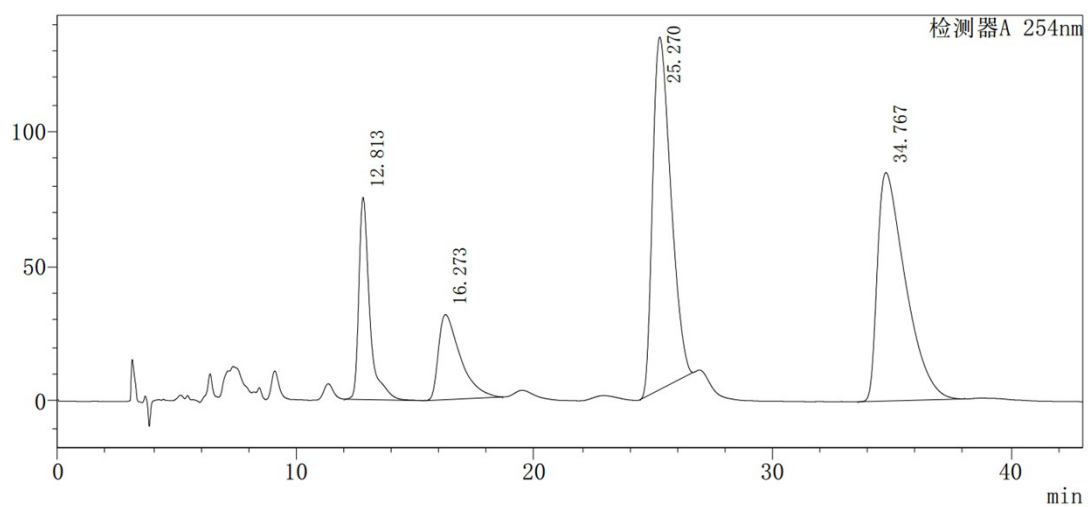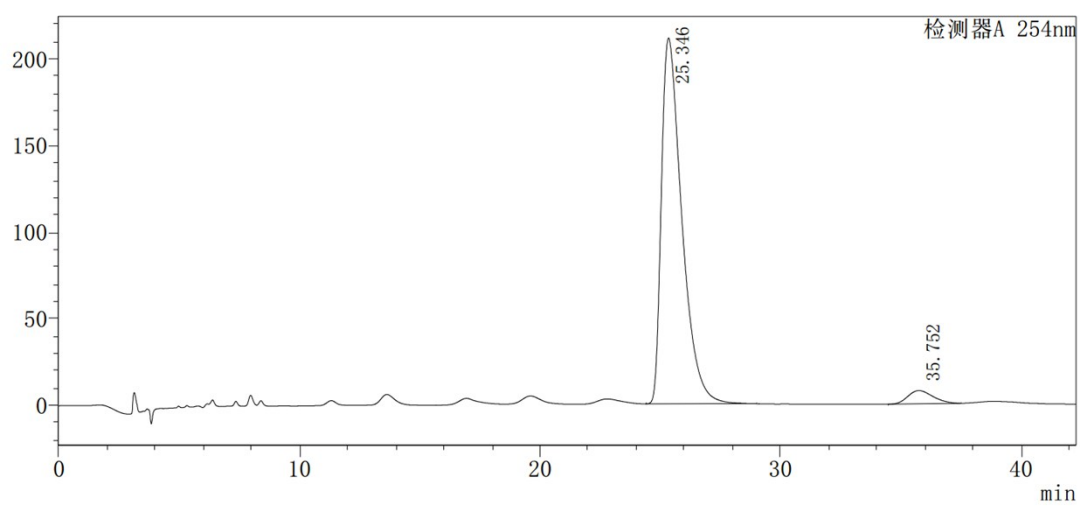

| Peak# | Ret Time | Area     | Height | Area%  |
|-------|----------|----------|--------|--------|
| 1     | 25.346   | 12467002 | 211151 | 95.732 |
| 2     | 35.752   | 555830   | 7662   | 4.268  |

(3) 3b

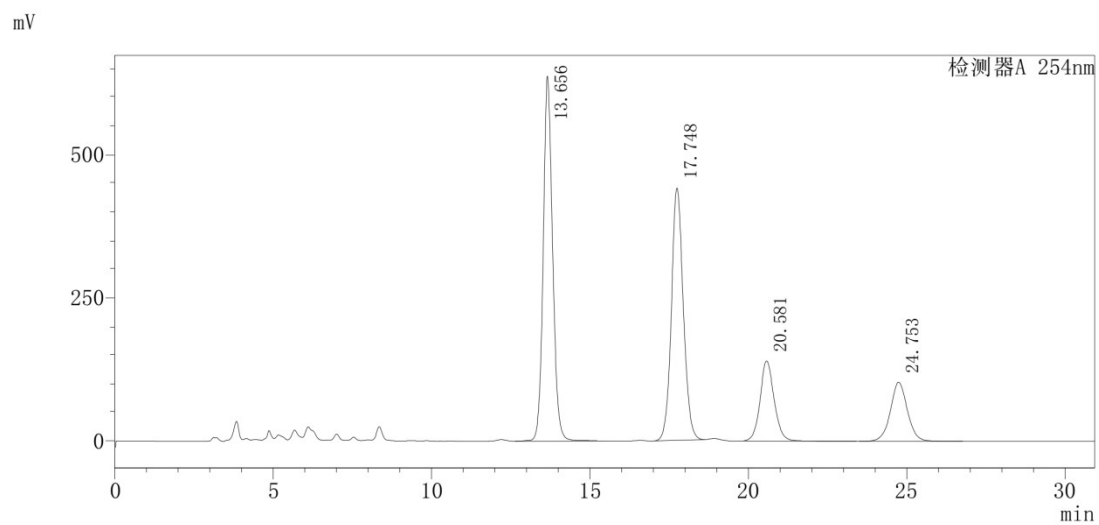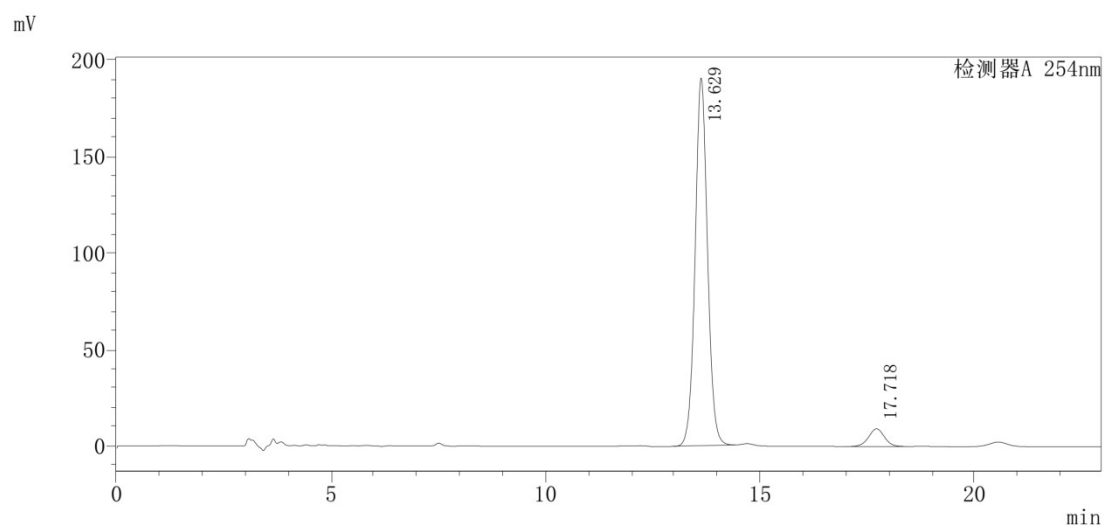

| Peak# | Ret Time | Area    | Height | Area%  |
|-------|----------|---------|--------|--------|
| 1     | 13.629   | 3819985 | 190618 | 94.166 |
| 2     | 17.718   | 236657  | 9211   | 5.834  |

(4) 3c

mV

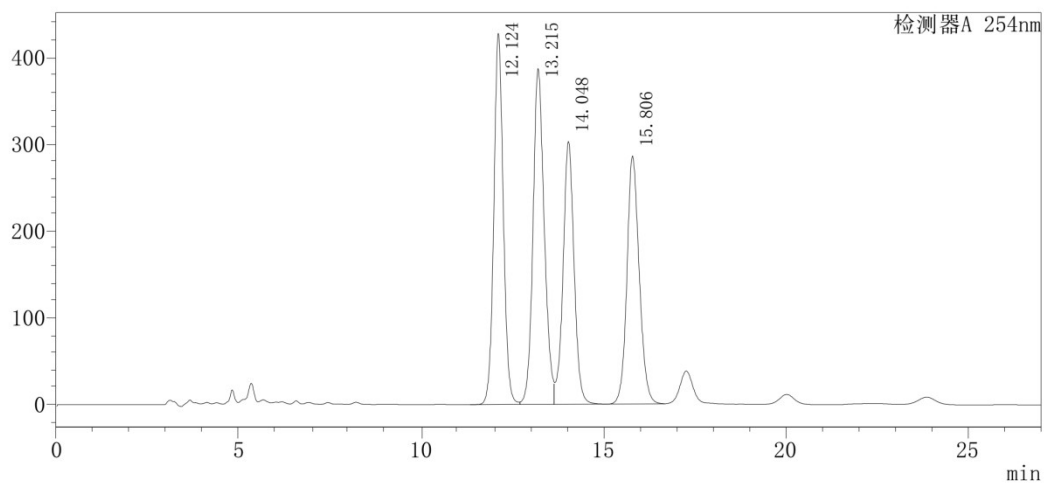

mV

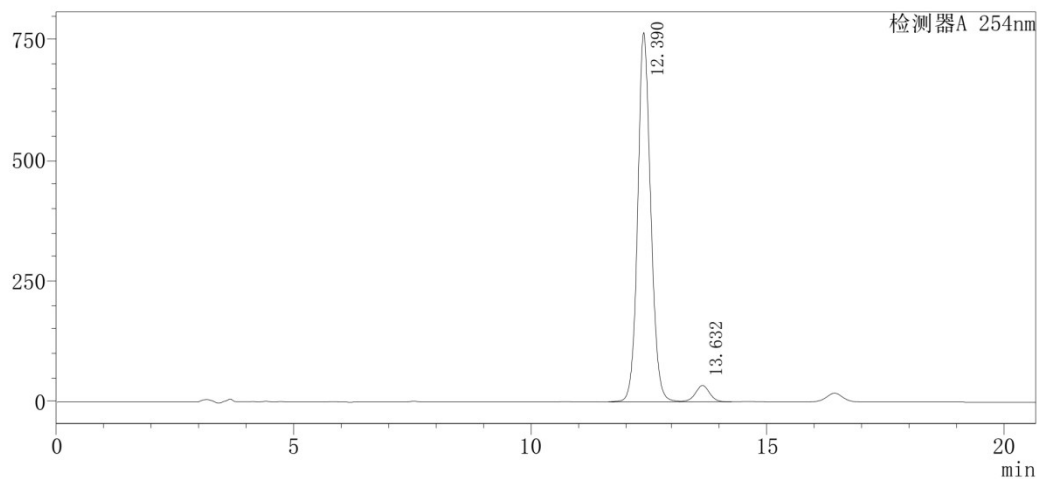

| Peak# | Ret Time | Area     | Height | Area%  |
|-------|----------|----------|--------|--------|
| 1     | 12.390   | 14678413 | 764645 | 95.296 |
| 2     | 13.632   | 724563   | 34144  | 4.704  |

(5) 3d

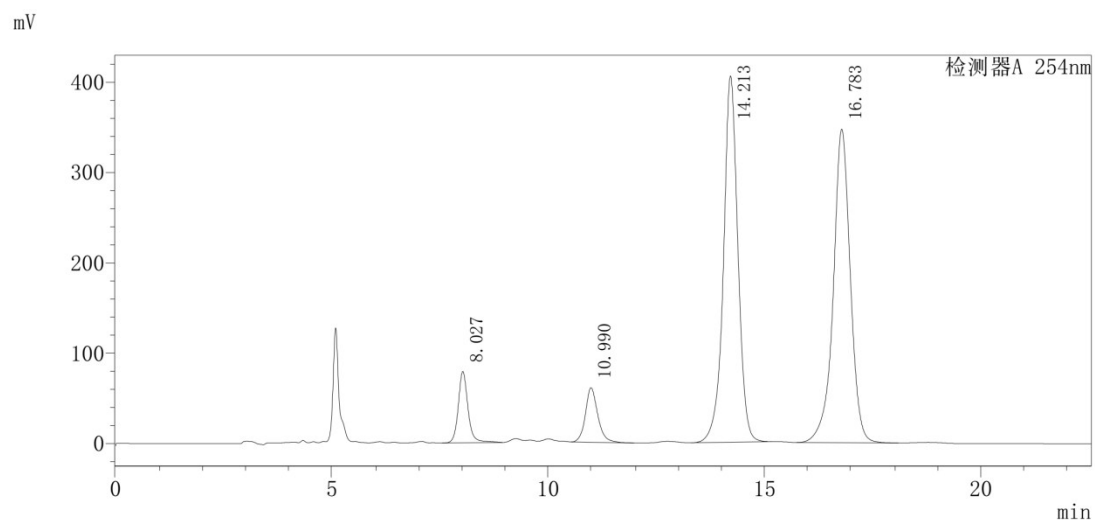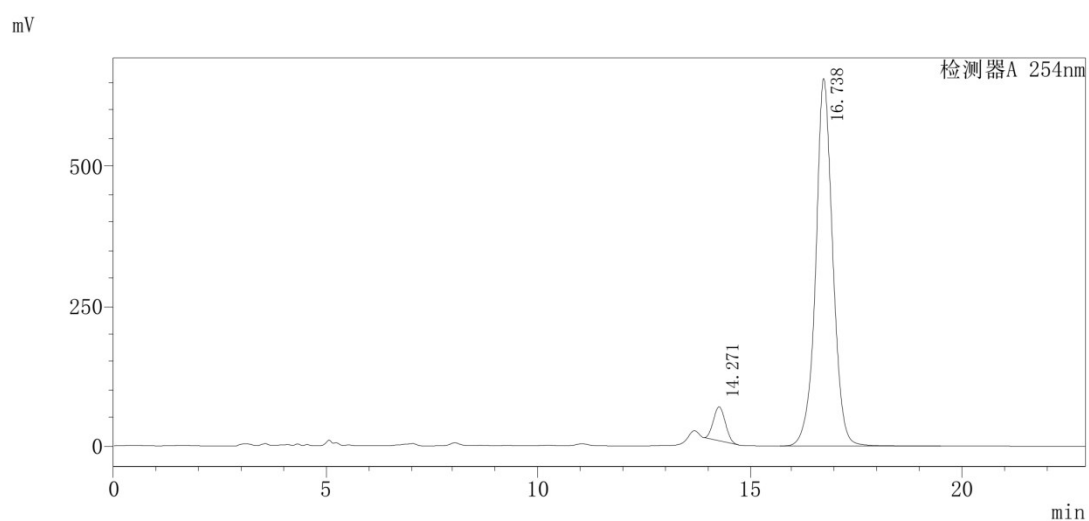

| Peak# | Ret Time | Area     | Height | Area%  |
|-------|----------|----------|--------|--------|
| 1     | 14.271   | 1191493  | 60832  | 6.078  |
| 2     | 16.738   | 18410285 | 657520 | 93.922 |

(6) 3e

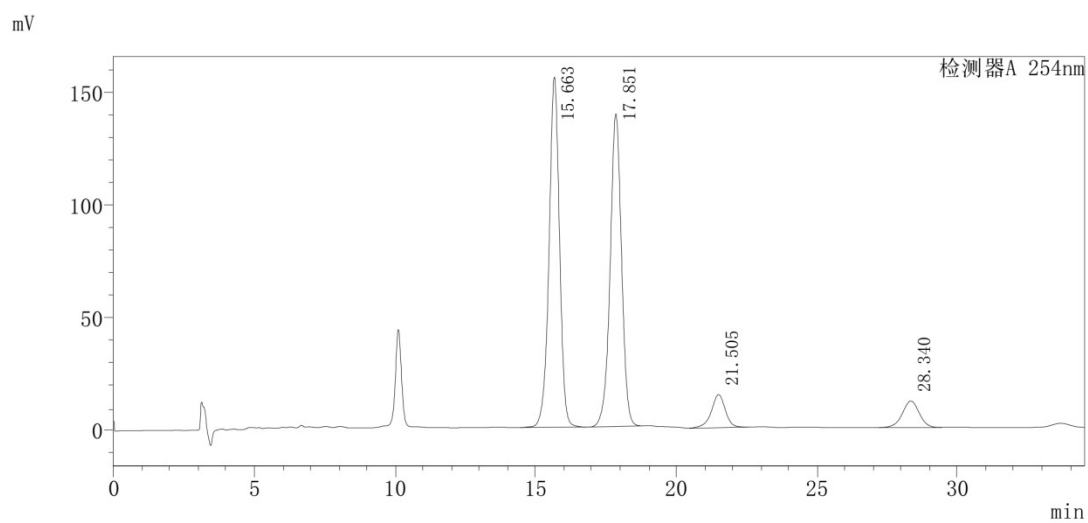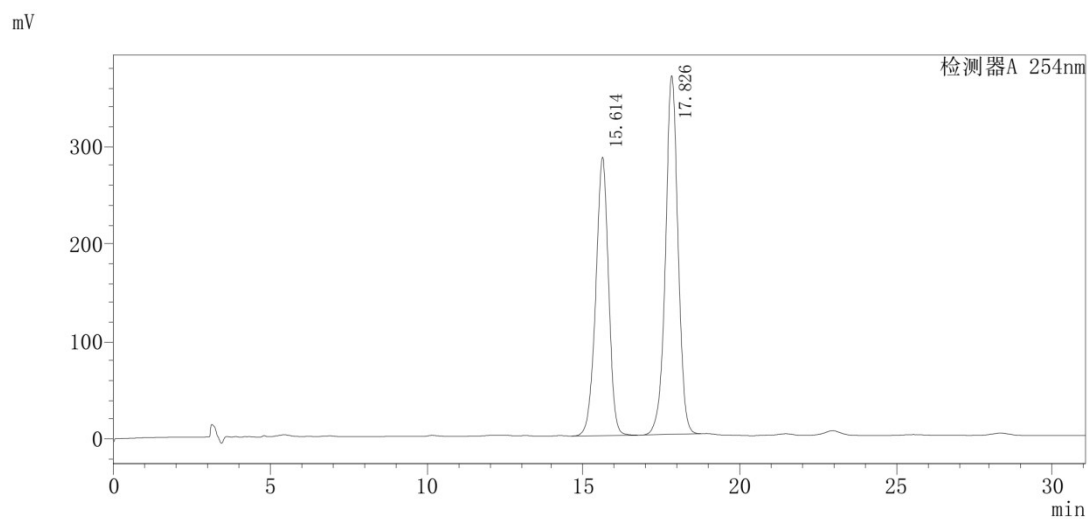

| Peak# | Ret Time | Area     | Height | Area%  |
|-------|----------|----------|--------|--------|
| 1     | 15.614   | 8142939  | 285874 | 44.234 |
| 2     | 17.826   | 10265661 | 368278 | 55.766 |



(7) 3f

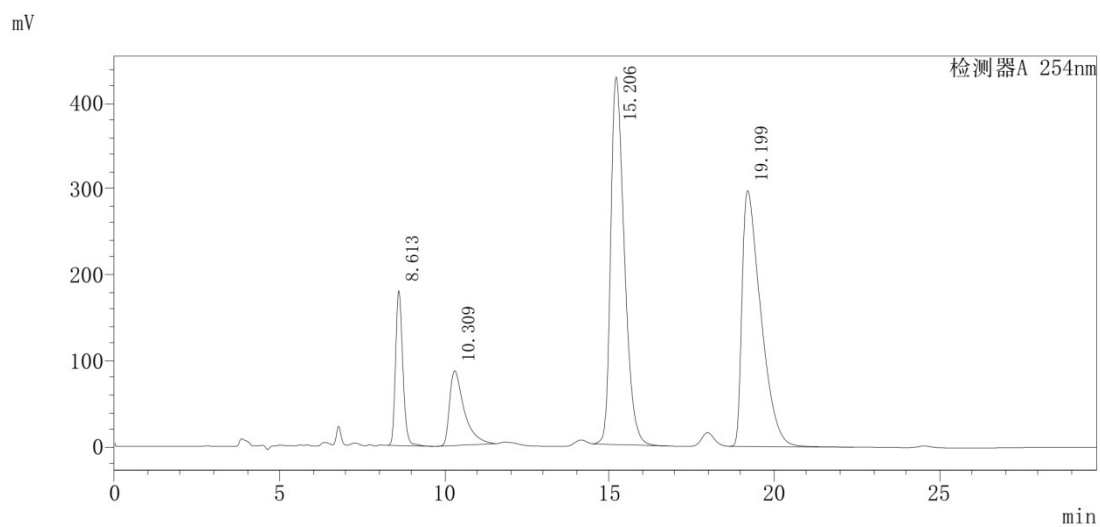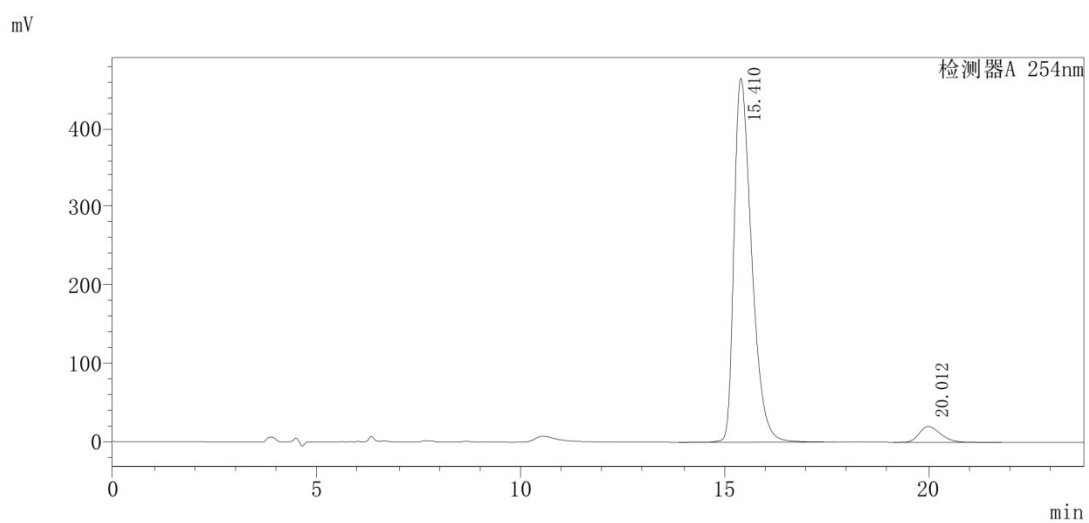

| Peak# | Ret Time | Area     | Height | Area%  |
|-------|----------|----------|--------|--------|
| 1     | 15.410   | 14000548 | 465391 | 94.959 |
| 2     | 20.012   | 743287   | 20270  | 5.041  |

(8) 3g

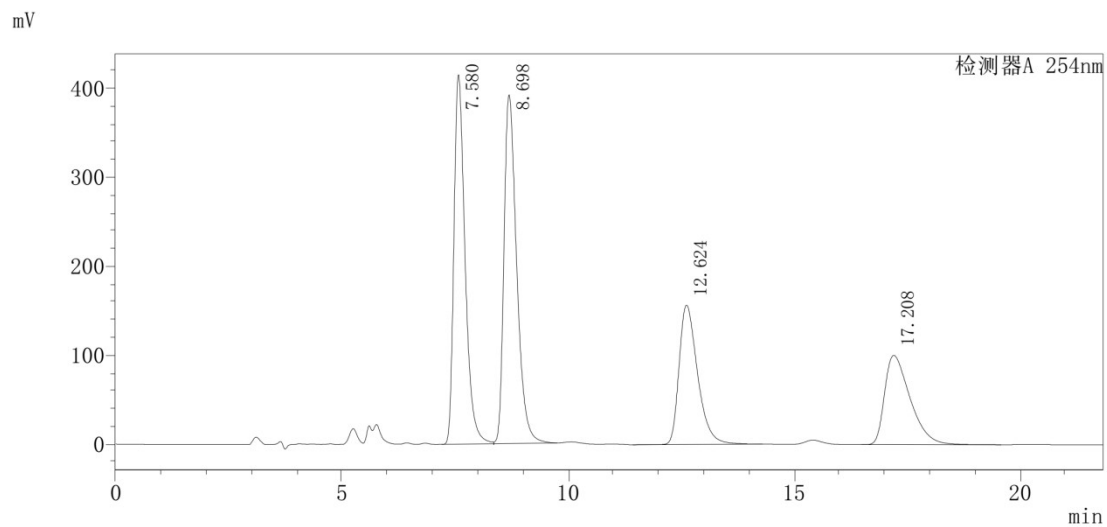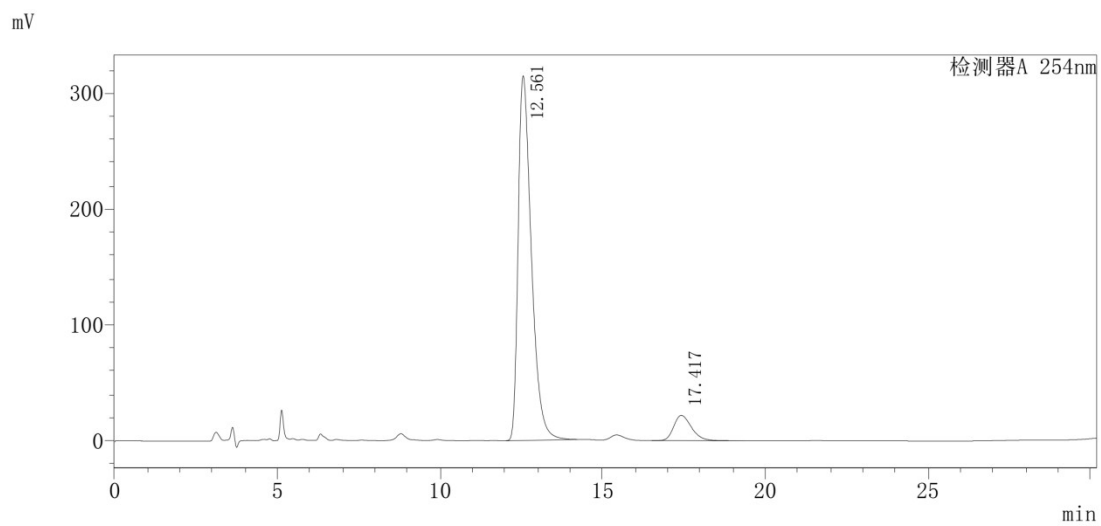

| Peak# | Ret Time | Area    | Height | Area%  |
|-------|----------|---------|--------|--------|
| 1     | 12.561   | 8932603 | 314200 | 91.431 |
| 2     | 17.417   | 837217  | 21828  | 8.569  |

(9) 3h

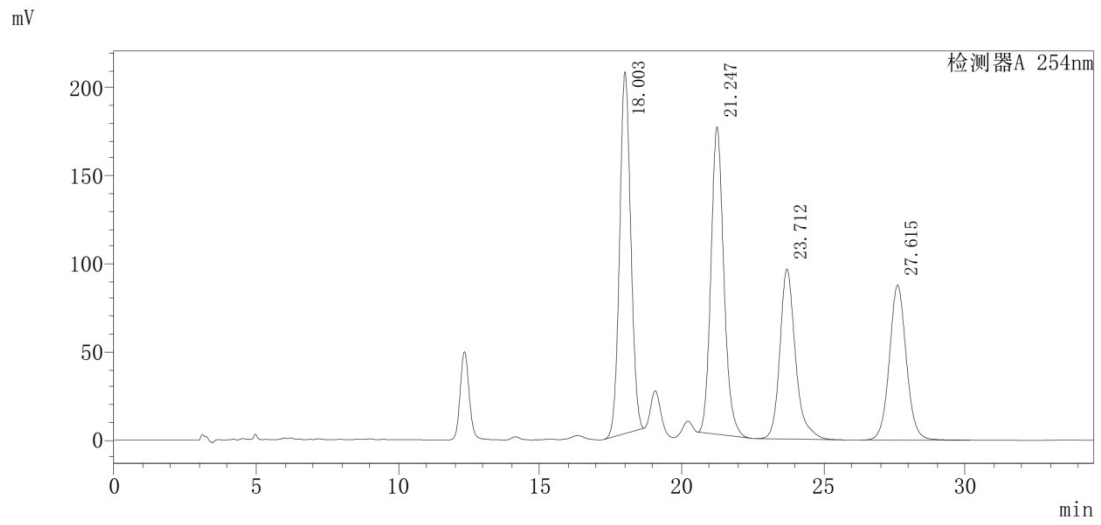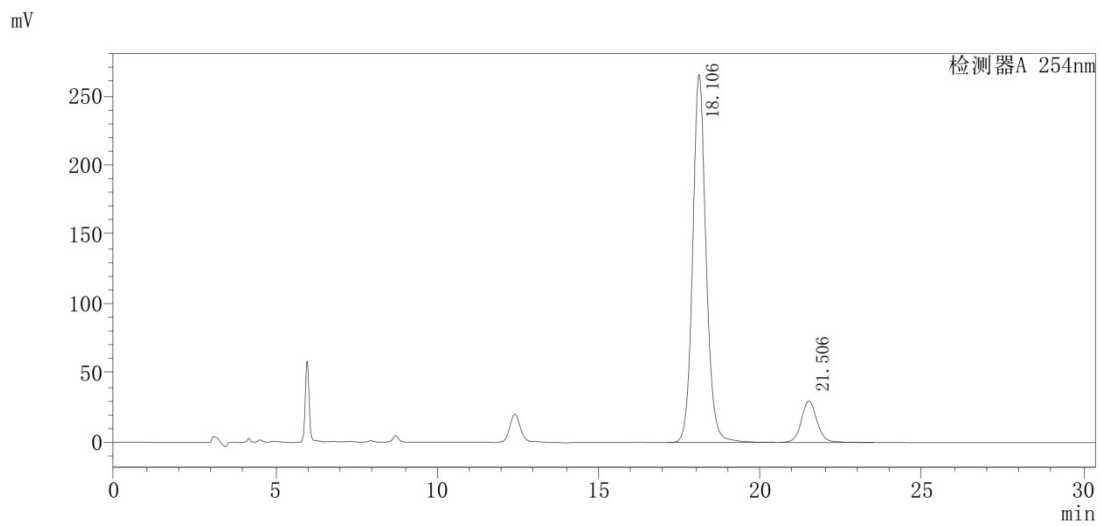

| Peak# | Ret Time | Area    | Height | Area%  |
|-------|----------|---------|--------|--------|
| 1     | 18.106   | 7676384 | 265600 | 88.528 |
| 2     | 21.506   | 994743  | 29839  | 11.472 |

(10) 3i

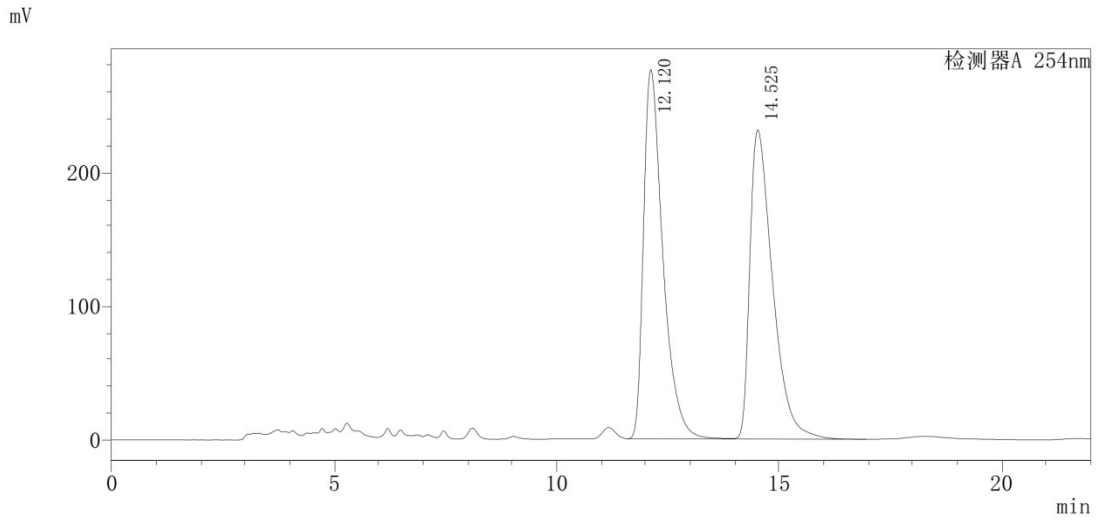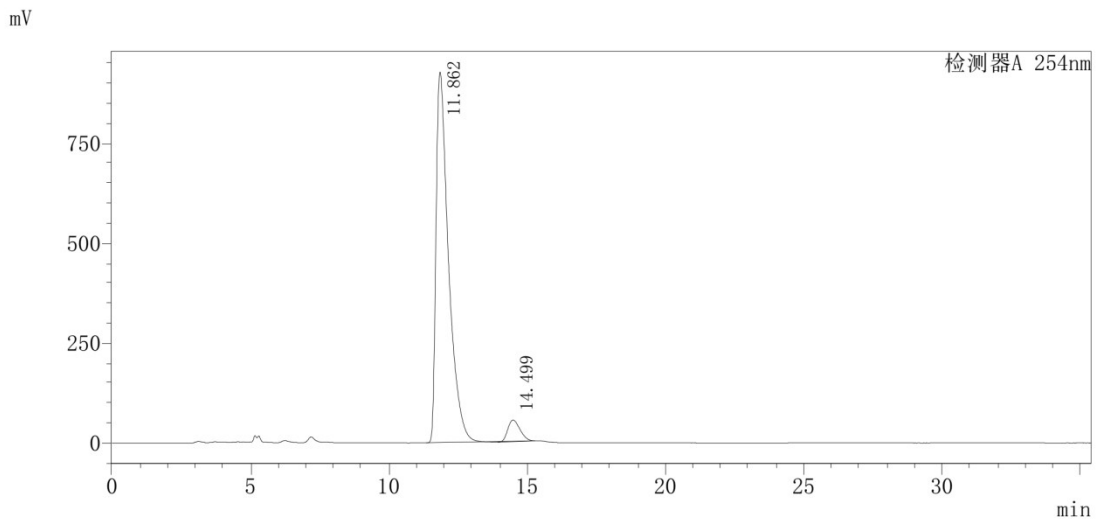

| Peak# | Ret Time | Area     | Height | Area%  |
|-------|----------|----------|--------|--------|
| 1     | 11.862   | 28904141 | 927189 | 94.575 |
| 2     | 14.499   | 1657989  | 54061  | 5.425  |

(11) 3j

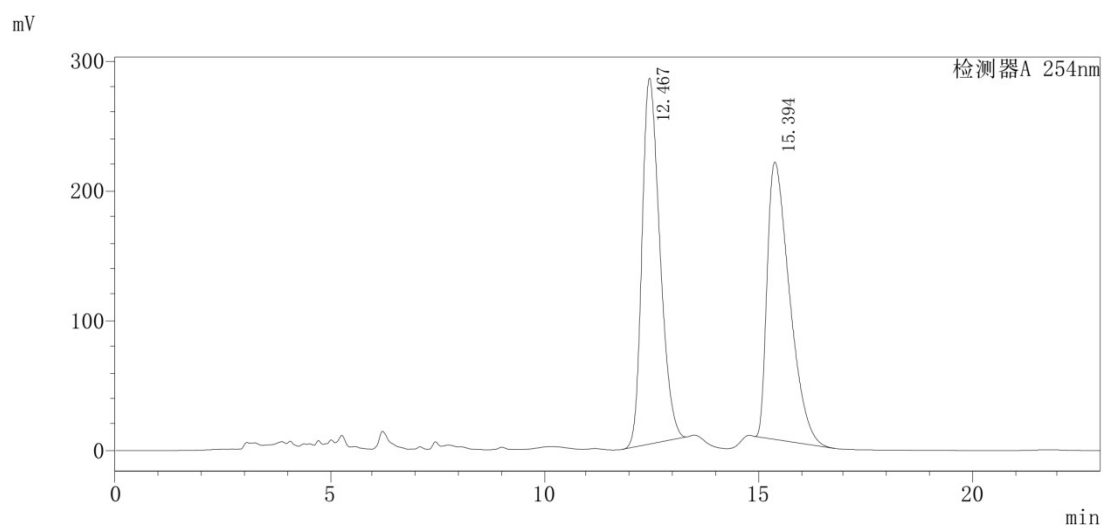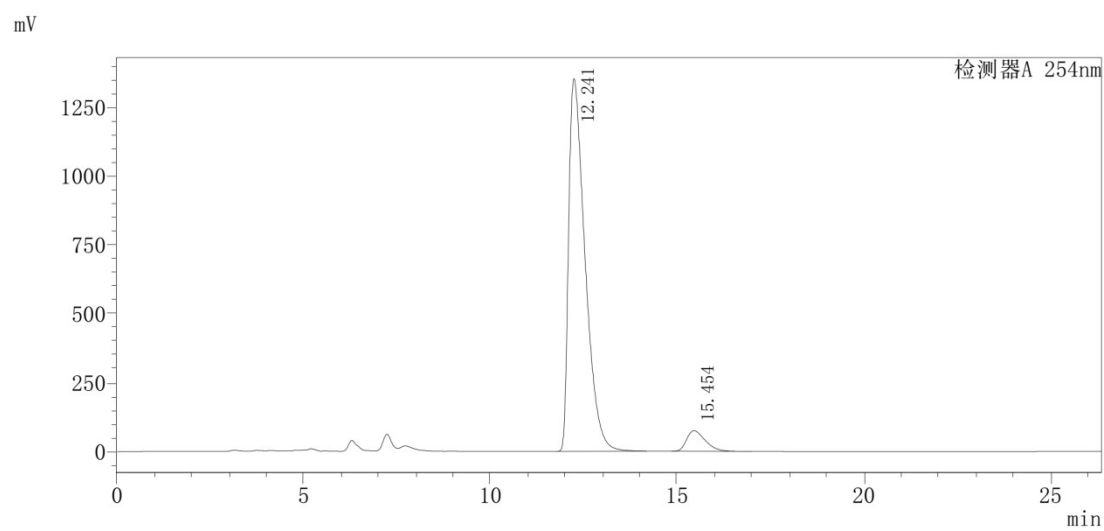

| Peak# | Ret Time | Area     | Height  | Area%  |
|-------|----------|----------|---------|--------|
| 1     | 12.241   | 41347734 | 1352742 | 94.123 |
| 2     | 15.454   | 2581562  | 74395   | 5.877  |

(12) 3k

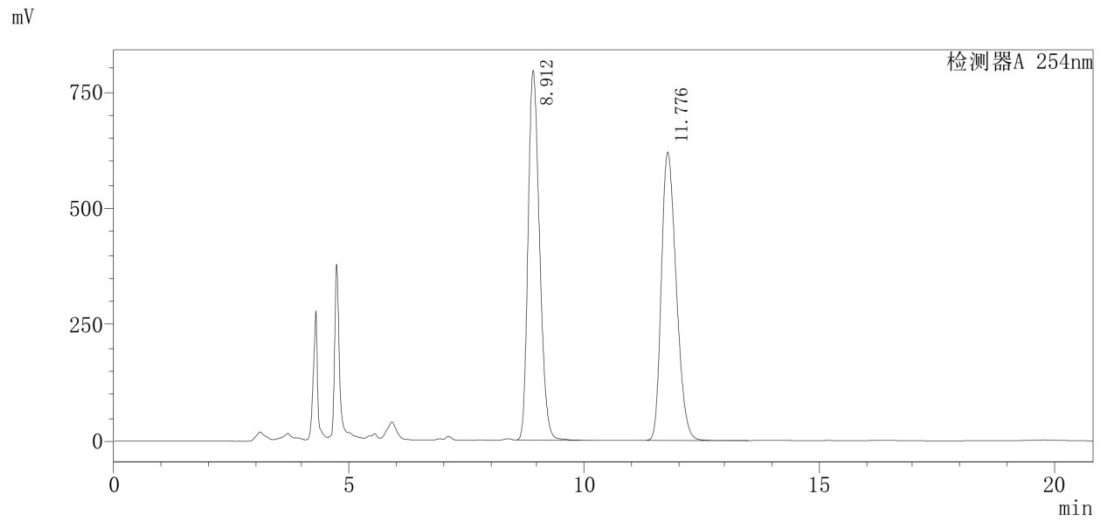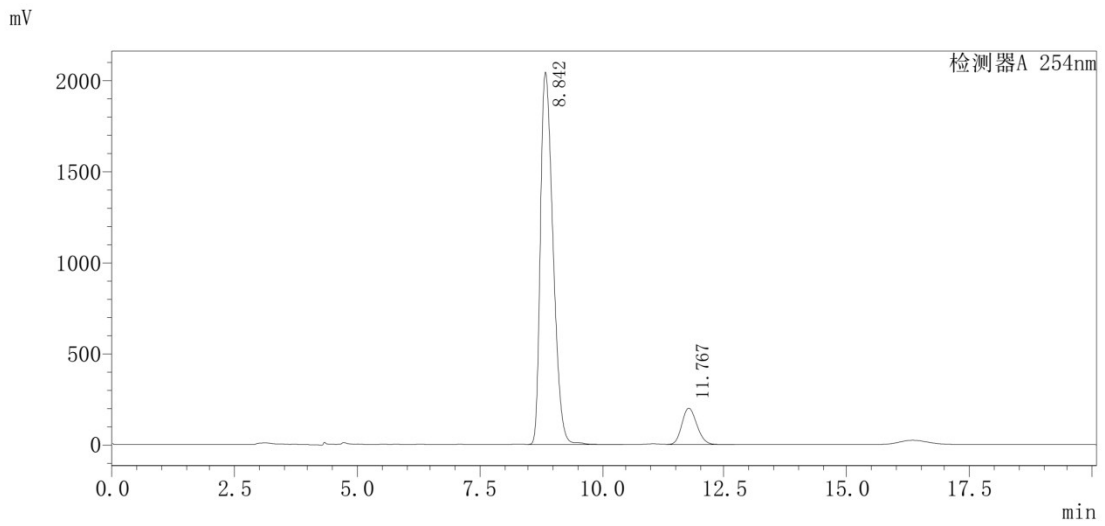

| Peak# | Ret Time | Area     | Height  | Area%  |
|-------|----------|----------|---------|--------|
| 1     | 8.842    | 36759662 | 2050060 | 89.691 |
| 2     | 11.767   | 4224974  | 200087  | 10.309 |

(13) 31

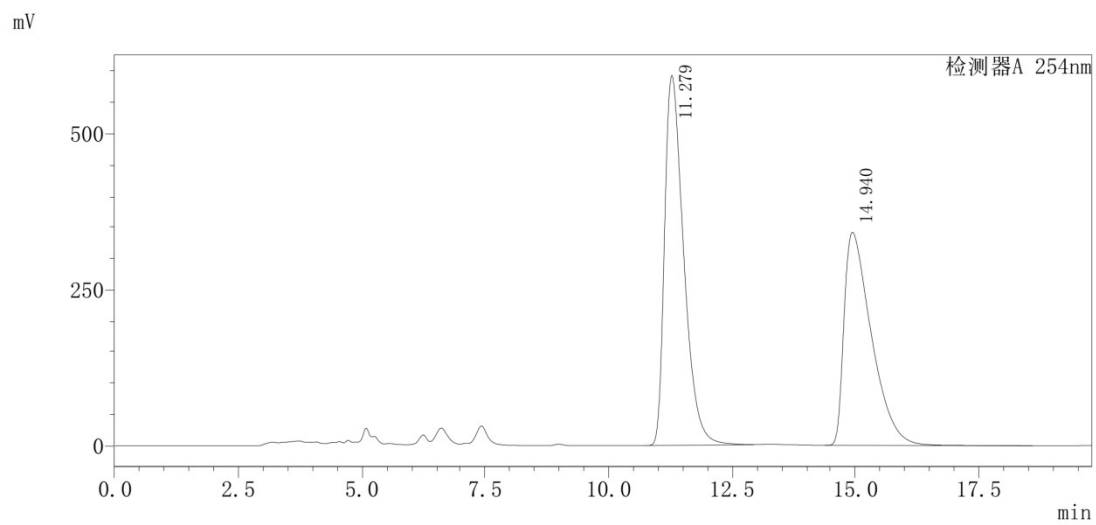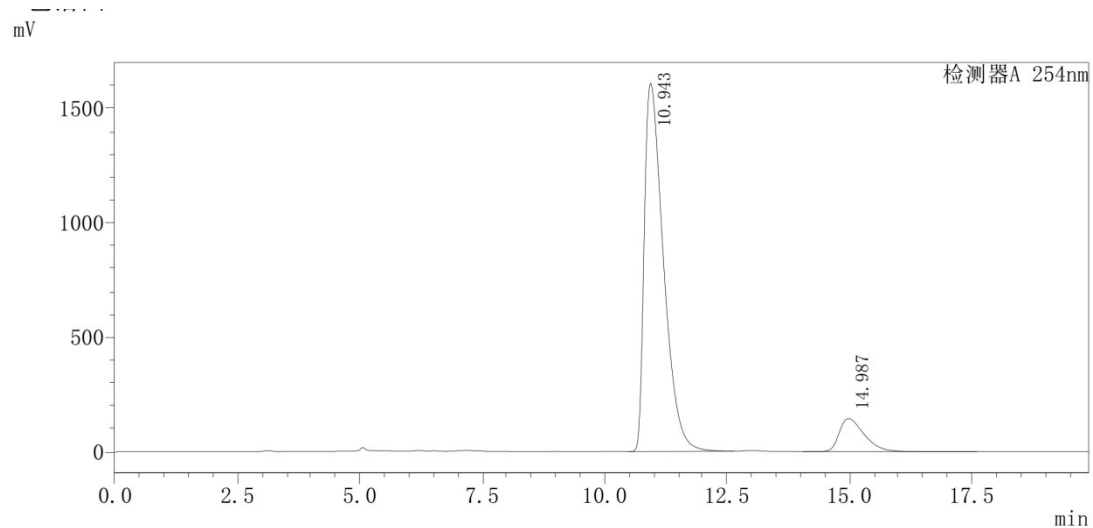

| Peak# | Ret Time | Area     | Height  | Area%  |
|-------|----------|----------|---------|--------|
| 1     | 10.943   | 43853461 | 1609351 | 89.528 |
| 2     | 14.987   | 5129686  | 144380  | 10.472 |

(14) 3m

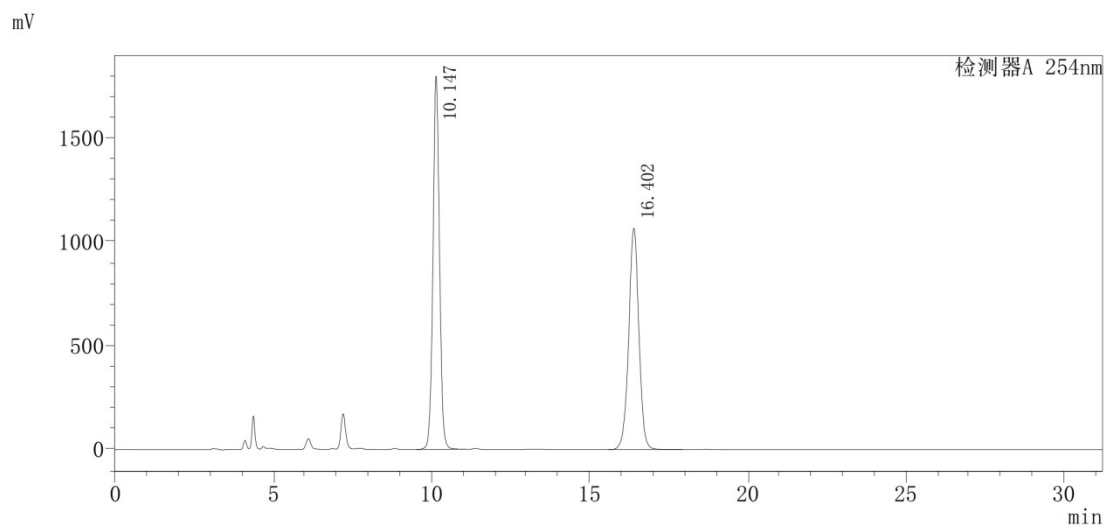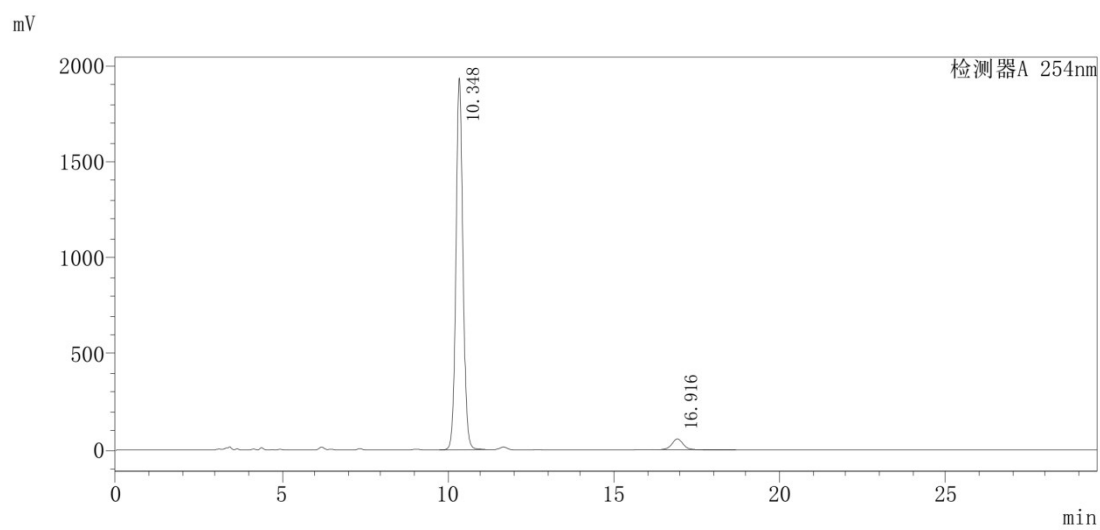

| Peak# | Ret Time | Area     | Height  | Area%  |
|-------|----------|----------|---------|--------|
| 1     | 10.348   | 28426366 | 1935021 | 95.460 |
| 2     | 16.916   | 1351896  | 56743   | 4.540  |



(15) 3n

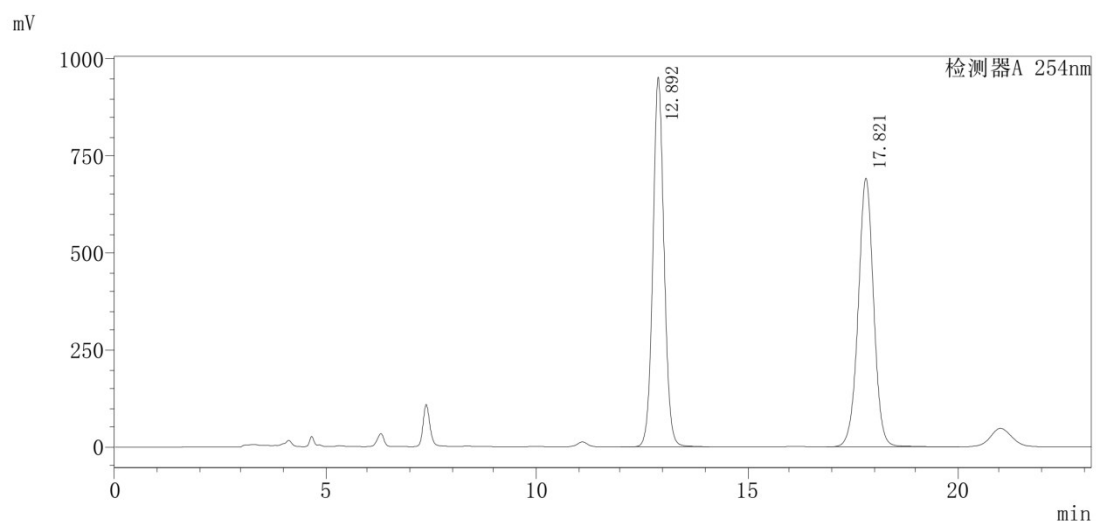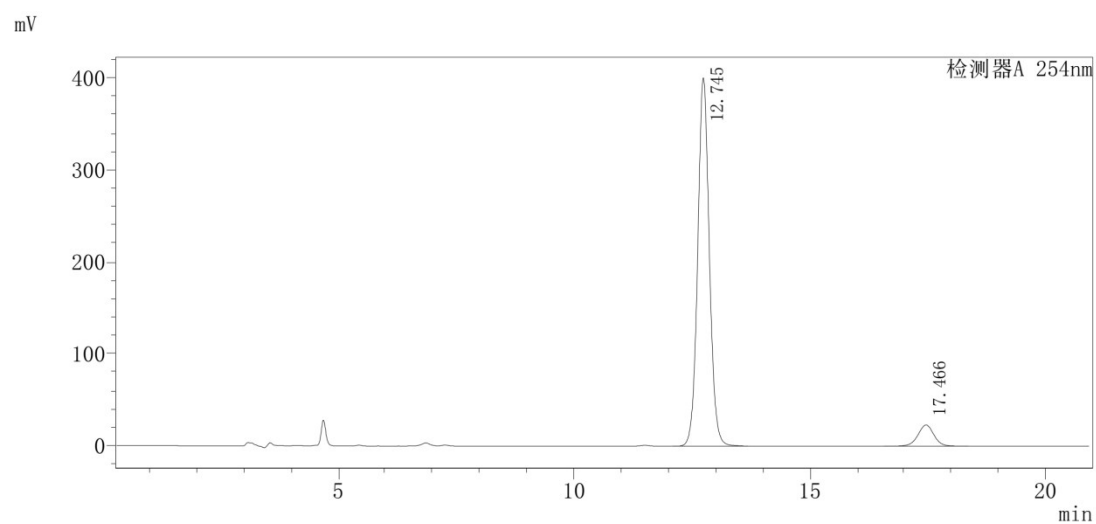

| Peak# | Ret Time | Area    | Height | Area%  |
|-------|----------|---------|--------|--------|
| 1     | 12.745   | 6877187 | 400786 | 92.674 |
| 2     | 17.466   | 543689  | 23048  | 7.326  |

(16) 3o

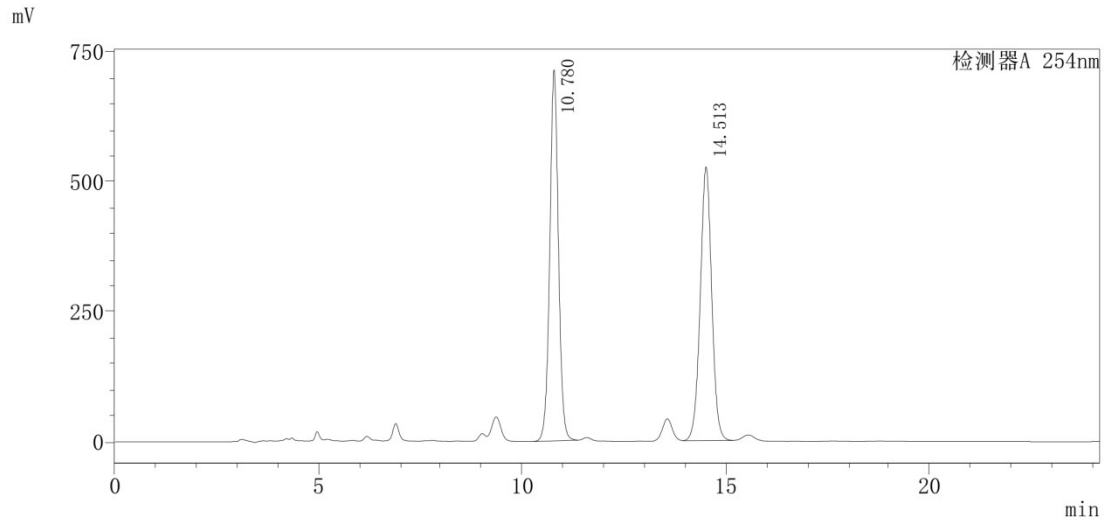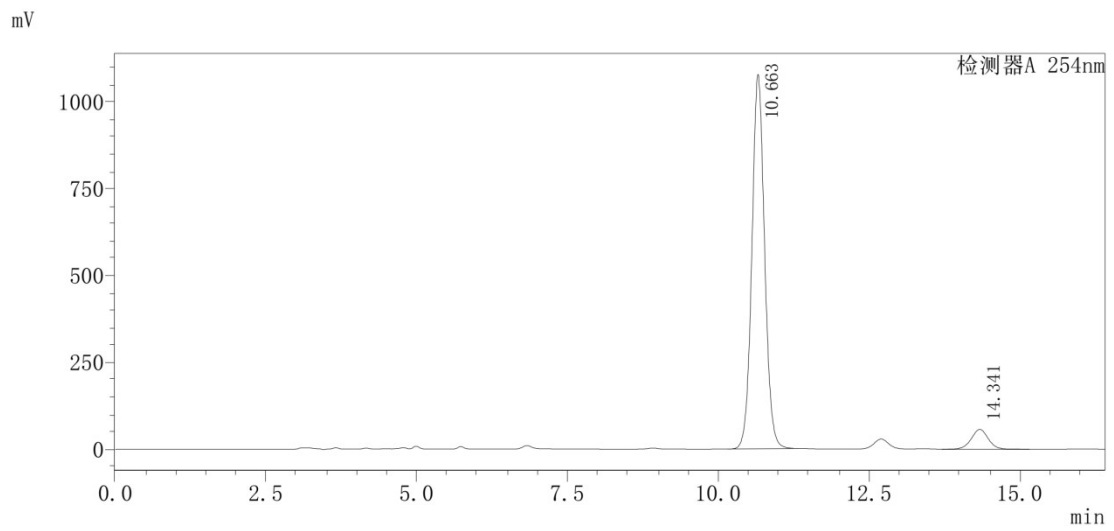

| Peak# | Ret Time | Area     | Height  | Area%  |
|-------|----------|----------|---------|--------|
| 1     | 10.663   | 15889075 | 1078063 | 93.421 |
| 2     | 14.341   | 1119045  | 57035   | 6.579  |

(17) 3p

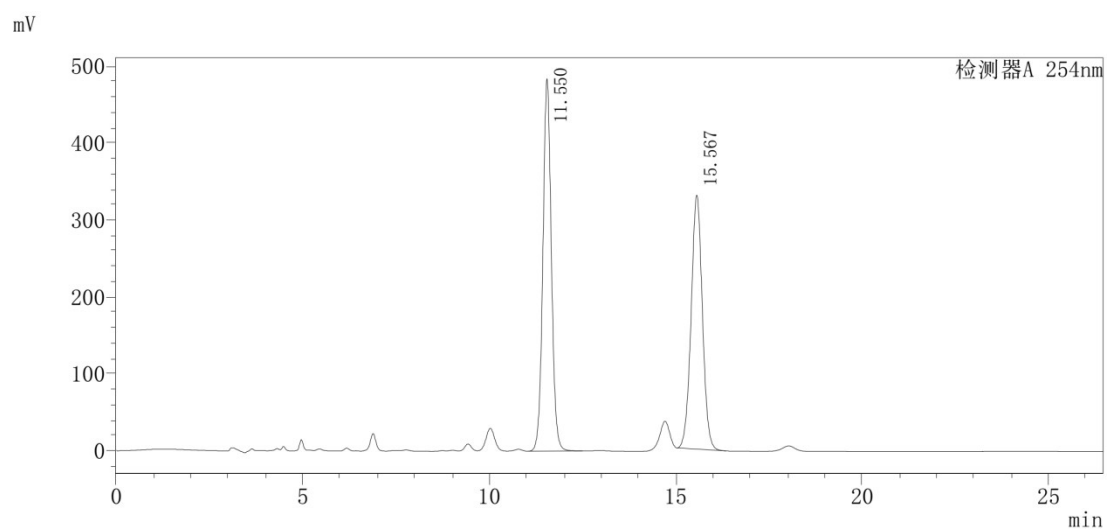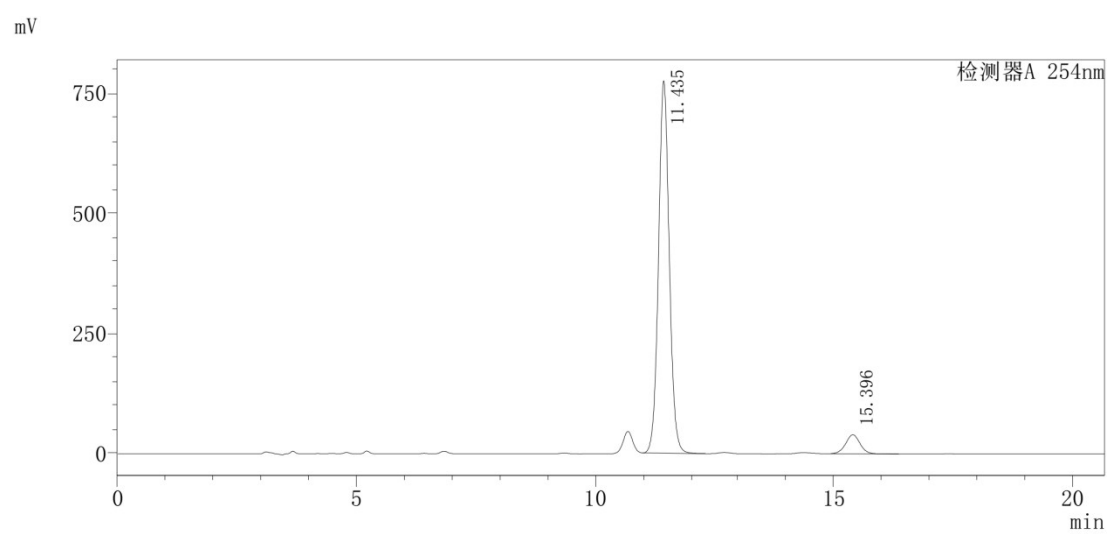

| Peak# | Ret Time | Area     | Height | Area%  |
|-------|----------|----------|--------|--------|
| 1     | 11.435   | 12131499 | 774194 | 93.594 |
| 2     | 15.396   | 830306   | 39638  | 6.406  |

(18) 3q

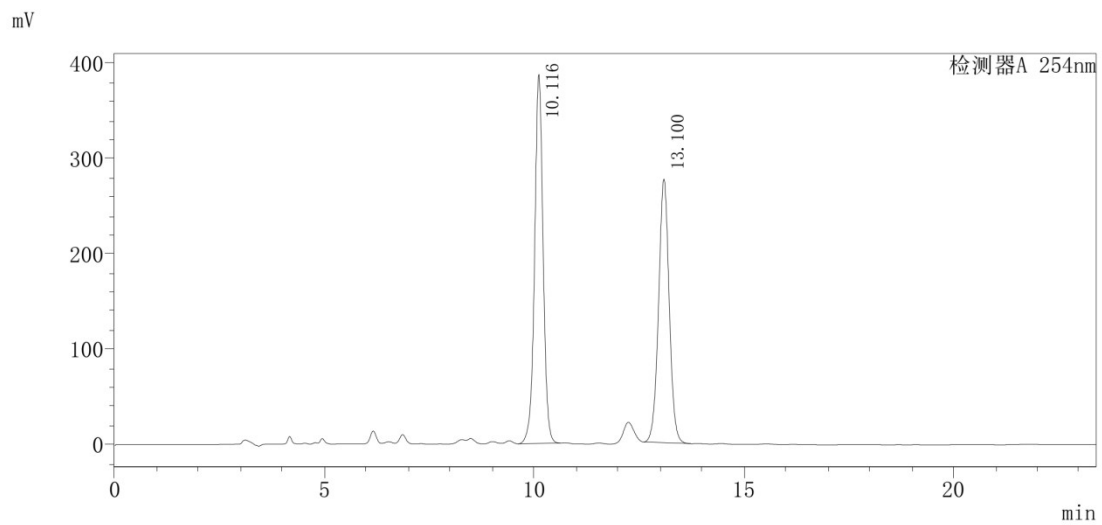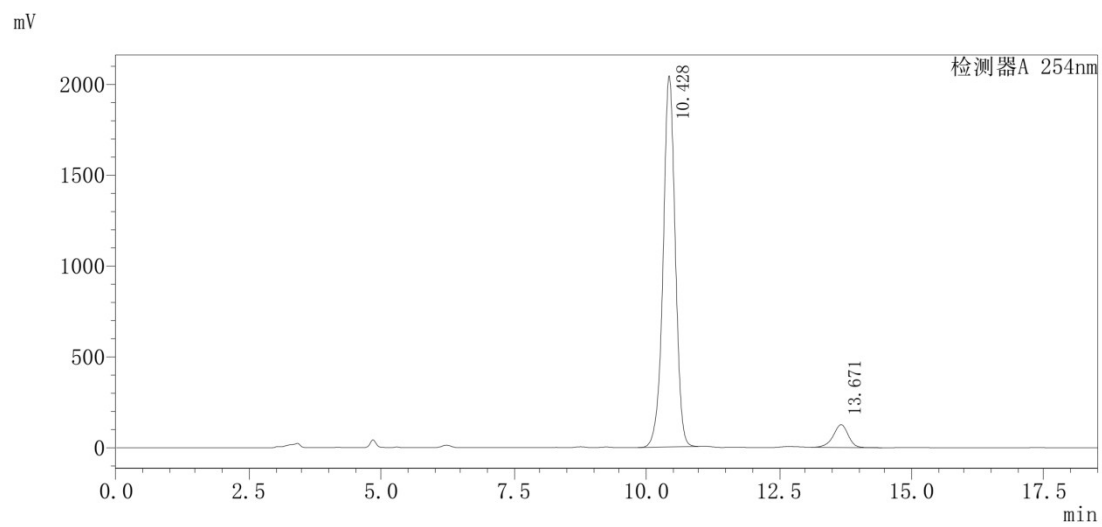

| Peak# | Ret Time | Area     | Height  | Area%  |
|-------|----------|----------|---------|--------|
| 1     | 10.428   | 32505028 | 2041564 | 92.929 |
| 2     | 13.671   | 2473402  | 125519  | 7.071  |

(19) 3r

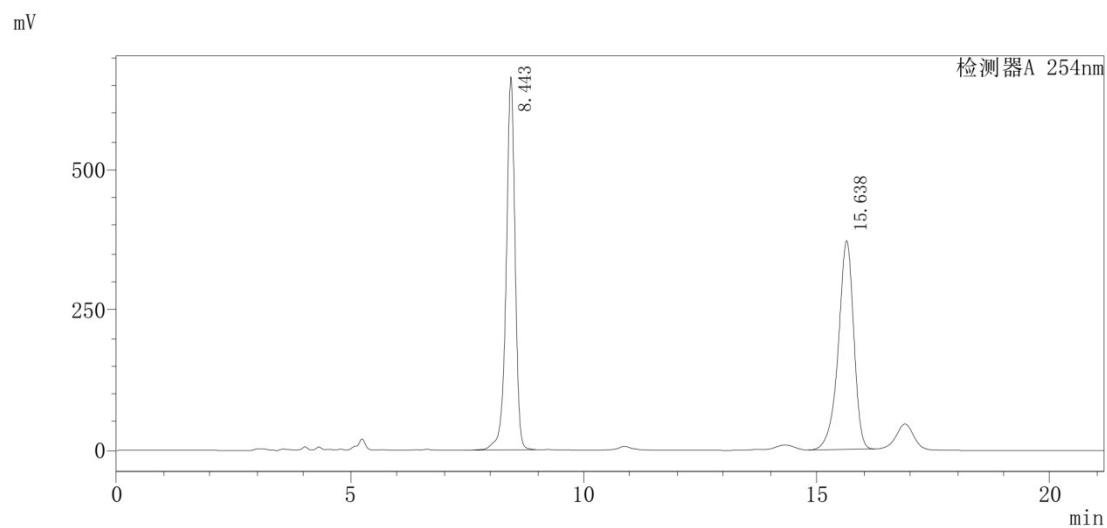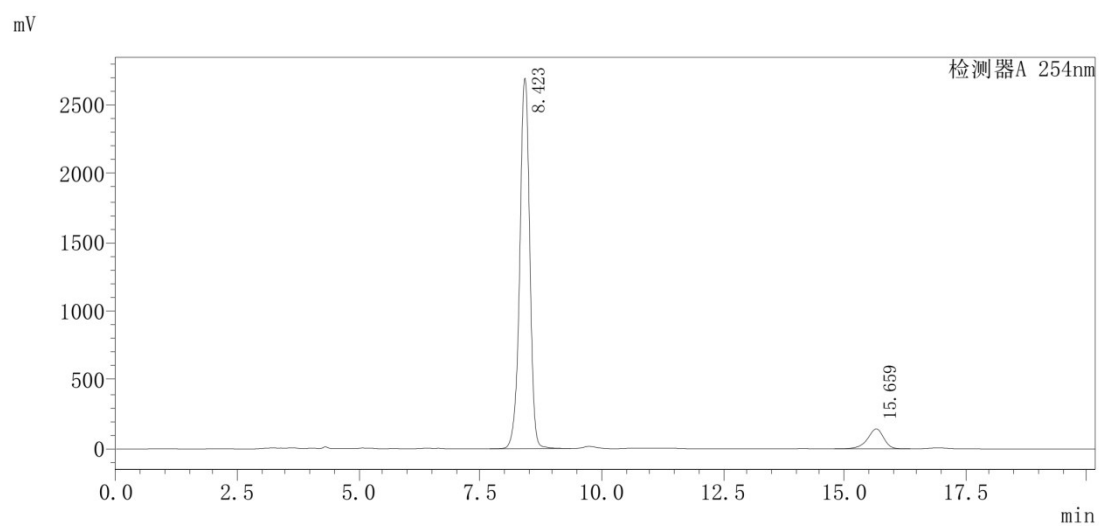

| Peak# | Ret Time | Area     | Height  | Area%  |
|-------|----------|----------|---------|--------|
| 1     | 8.423    | 38703431 | 2692387 | 91.990 |
| 2     | 15.659   | 3370236  | 144656  | 8.010  |

## 4. Copies of NMR spectra

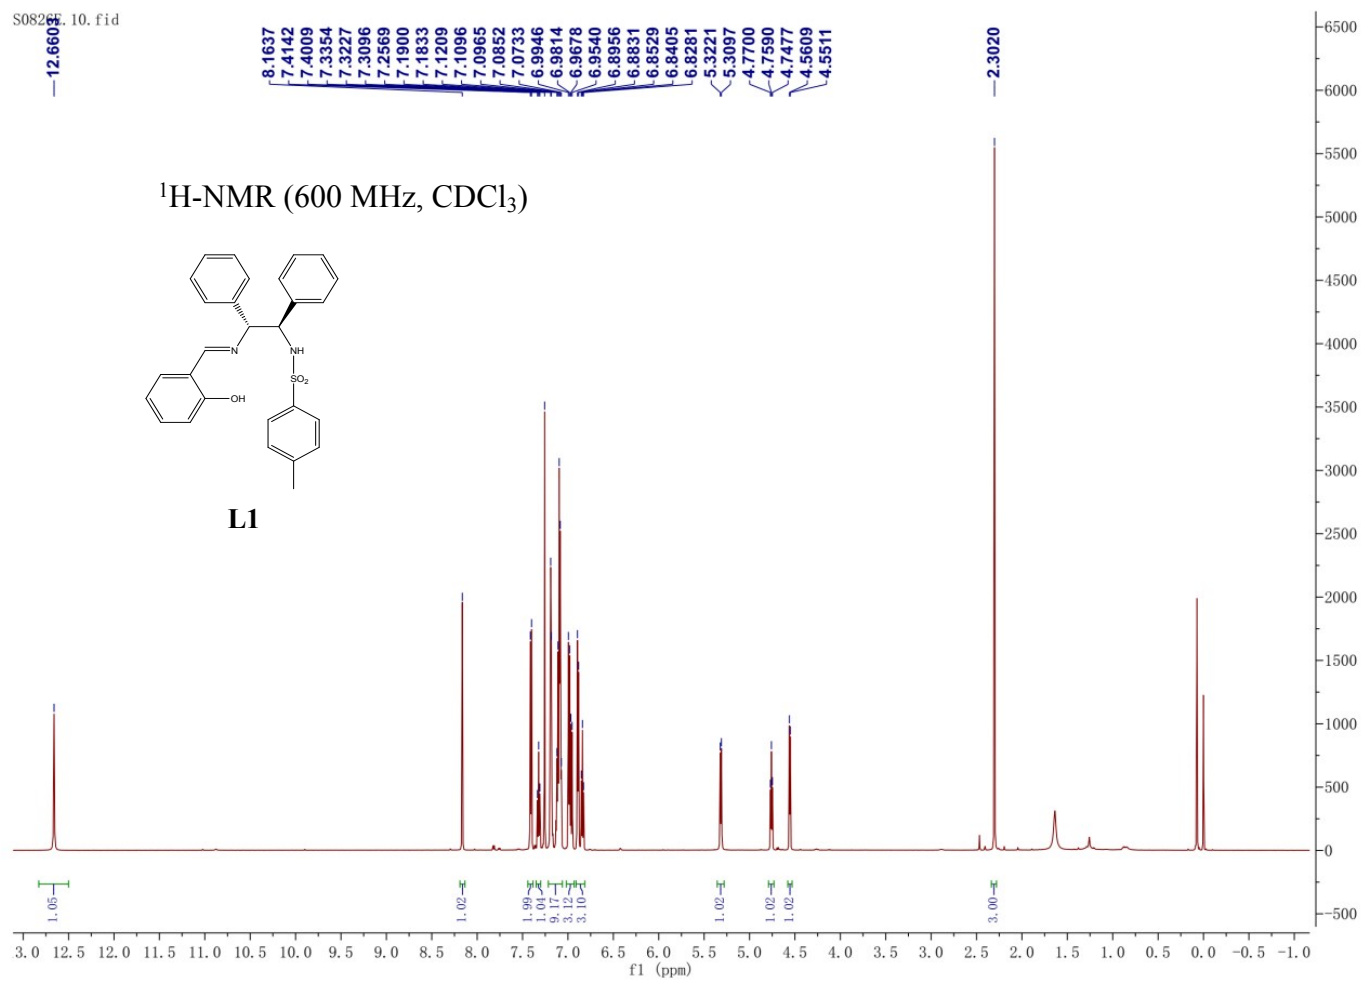

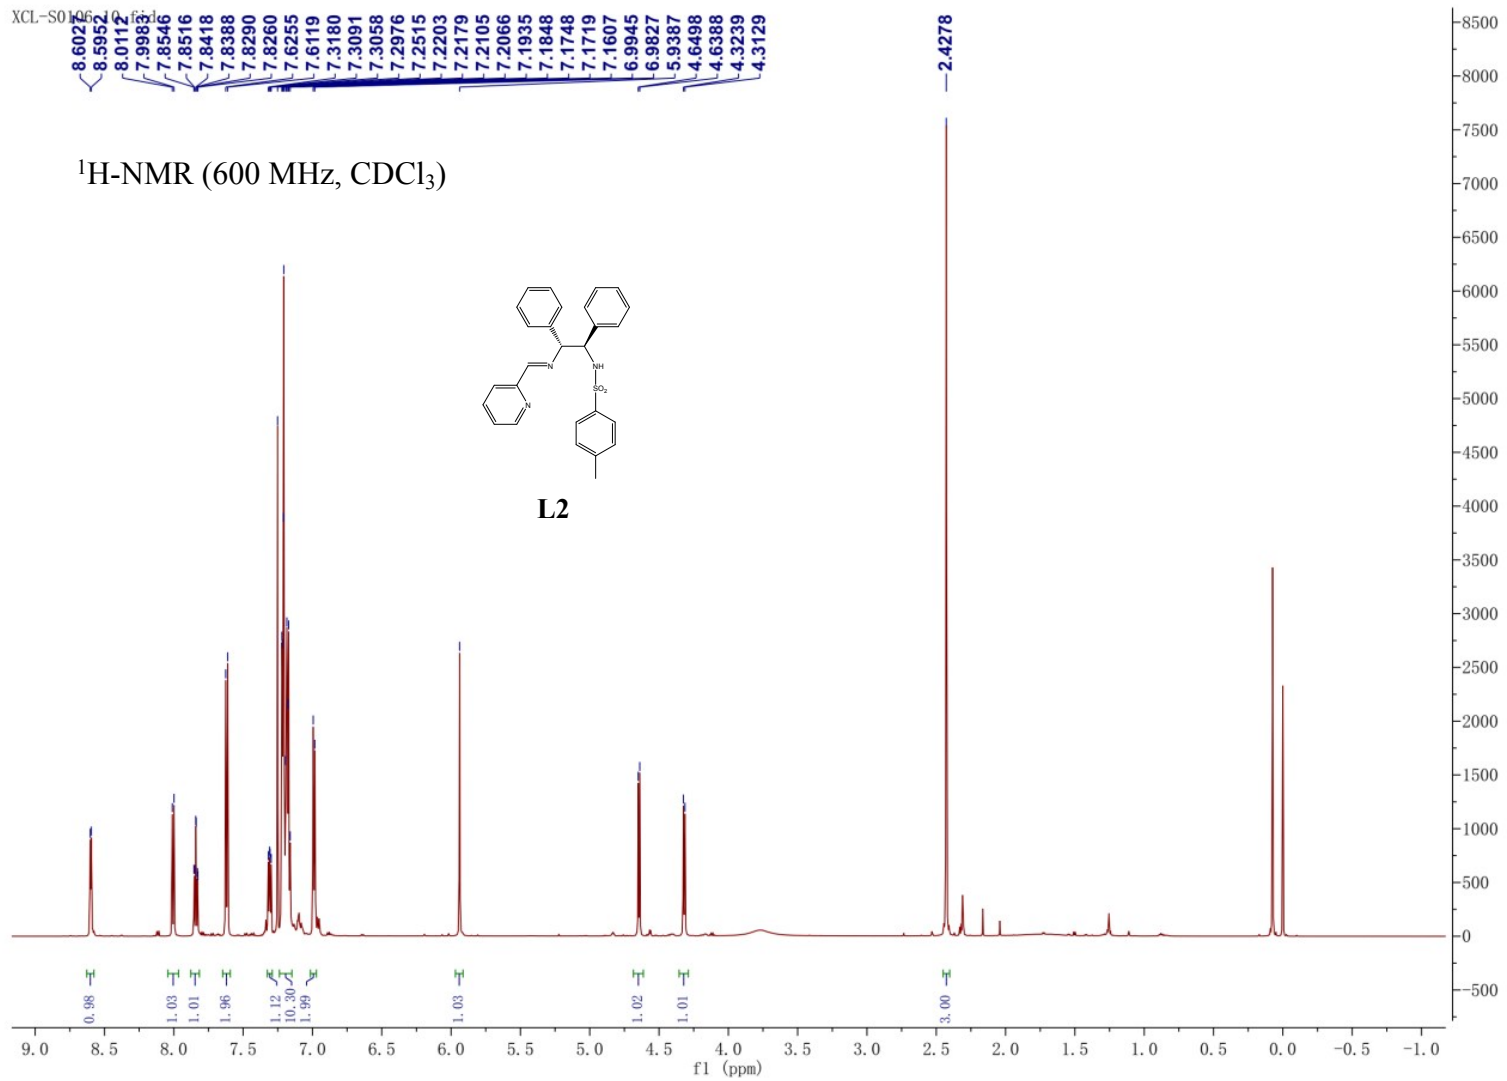

S0108B.10.fid

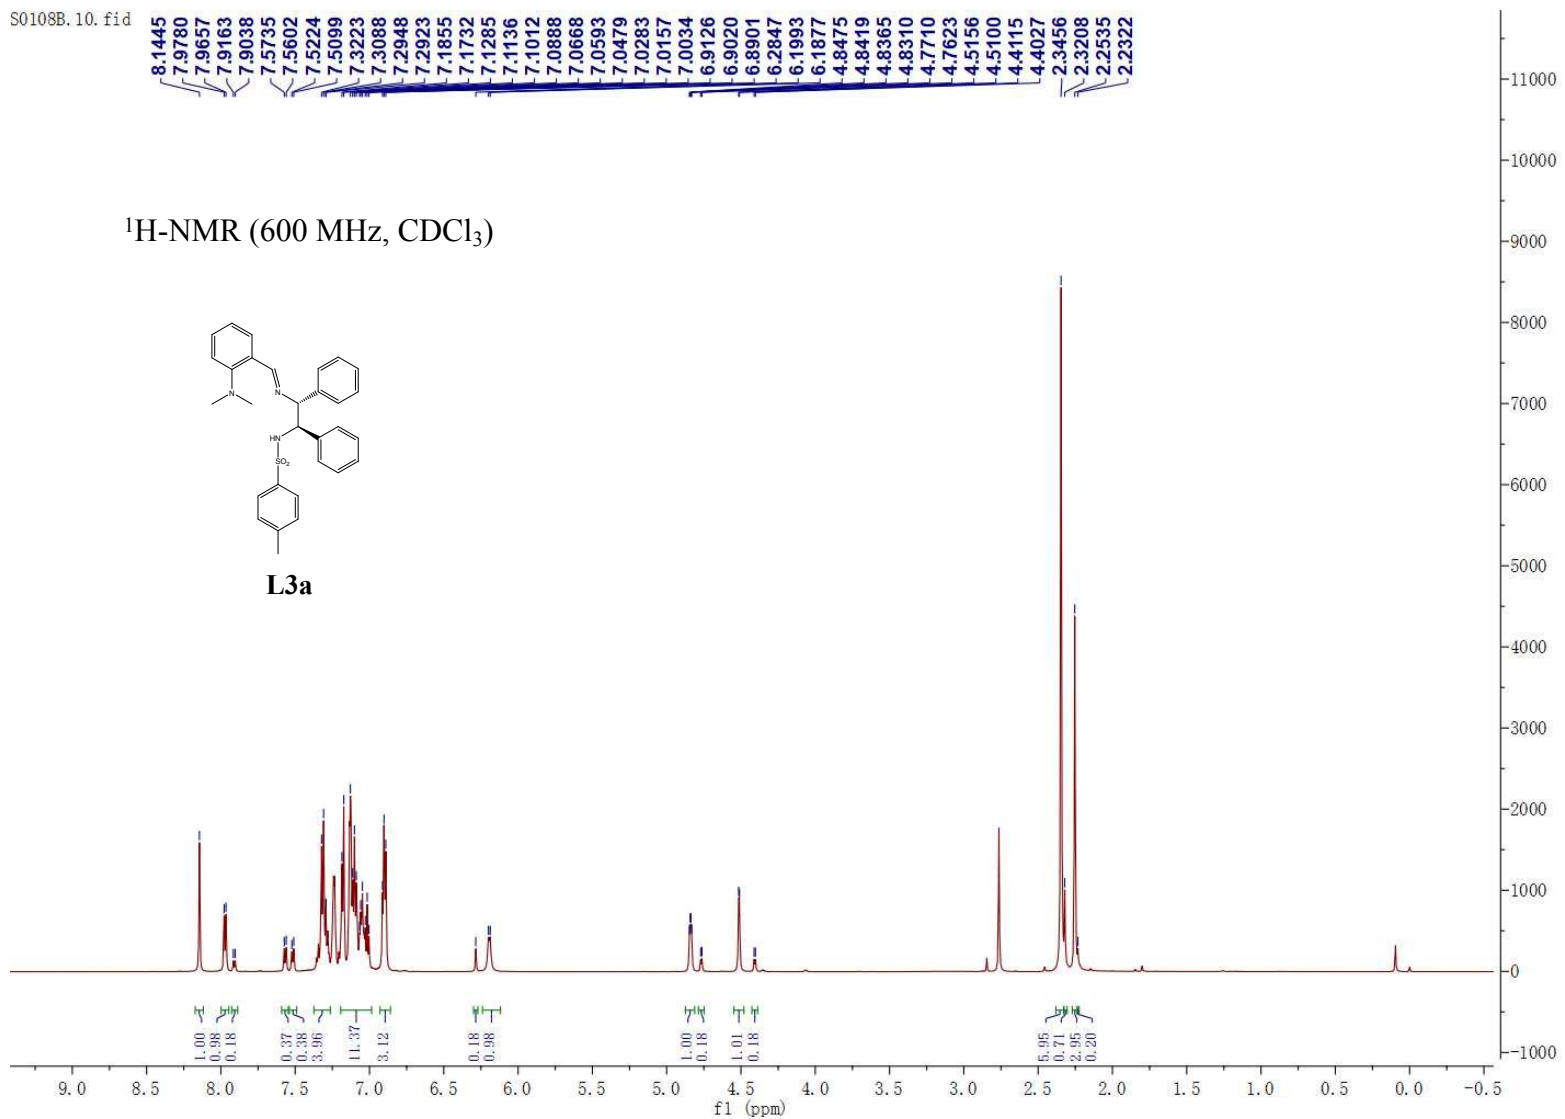



S0108B.11.fid

$^{13}\text{C}$ -NMR (150 MHz,  $\text{CDCl}_3$ )

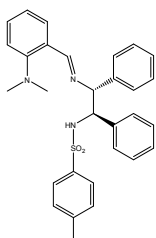

**L3a**

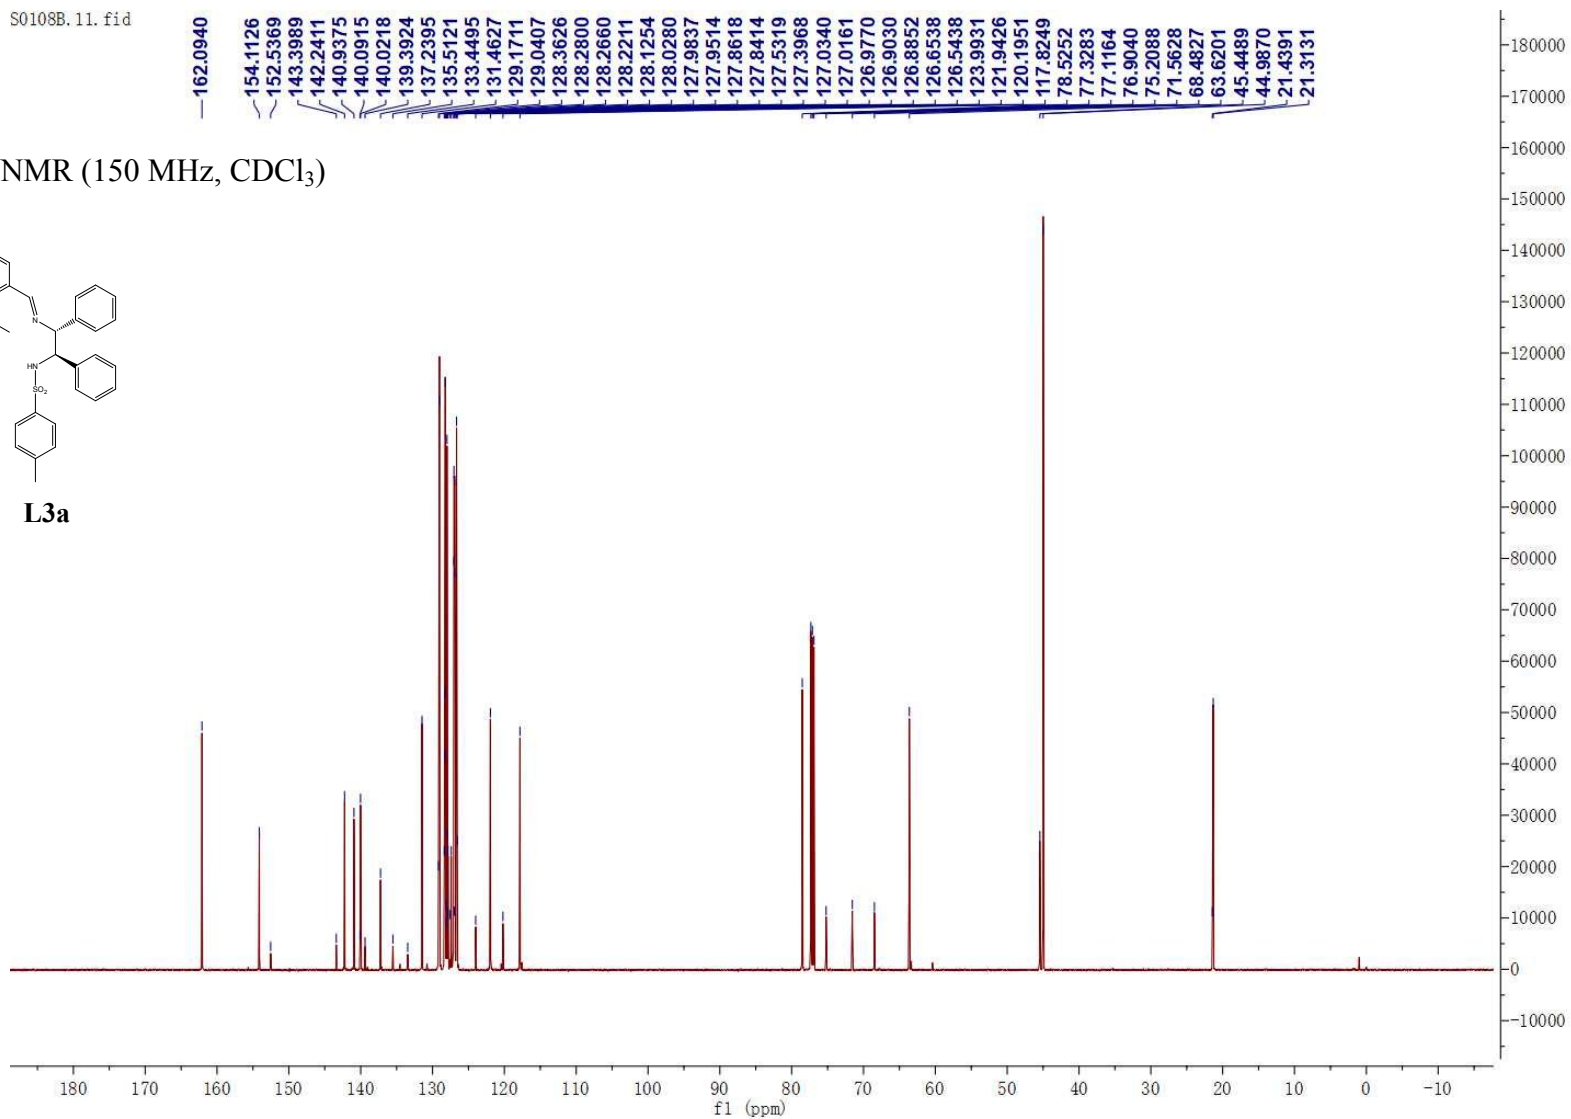

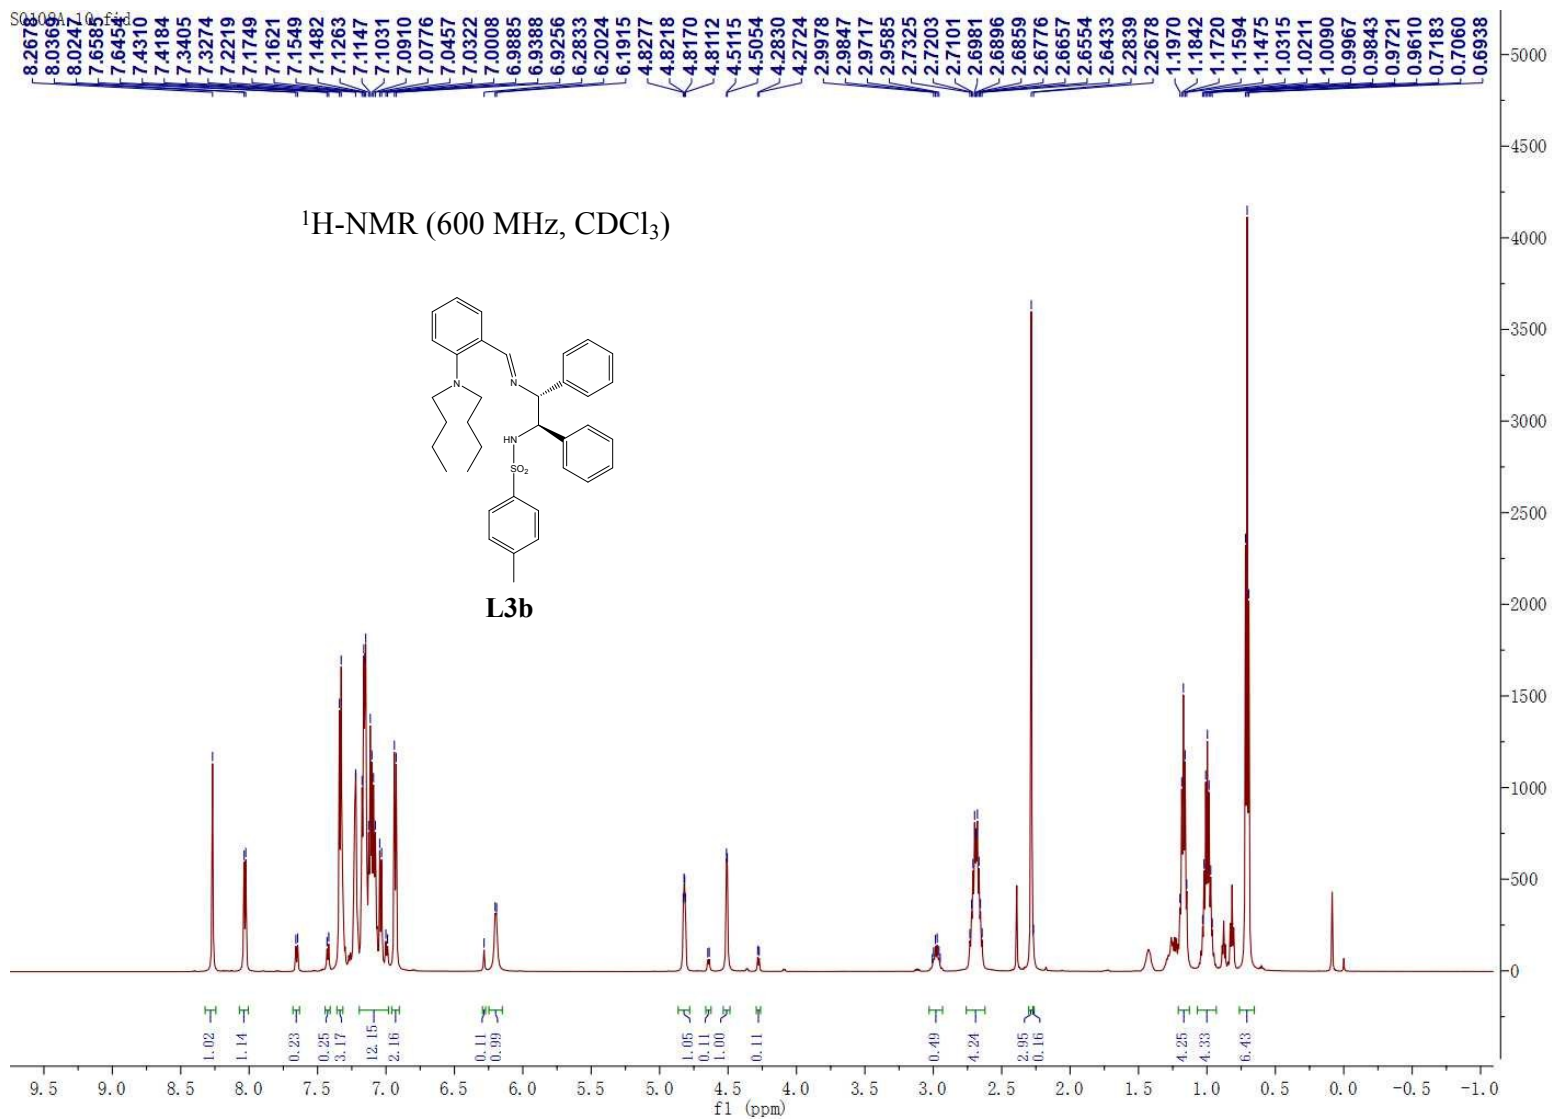

S0108A.11. fid

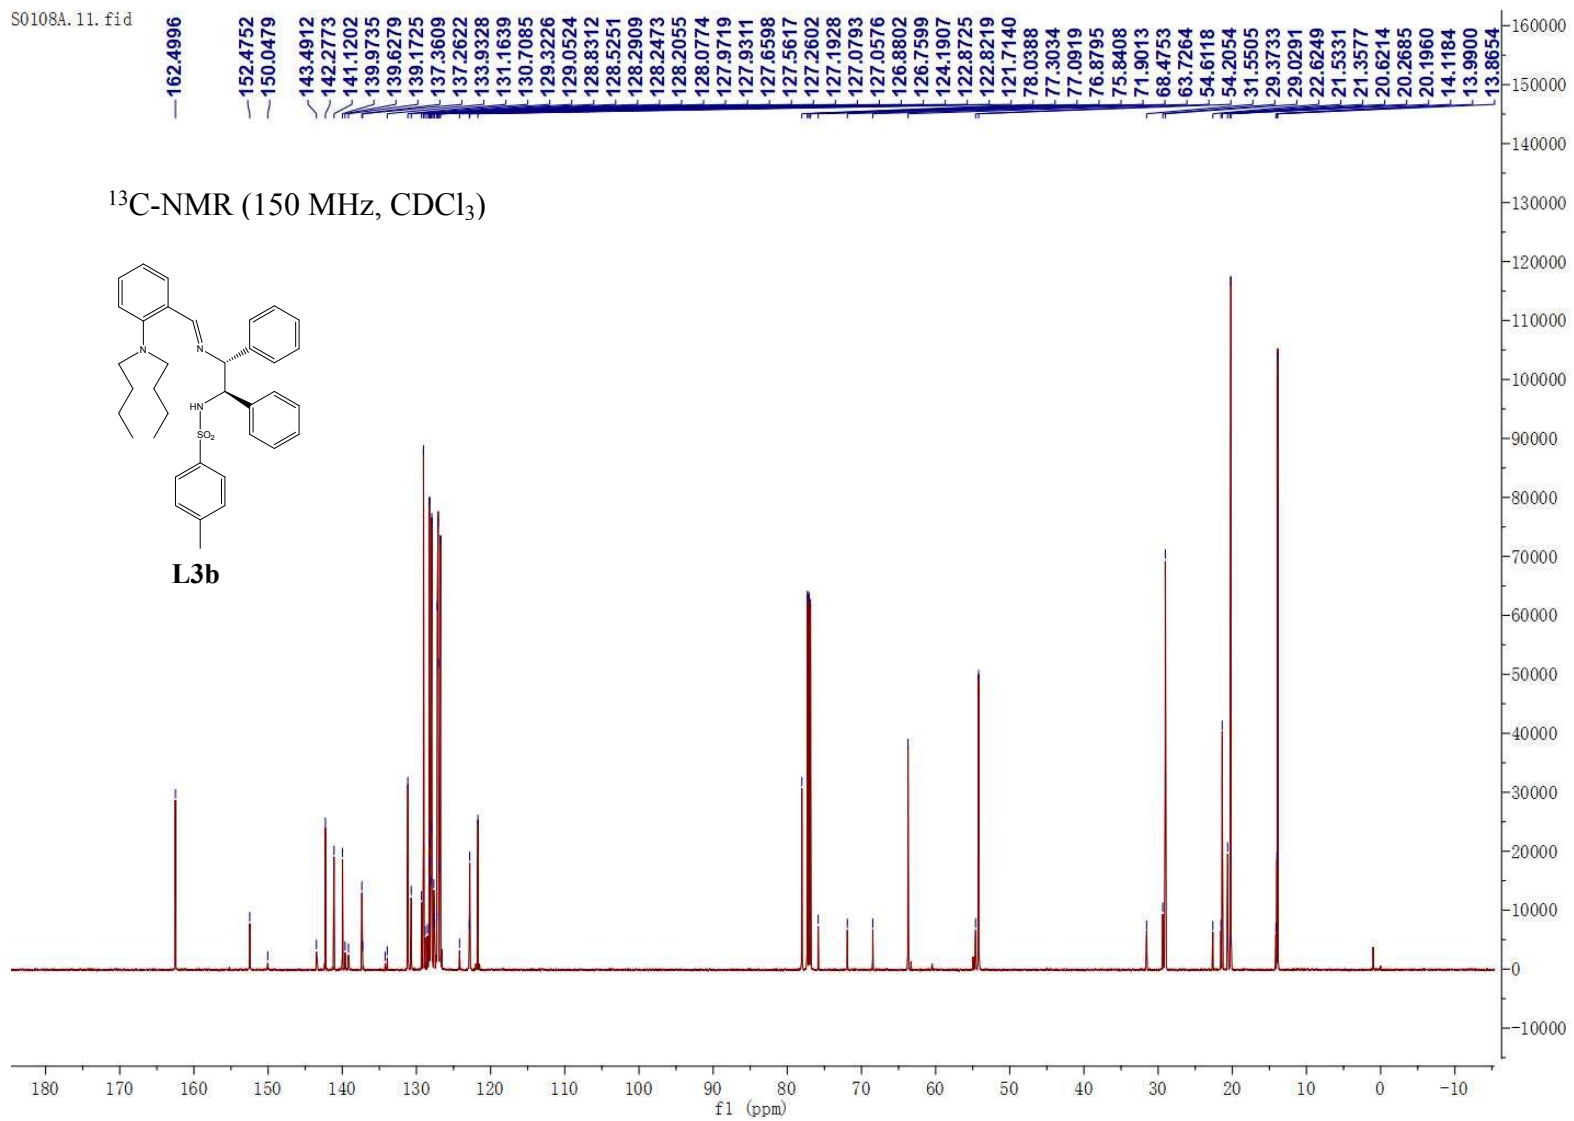

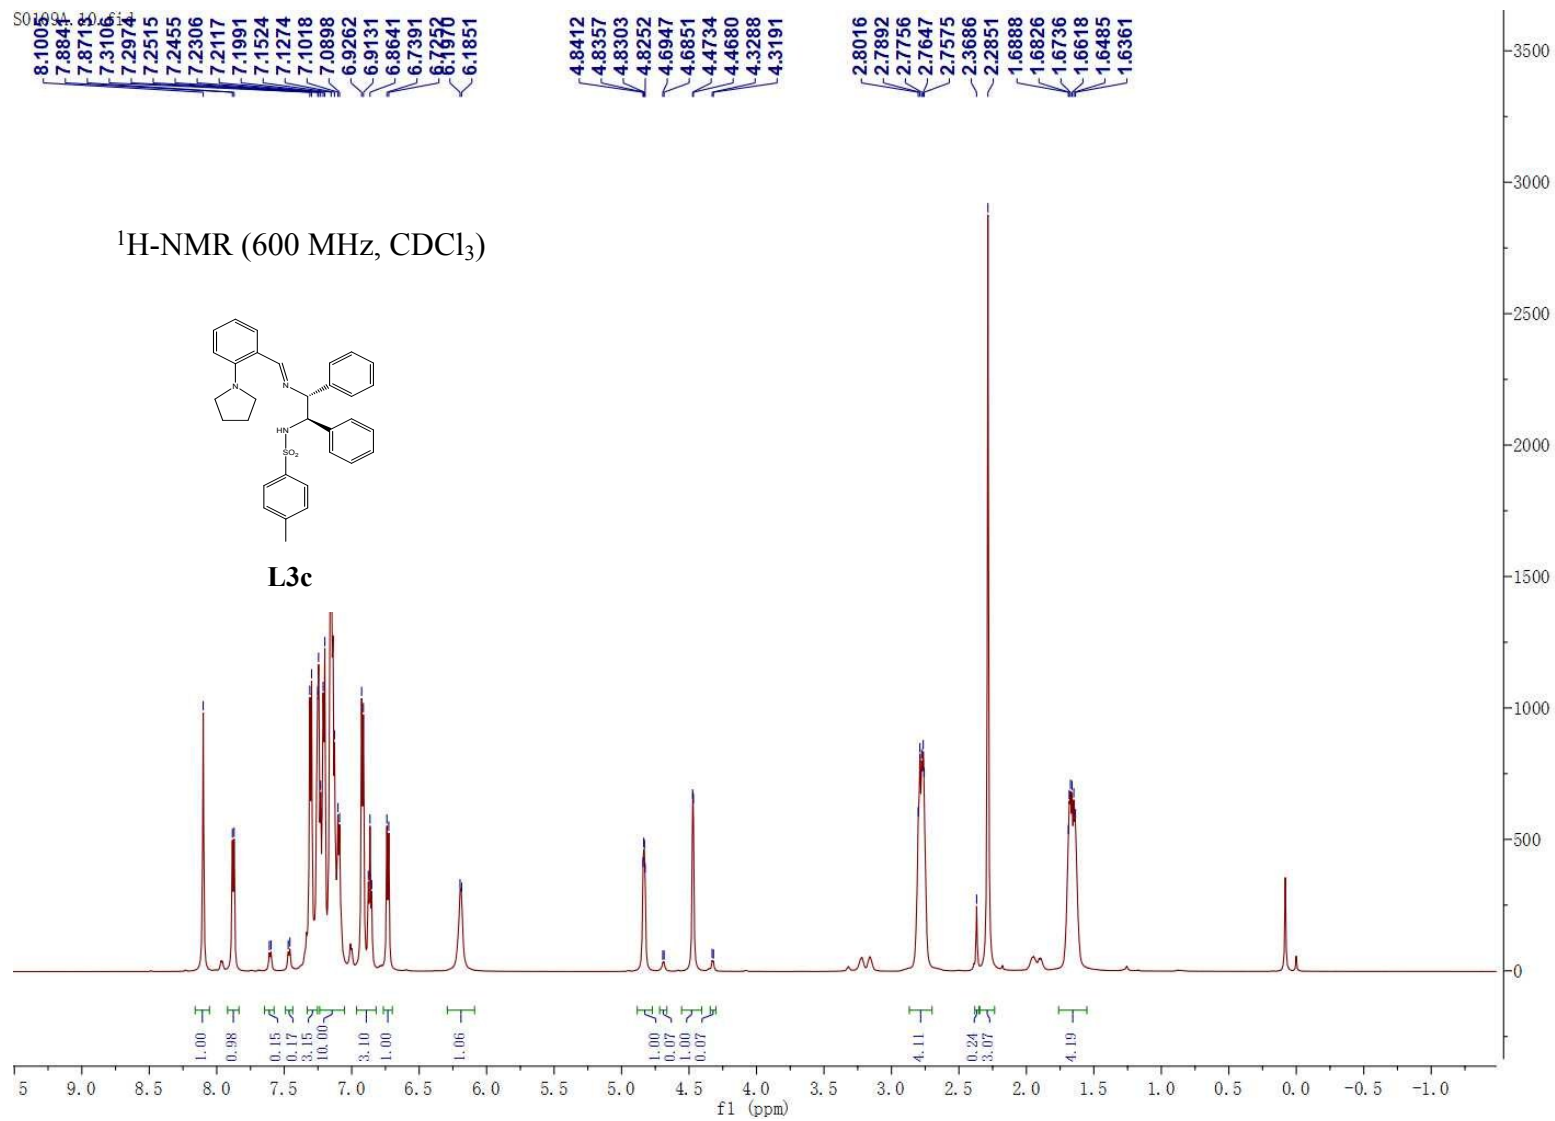

S0109A.11.fid

$^{13}\text{C}$ -NMR (150 MHz,  $\text{CDCl}_3$ )

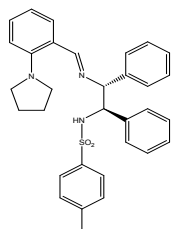

**L3c**

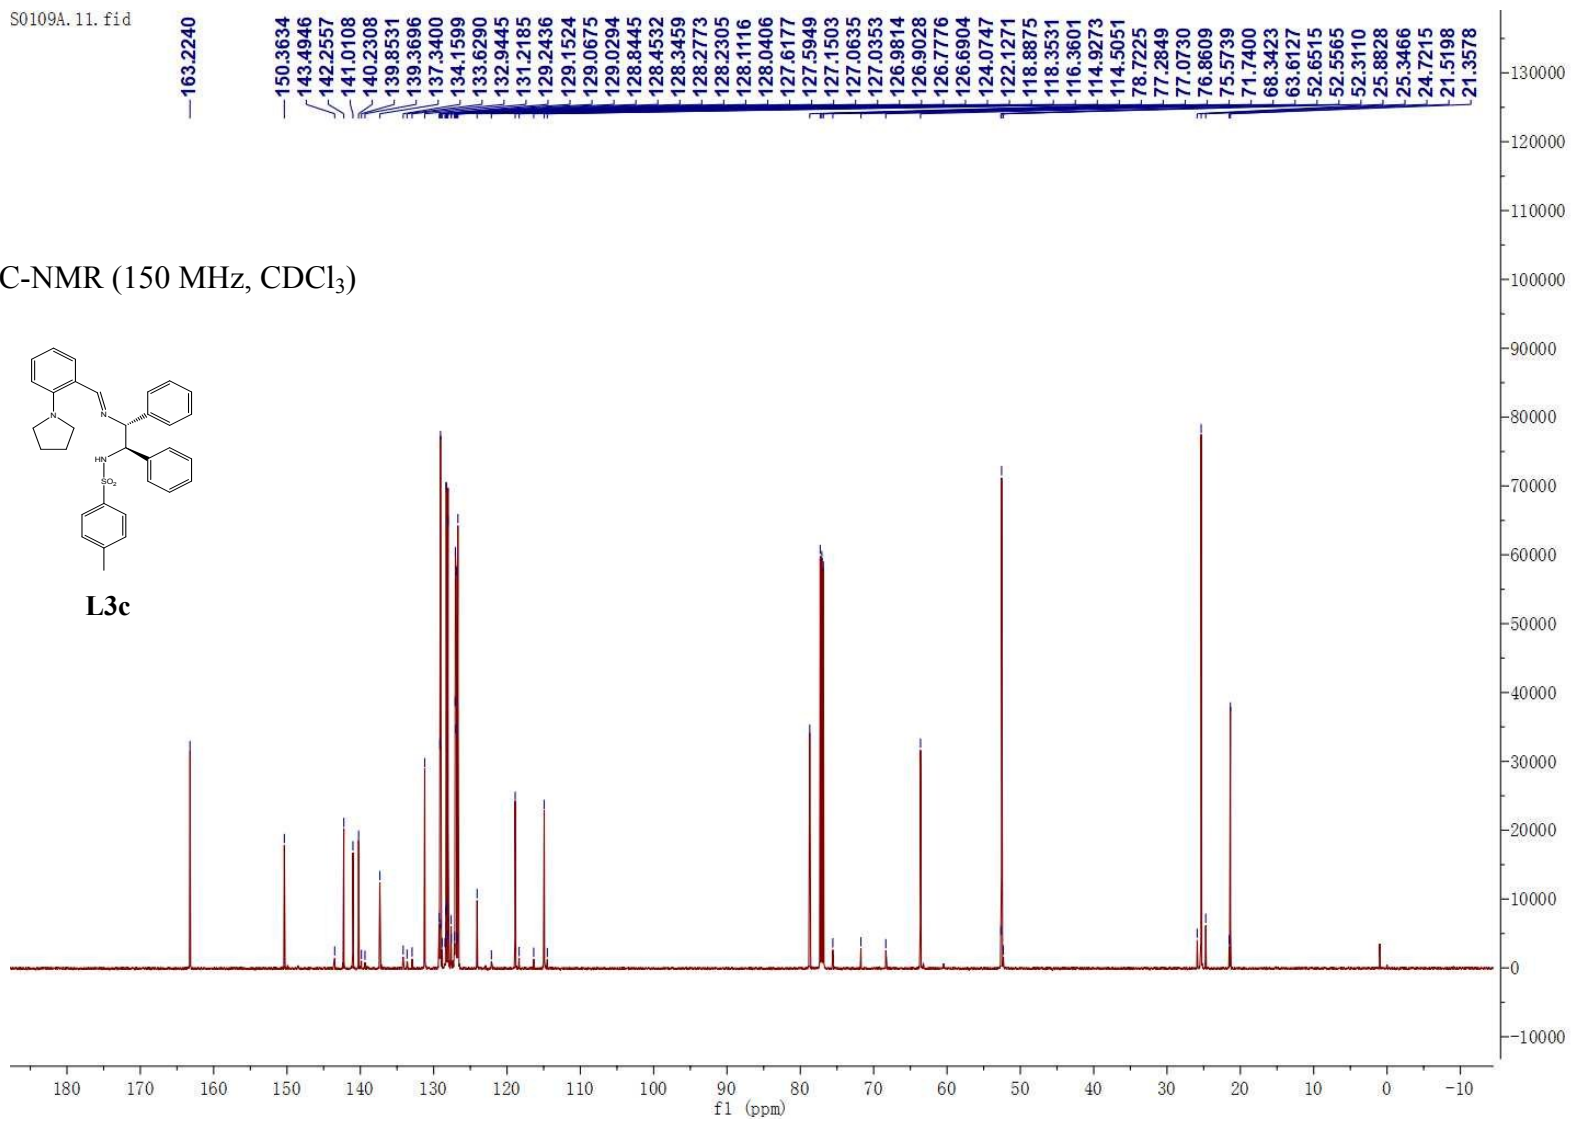

S0109B.10. f1d

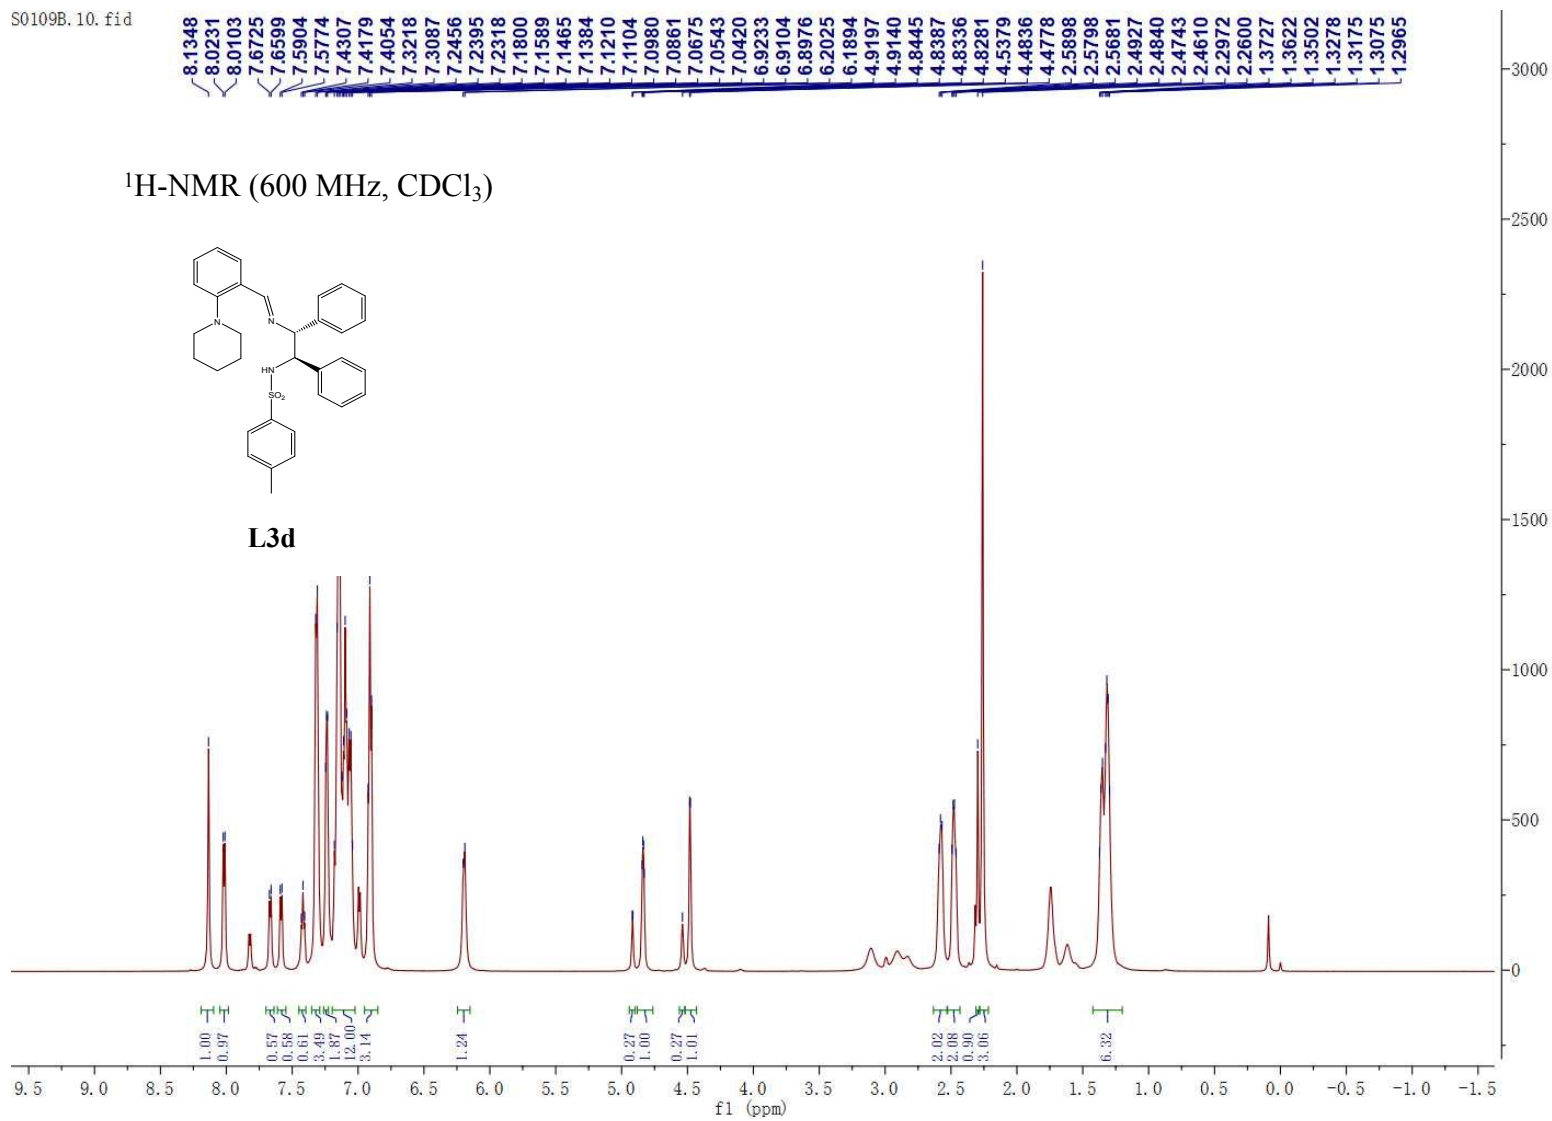

S0109B.11.fid

$^{13}\text{C}$ -NMR (150 MHz,  $\text{CDCl}_3$ )

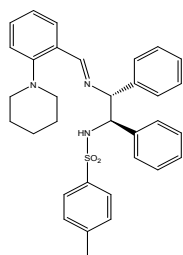

**L3d**

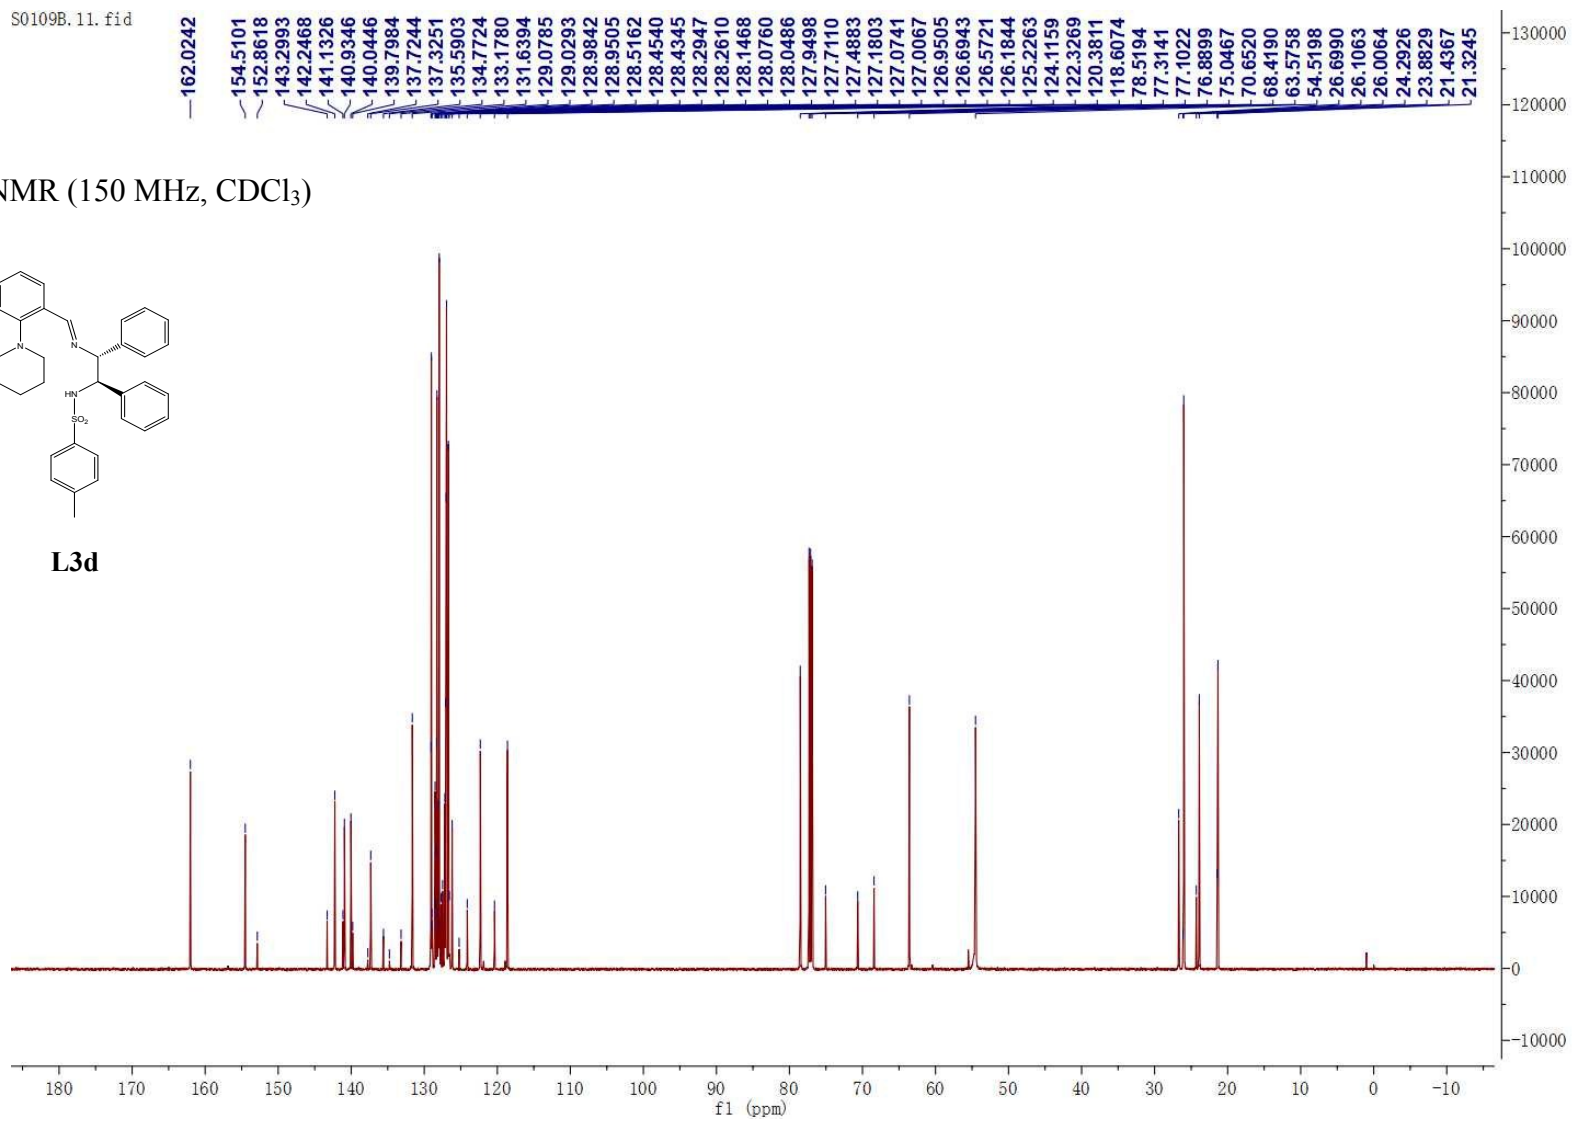

XCL-S58A. 10. fid

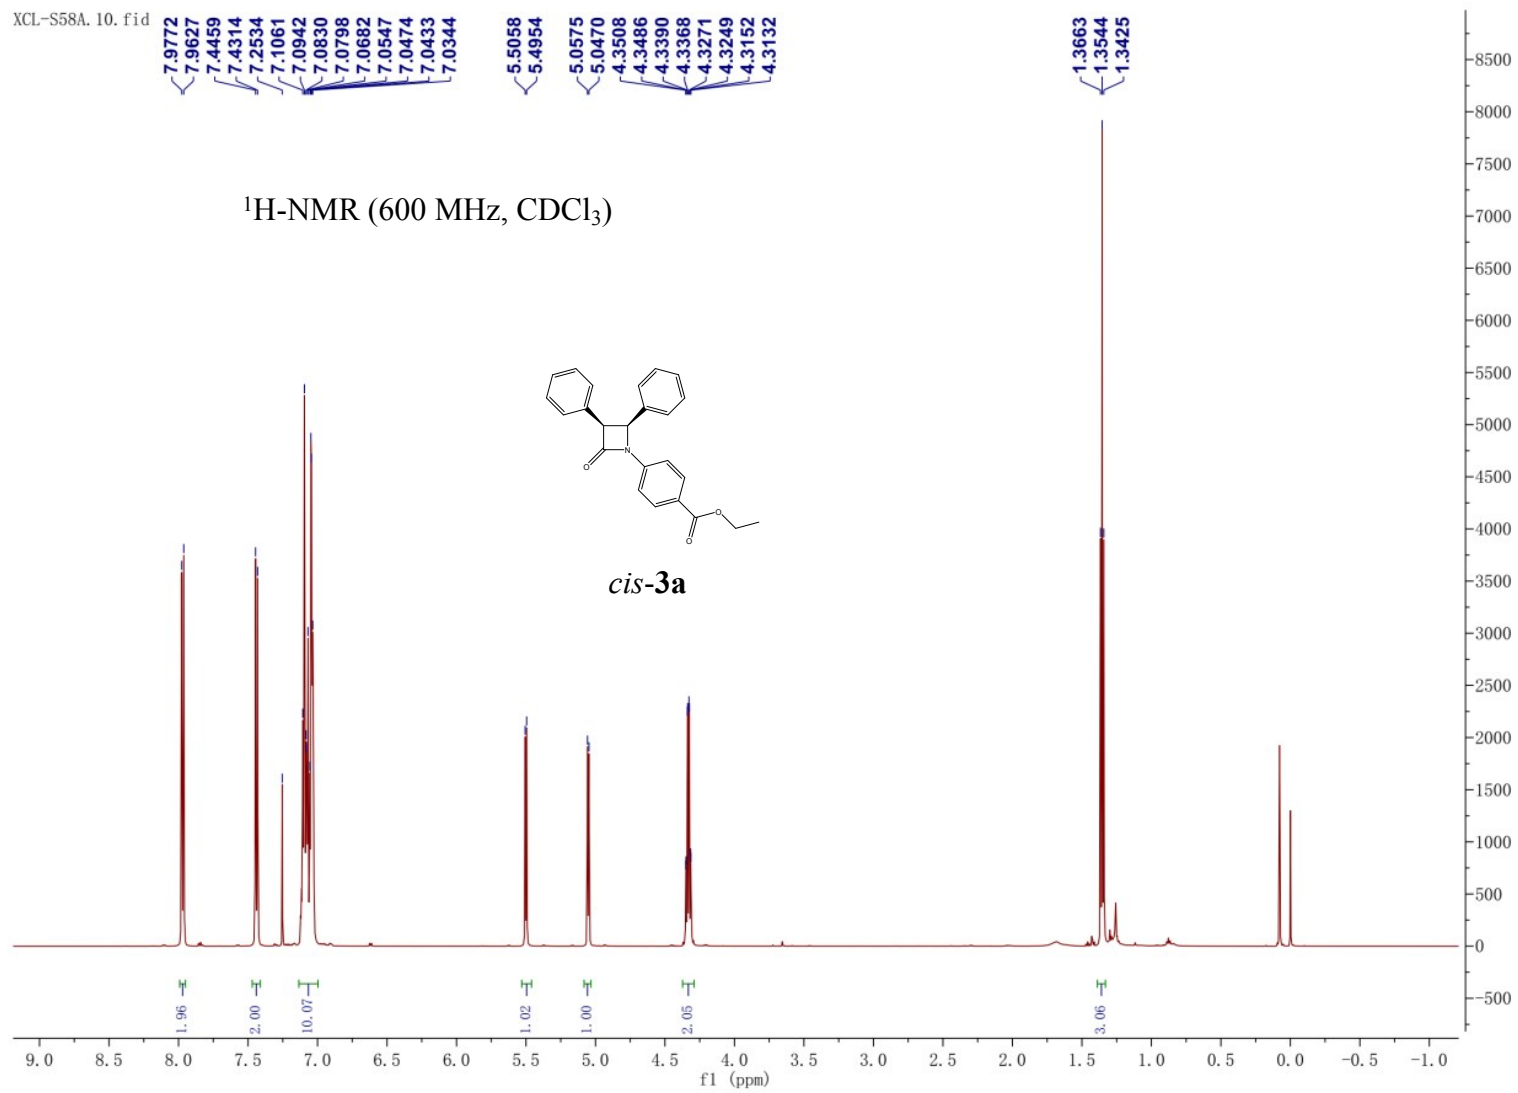



XCL-S58A.11

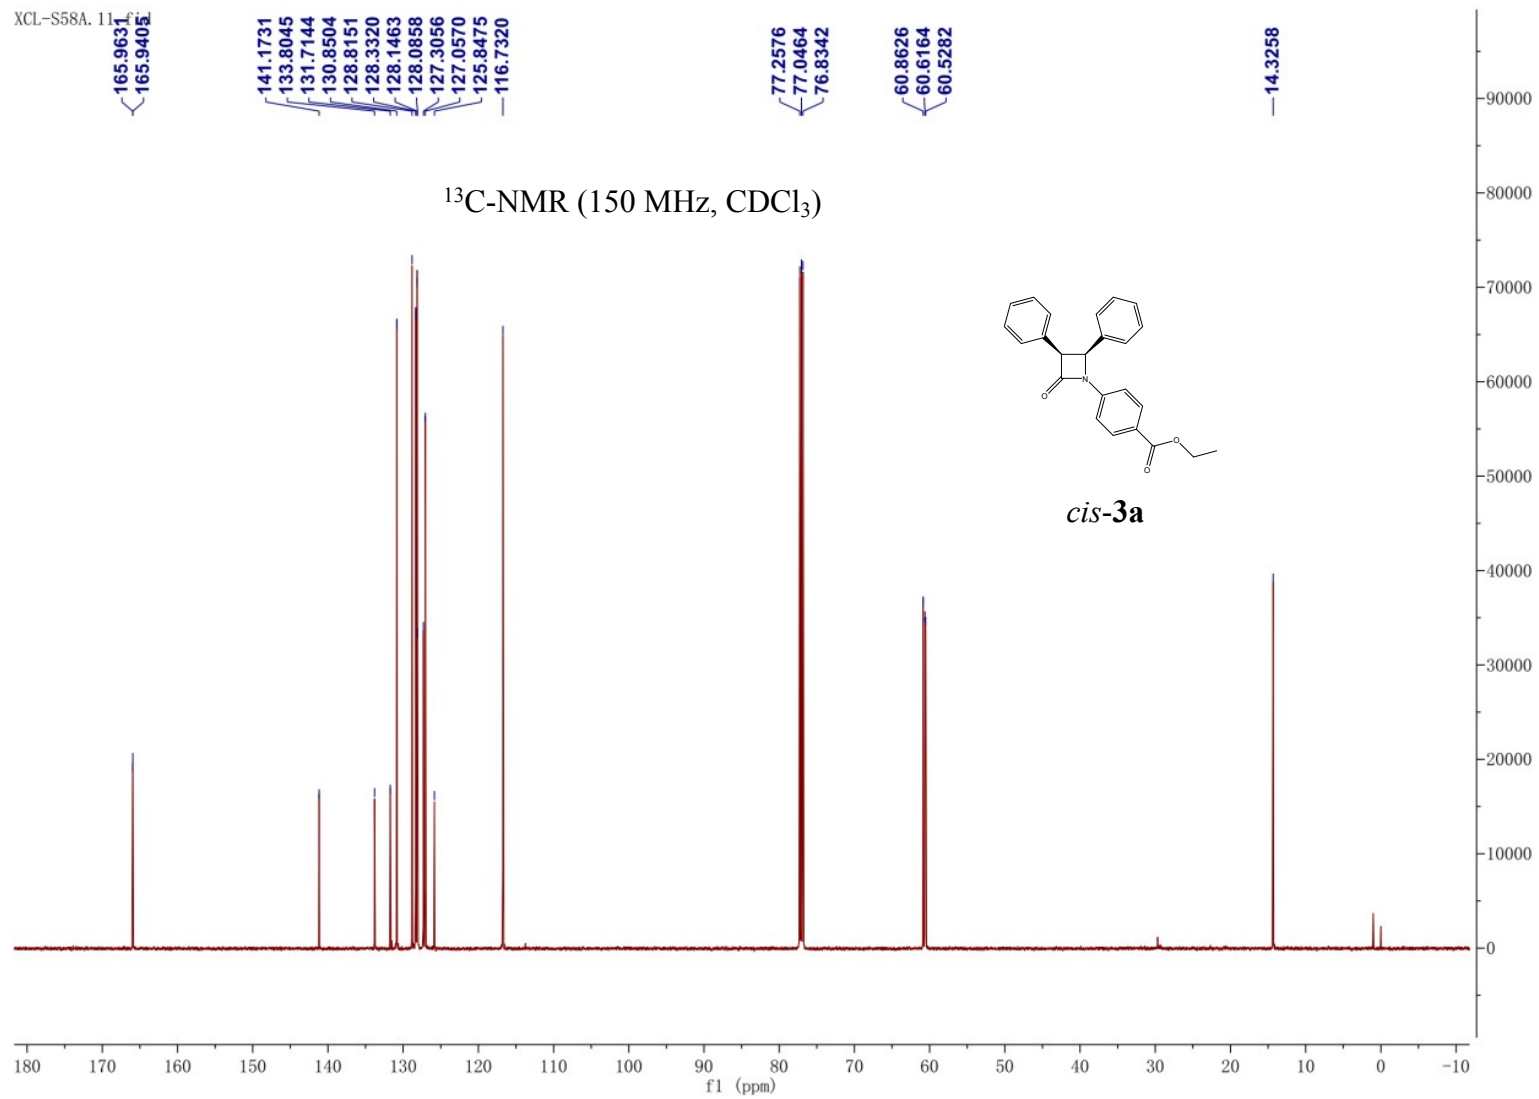

S58B1.10.fid

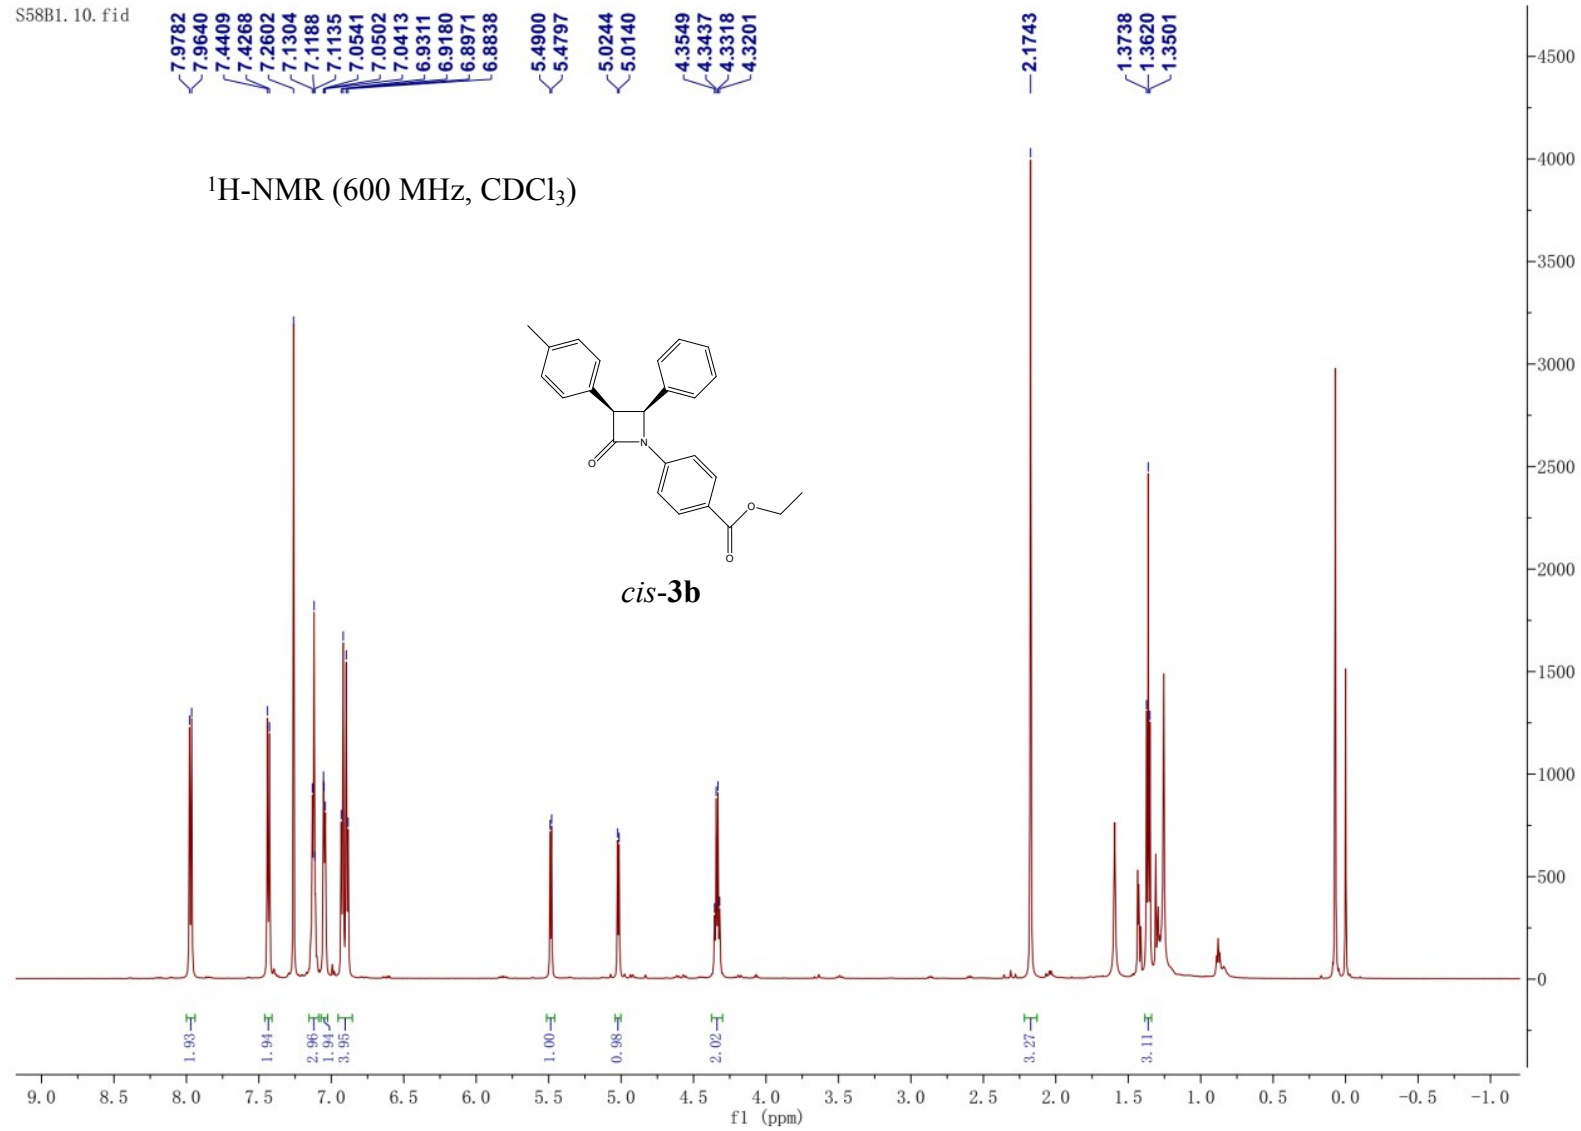

S58B1.11.fid

$^{13}\text{C-NMR}$  (150 MHz,  $\text{CDCl}_3$ )

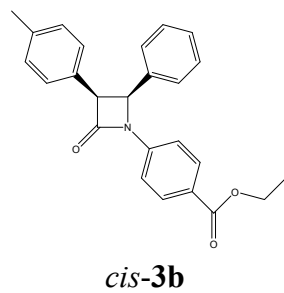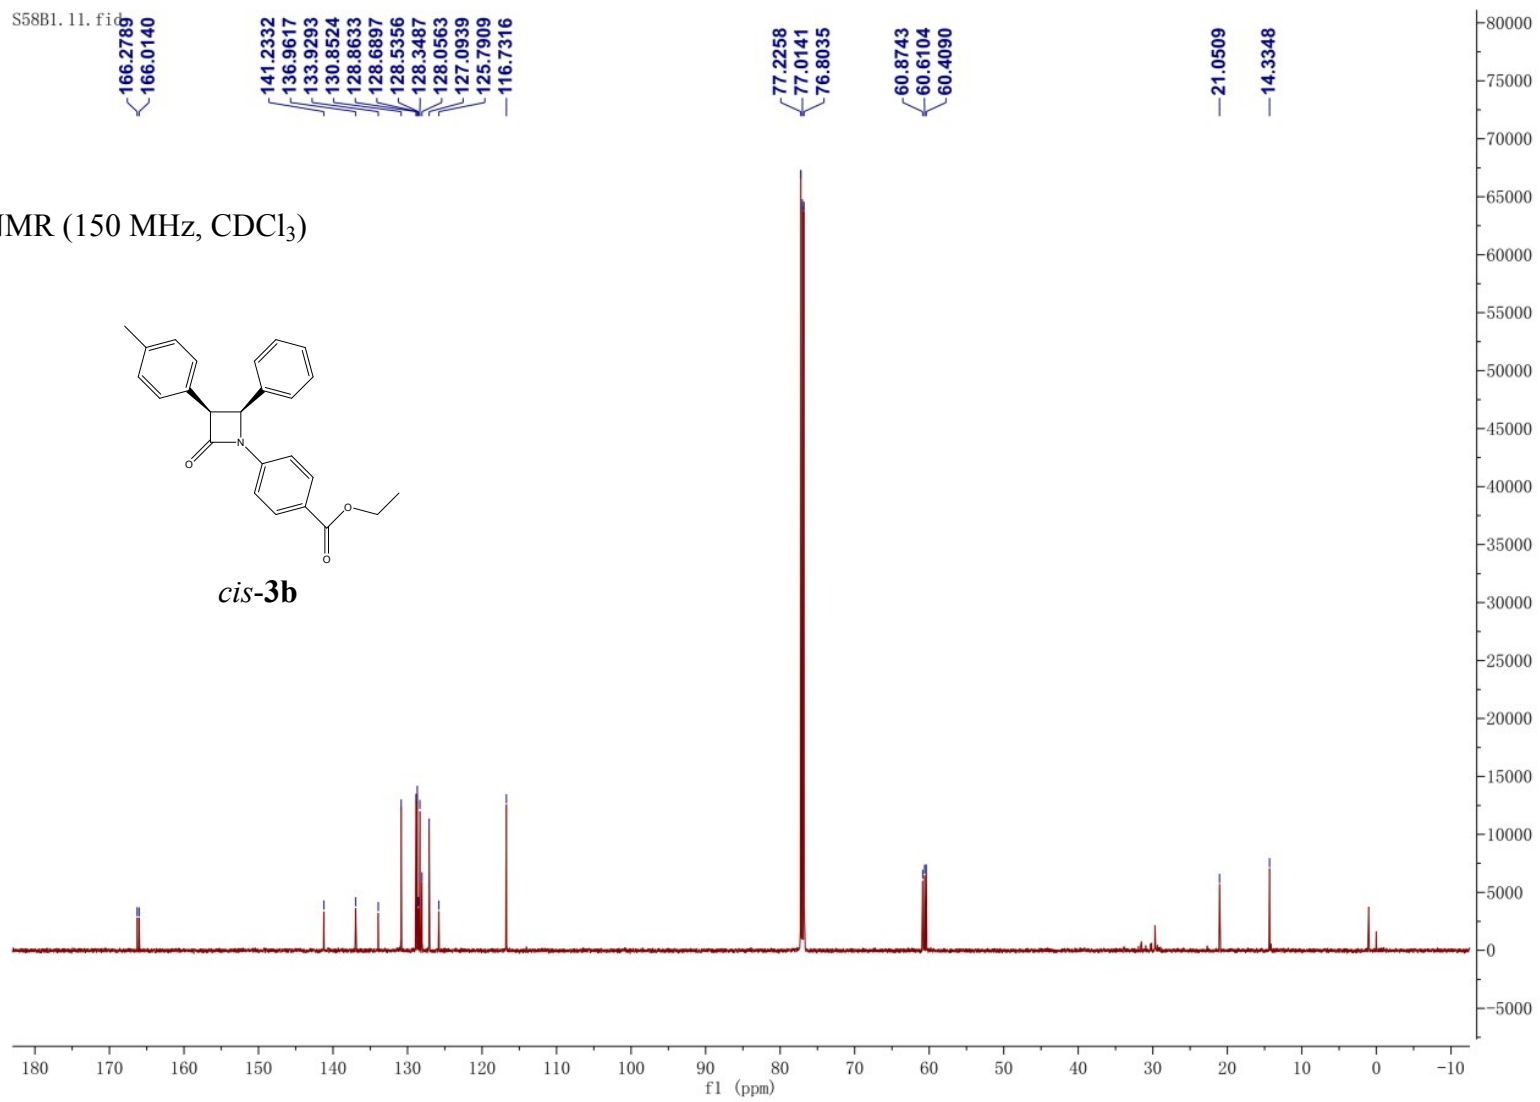

S58Cl. 10. fid

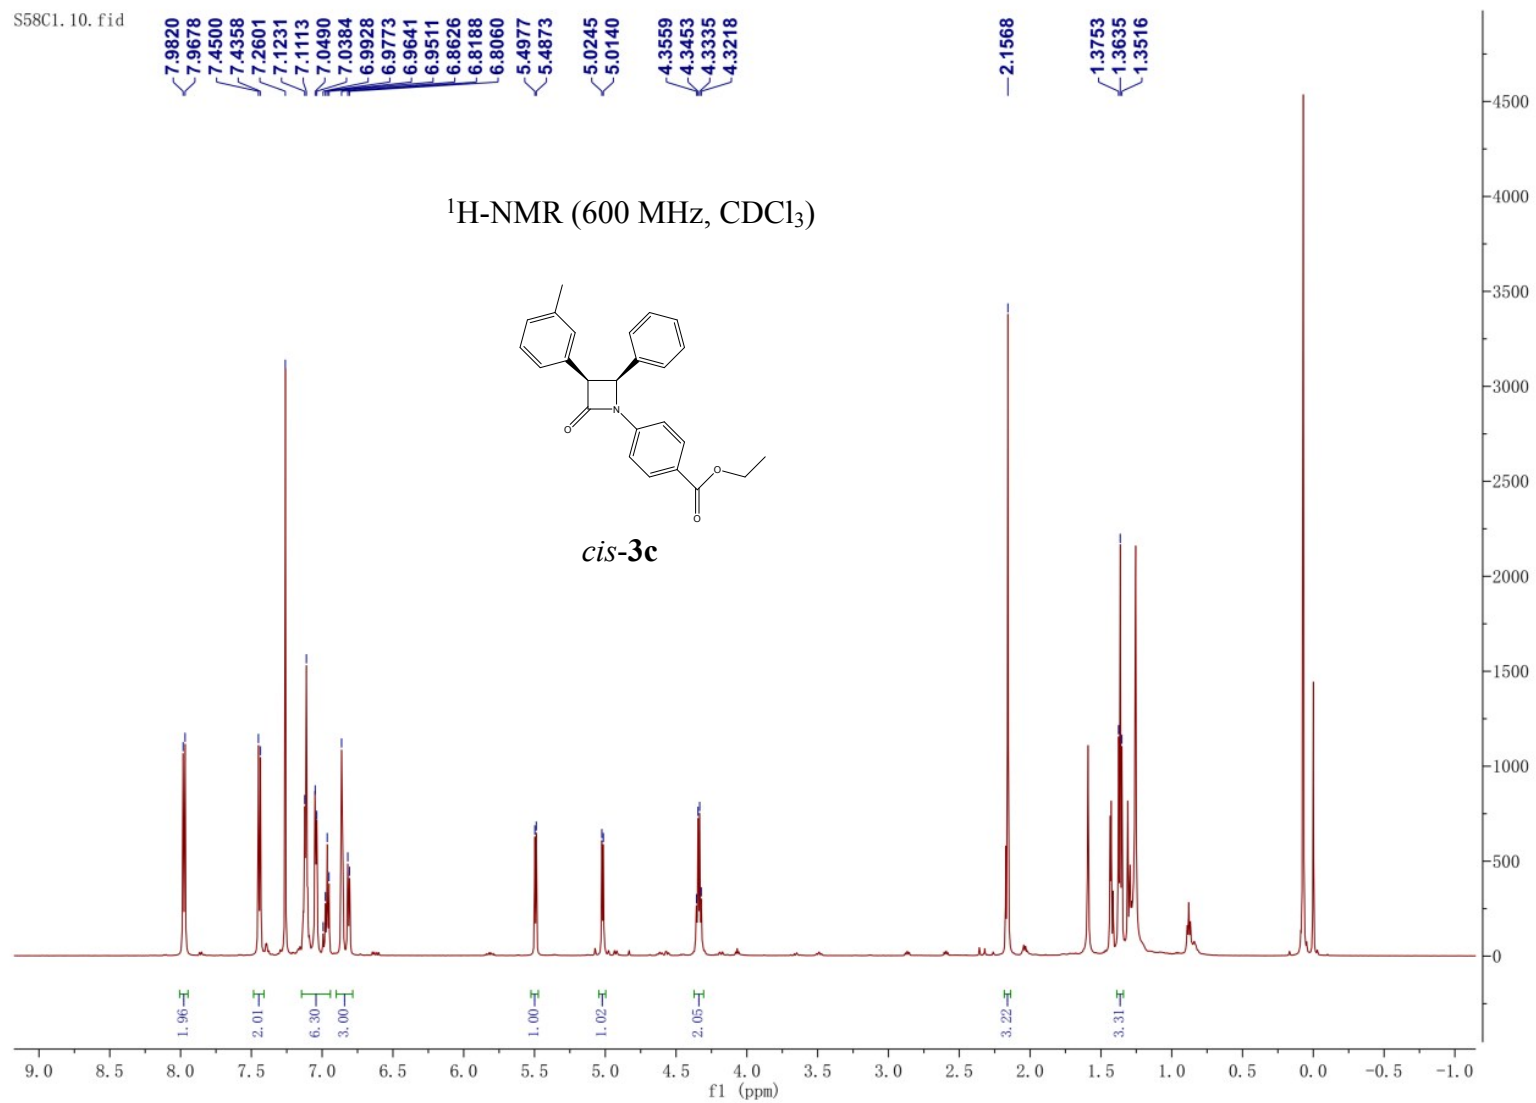

S58Cl. 11. fi

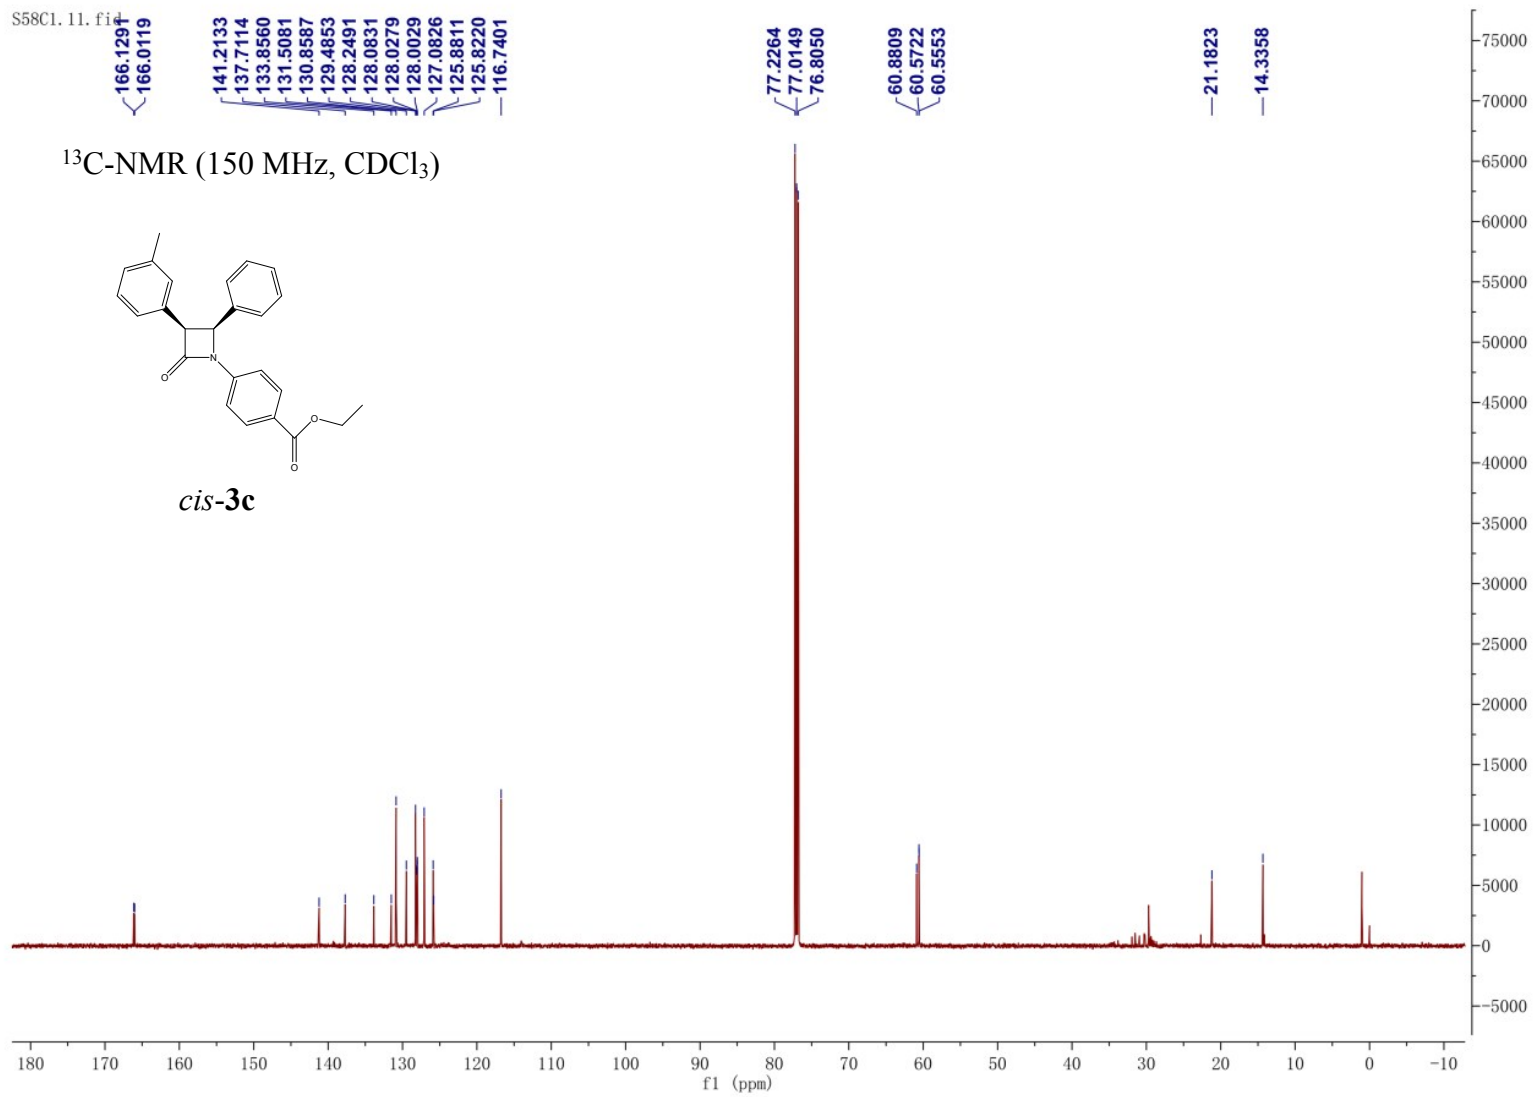

S99Cl.10.fid

7.9849  
7.9703  
7.4396  
7.4251  
7.2603  
7.1409  
7.1377  
7.1323  
7.1290  
7.0336  
7.0279  
7.0189  
7.0139  
7.0084  
7.0052  
6.7984  
6.7839  
6.7695  
5.5029  
5.4925  
5.0335  
5.0233  
4.3595  
4.3573  
4.3477  
4.3455  
4.3358  
4.3337  
4.3238  
4.3218

1.3753  
1.3634  
1.3515

$^1\text{H-NMR}$  (600 MHz,  $\text{CDCl}_3$ )

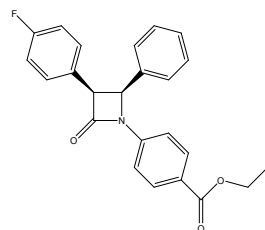

*cis-3d*

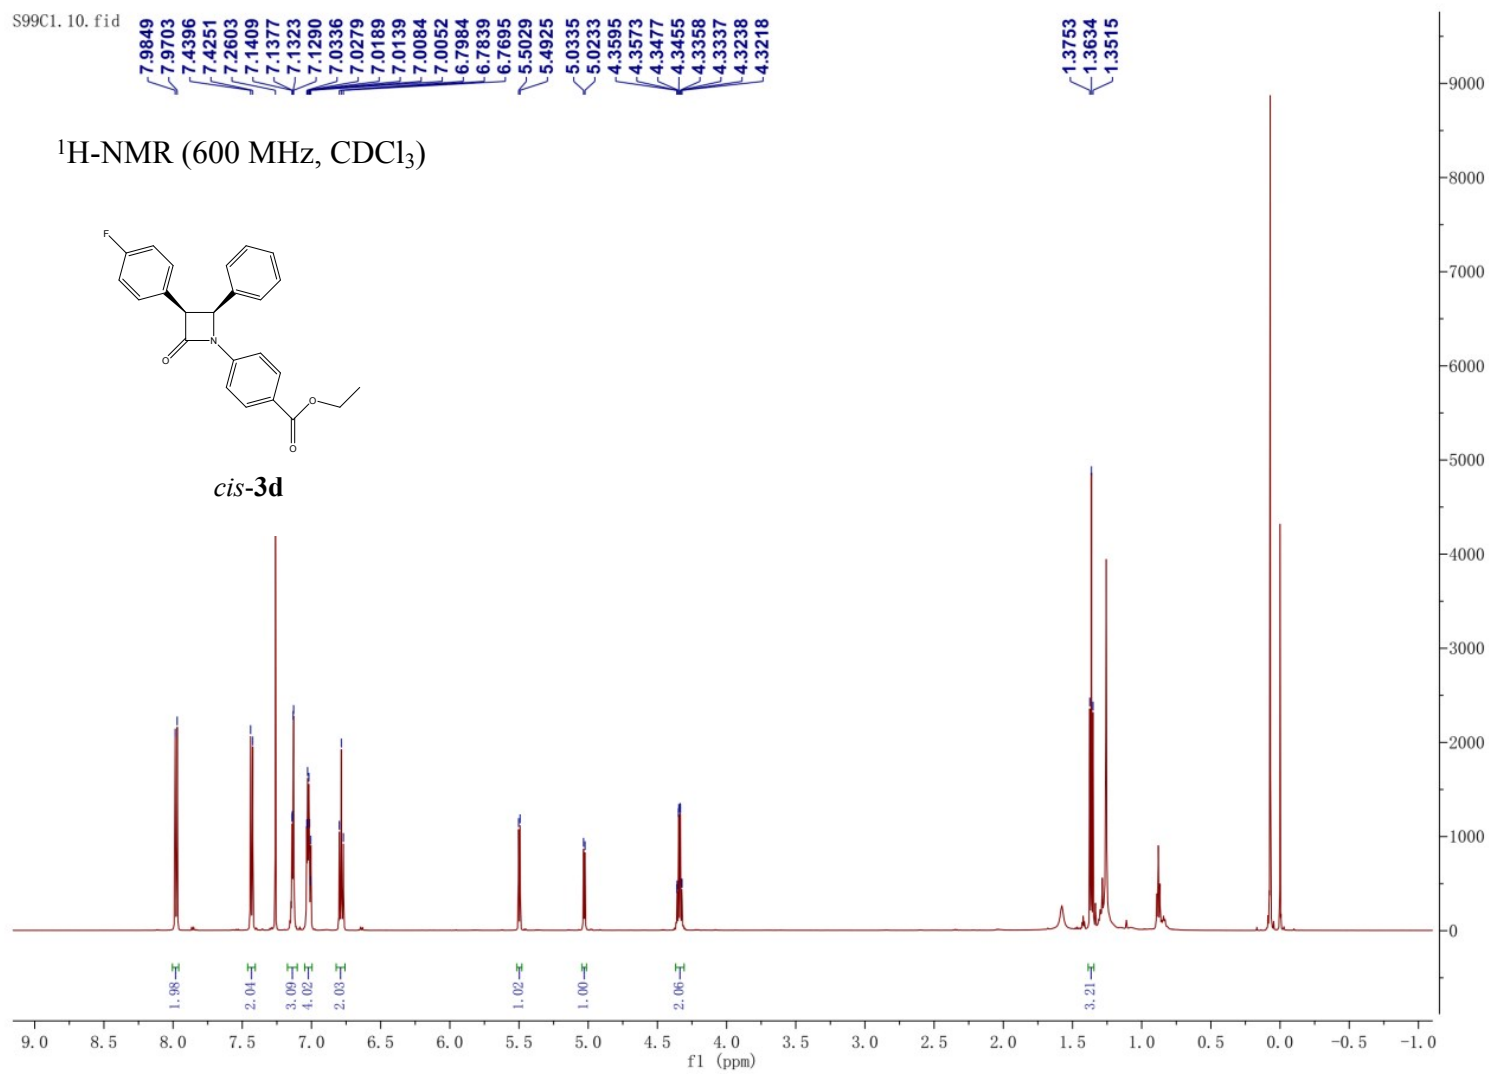

S99Cl. 11. fi

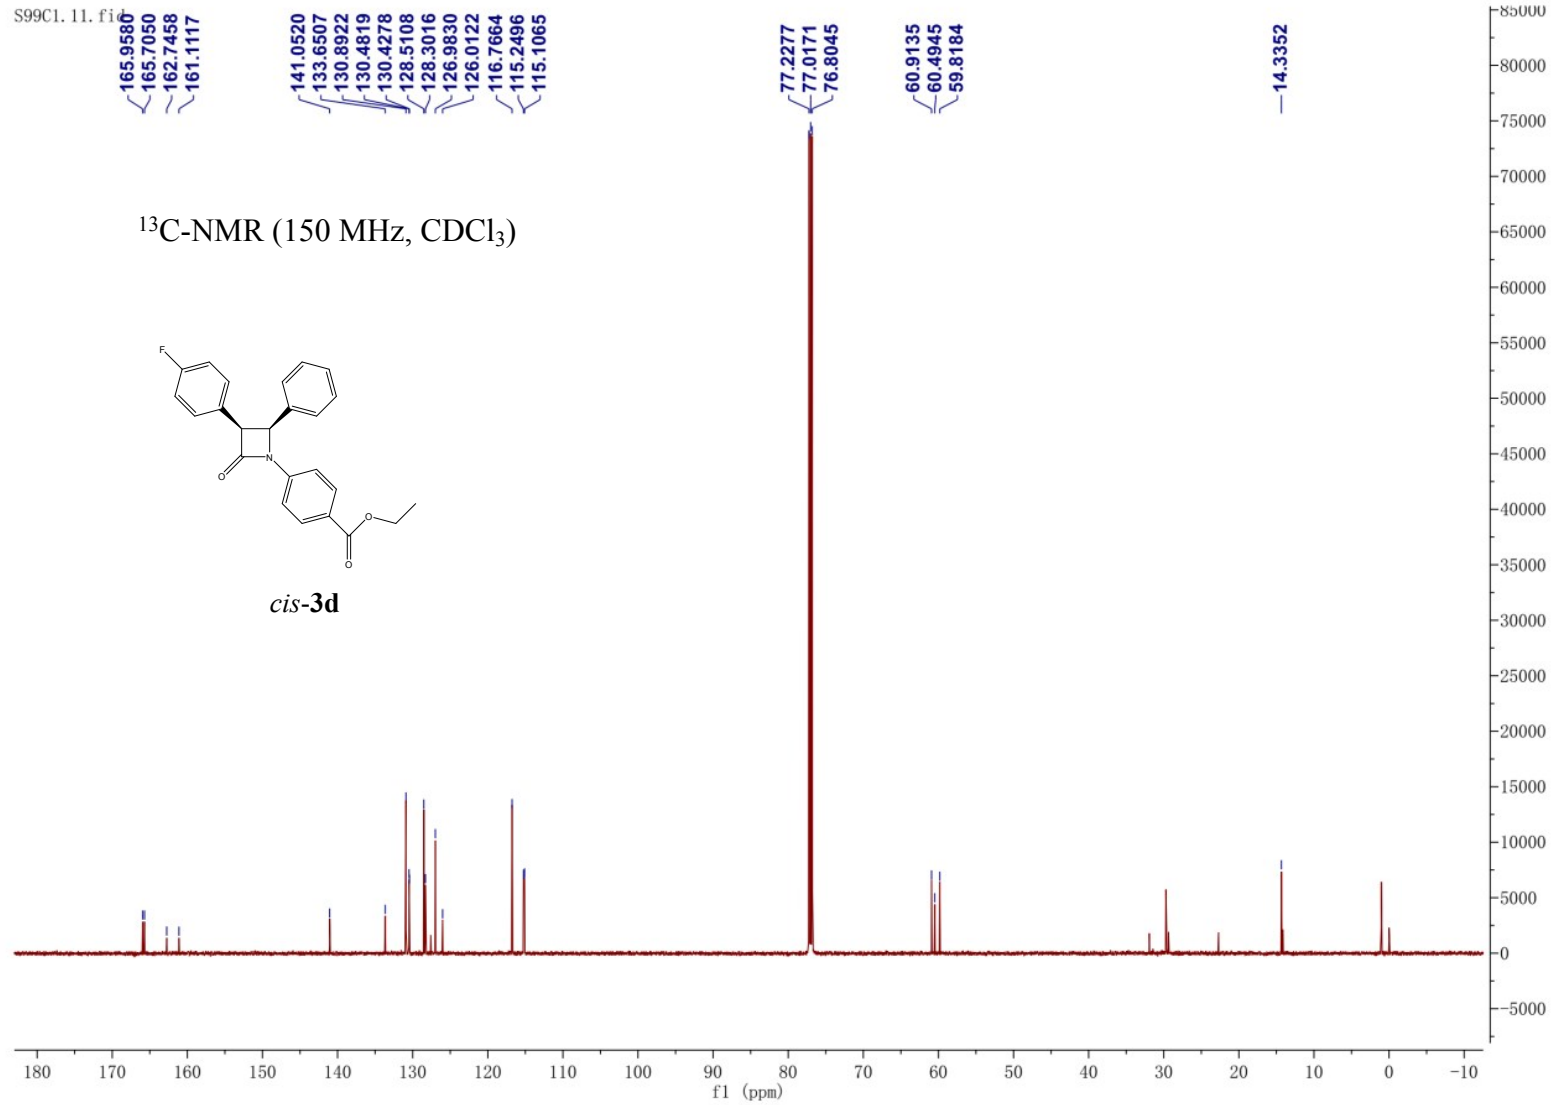

S98B. 20. fid

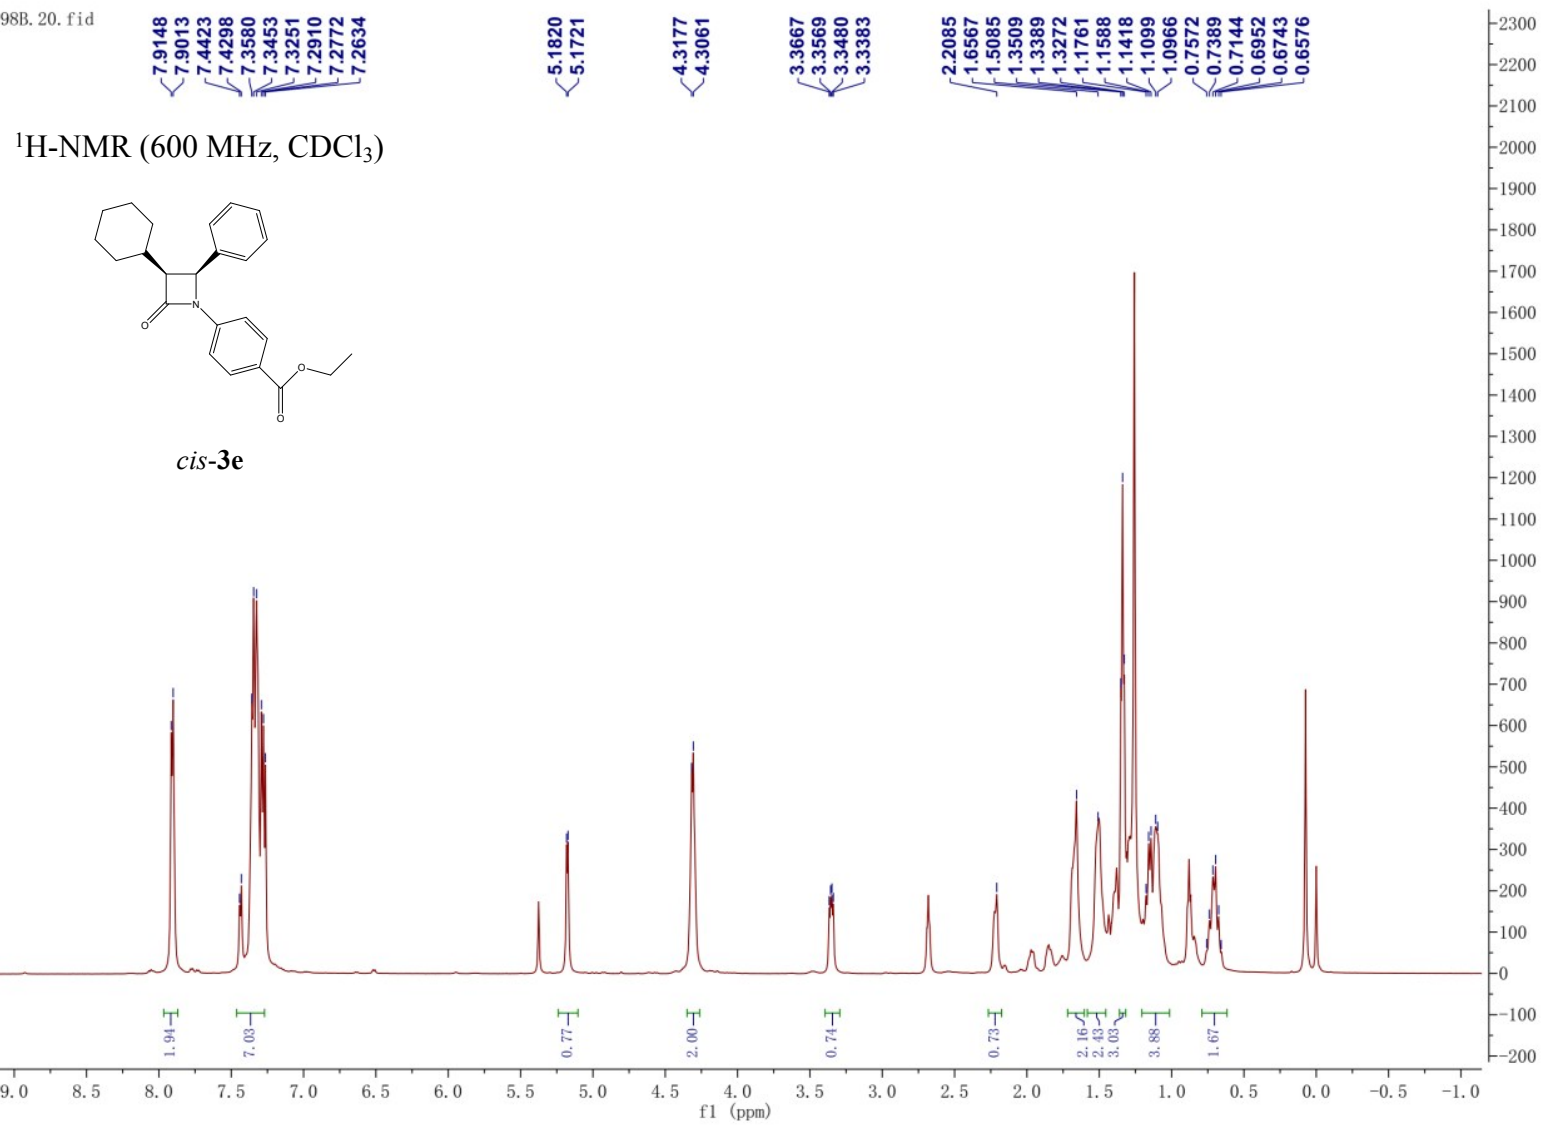



S98B. 21. f1.d

167.7457  
166.0452

141.1070  
137.1754  
134.5536  
130.7902  
130.7540  
129.0249  
128.6582  
128.5779  
125.3386  
124.9068  
116.5801  
115.9150

77.2514  
77.0397  
76.8278

62.6336  
60.7773  
60.7388  
60.7105  
58.5716

34.8626  
31.1224  
30.6581  
29.6992  
29.6580  
26.1070  
25.5418  
25.3598  
14.3224

$^{13}\text{C-NMR}$  (150 MHz,  $\text{CDCl}_3$ )

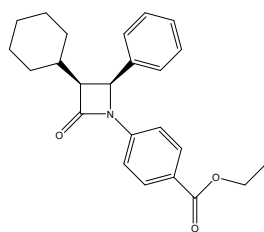

*cis-3e*

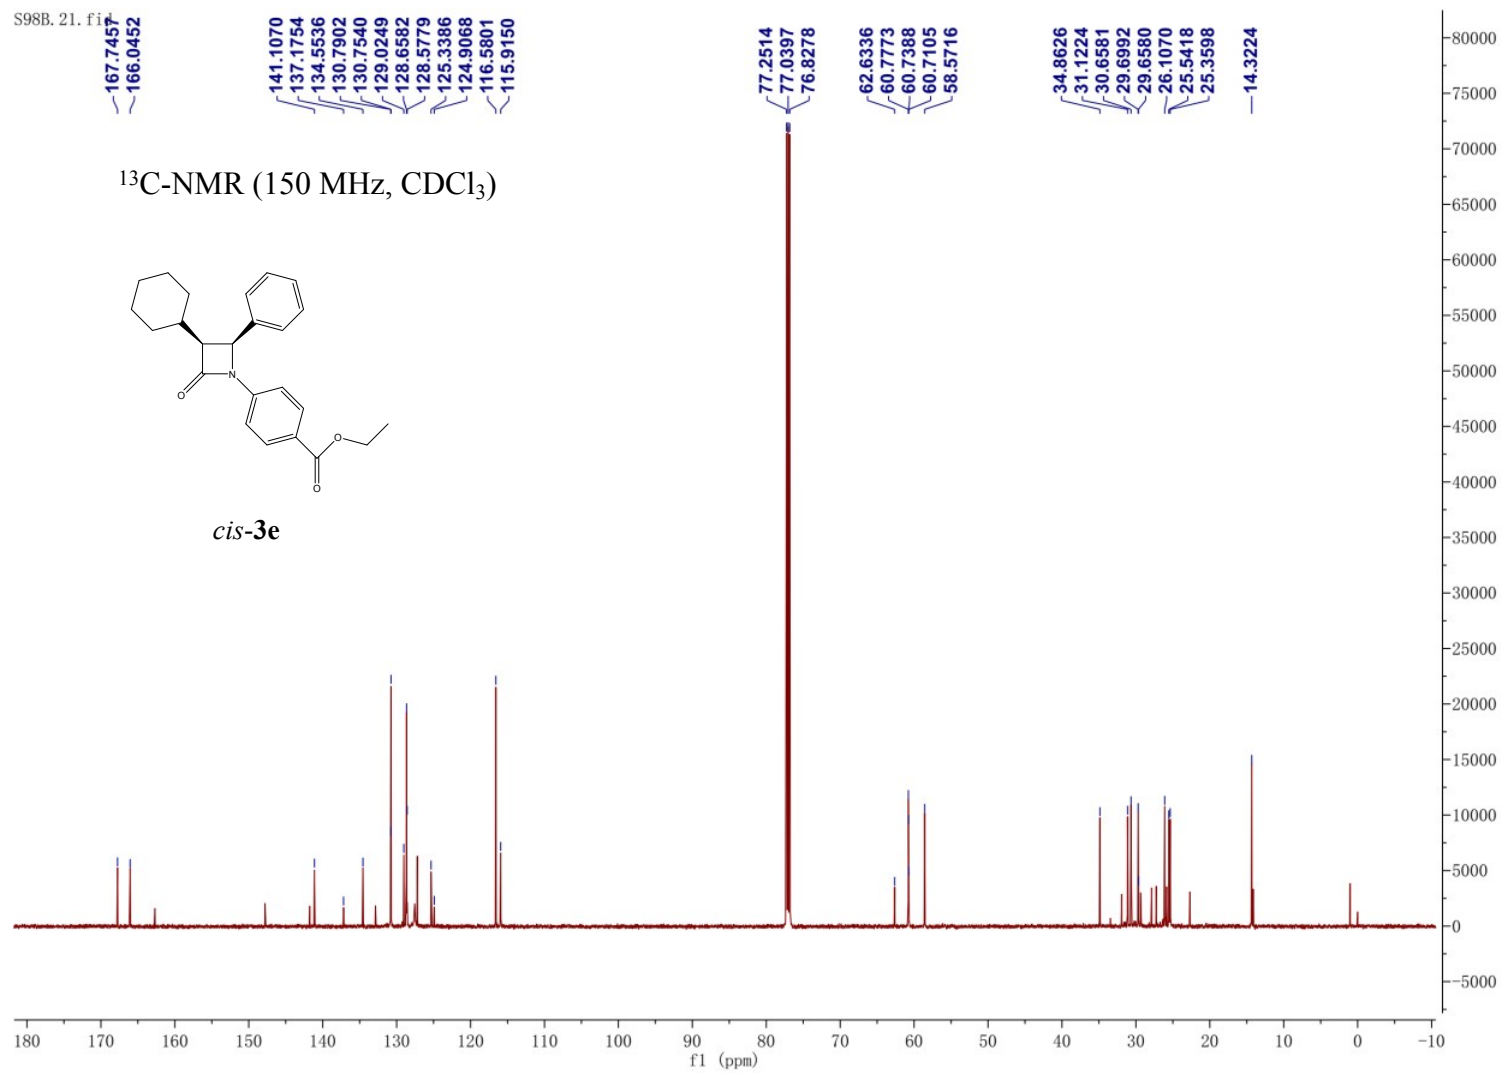

XCL-S73Cl. 10. f1

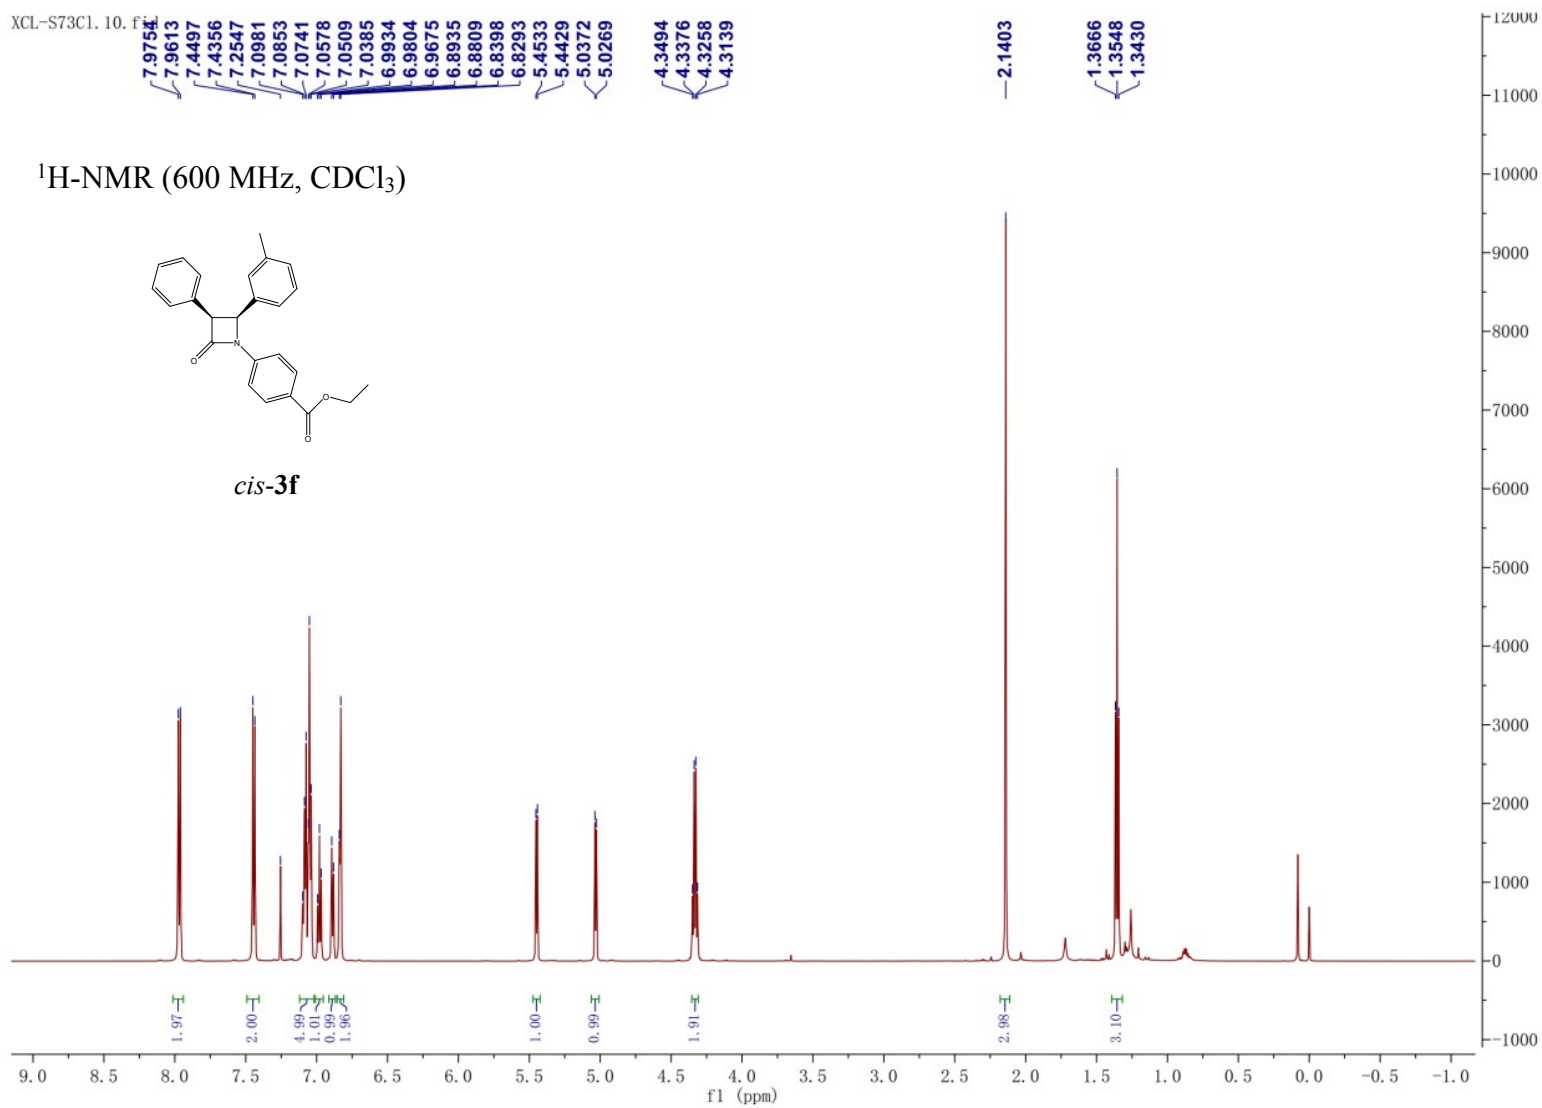

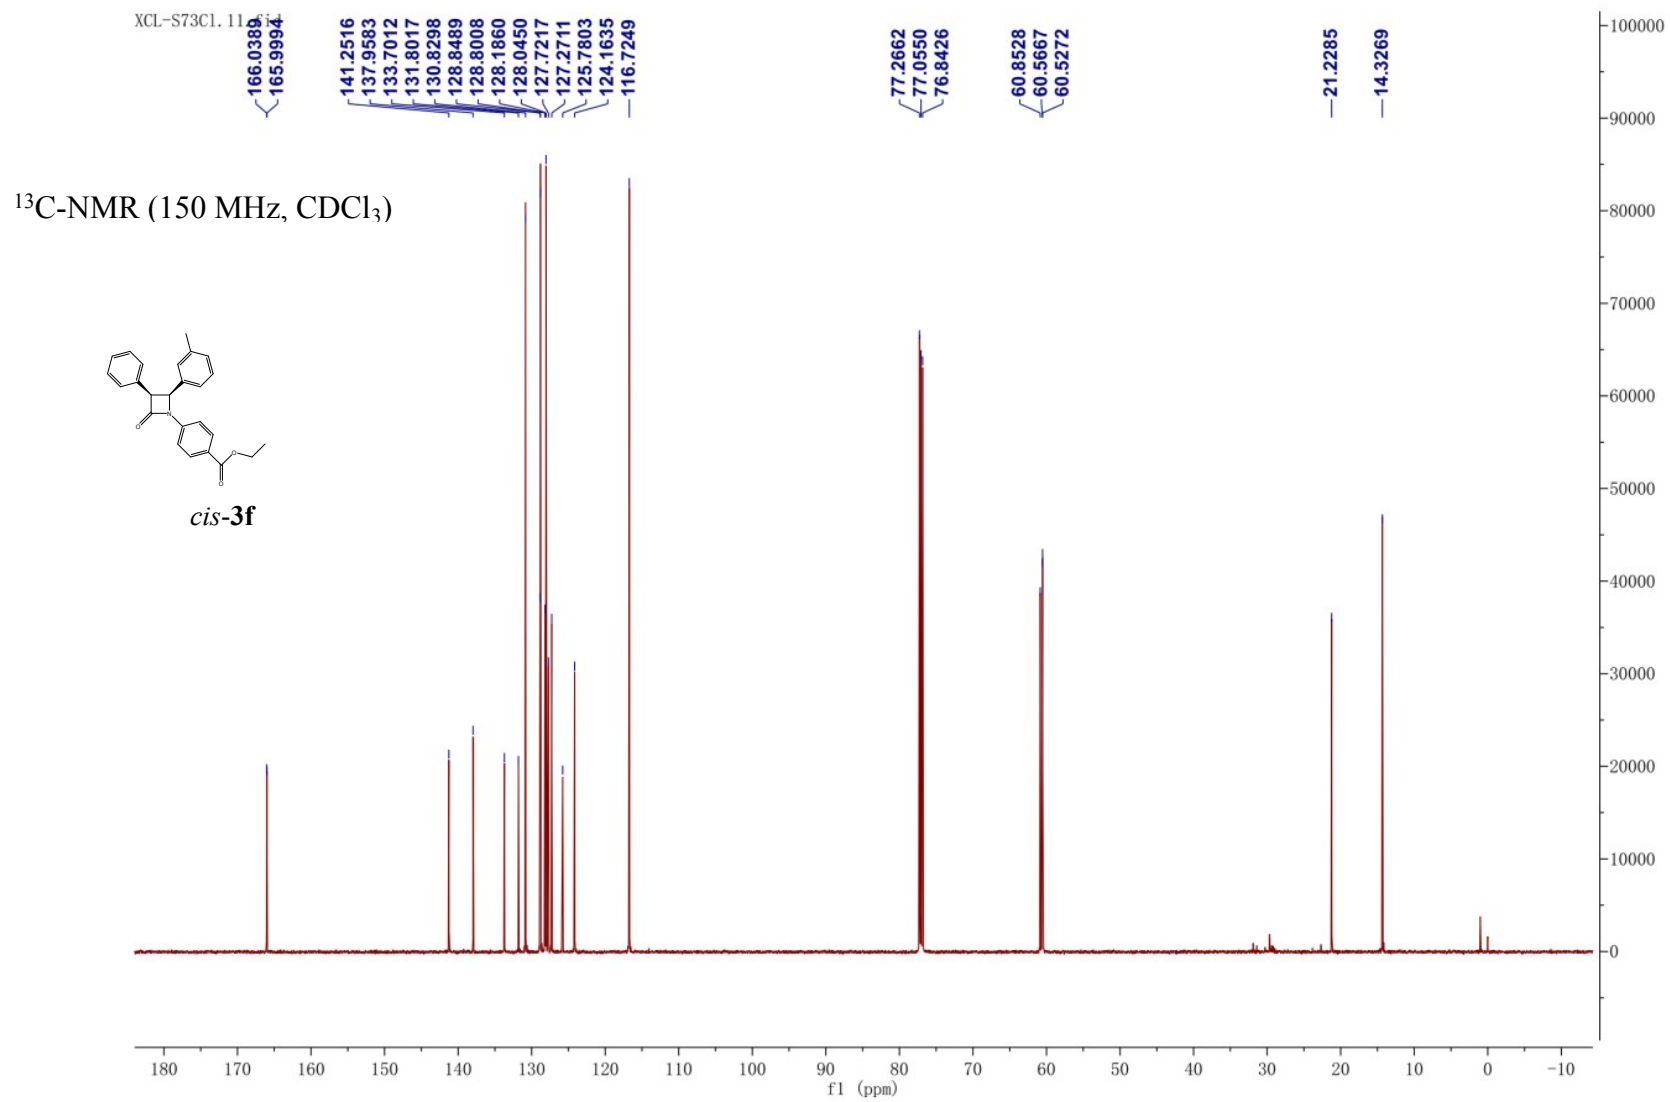

SCL-S84A. 10. fid

7.9674  
7.9529  
7.4353  
7.4209  
7.2545  
7.1088  
7.0962  
7.0847  
7.0687  
7.0612  
7.0487  
6.9340  
6.9201  
6.9127  
6.8984  
5.4685  
5.4581  
5.0314  
5.0210  
4.3490  
4.3460  
4.3371  
4.3342  
4.3252  
4.3223  
4.3133  
4.3105

$^1\text{H-NMR}$  (600 MHz,  $\text{CDCl}_3$ )

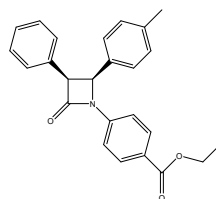

*cis-3g*

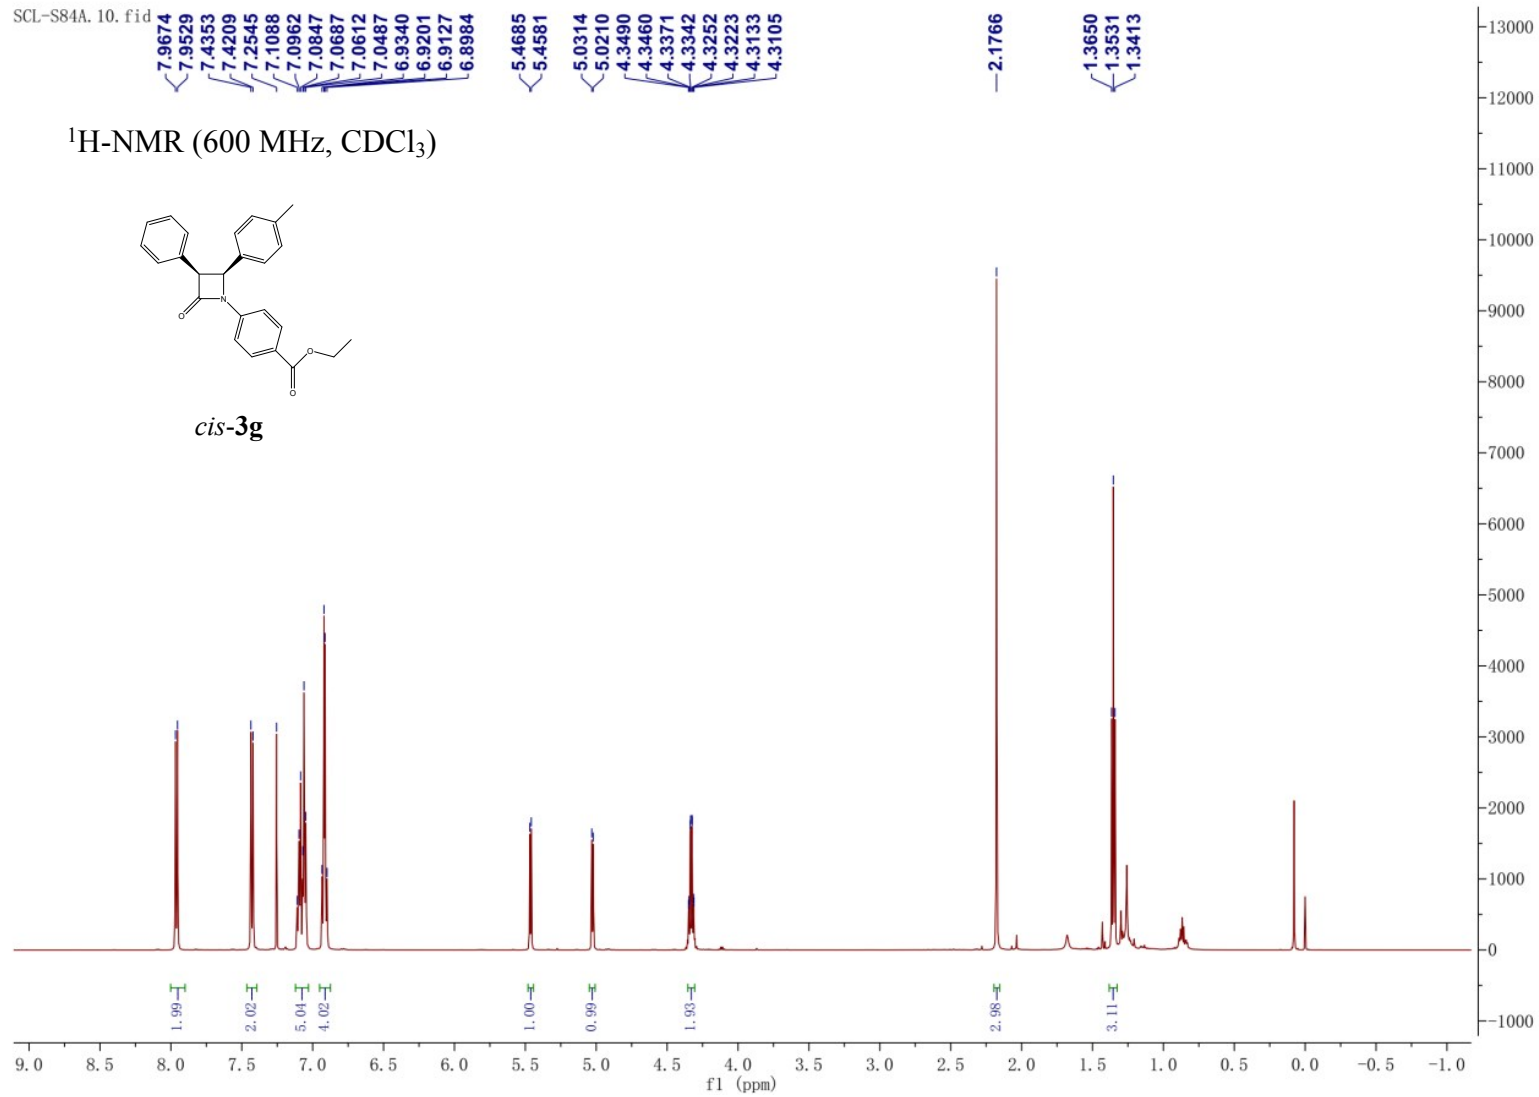

S84A. 10. fid

$^{13}\text{C}$ -NMR (150 MHz,  $\text{CDCl}_3$ )

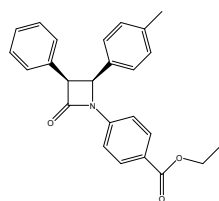

*cis*-**3g**

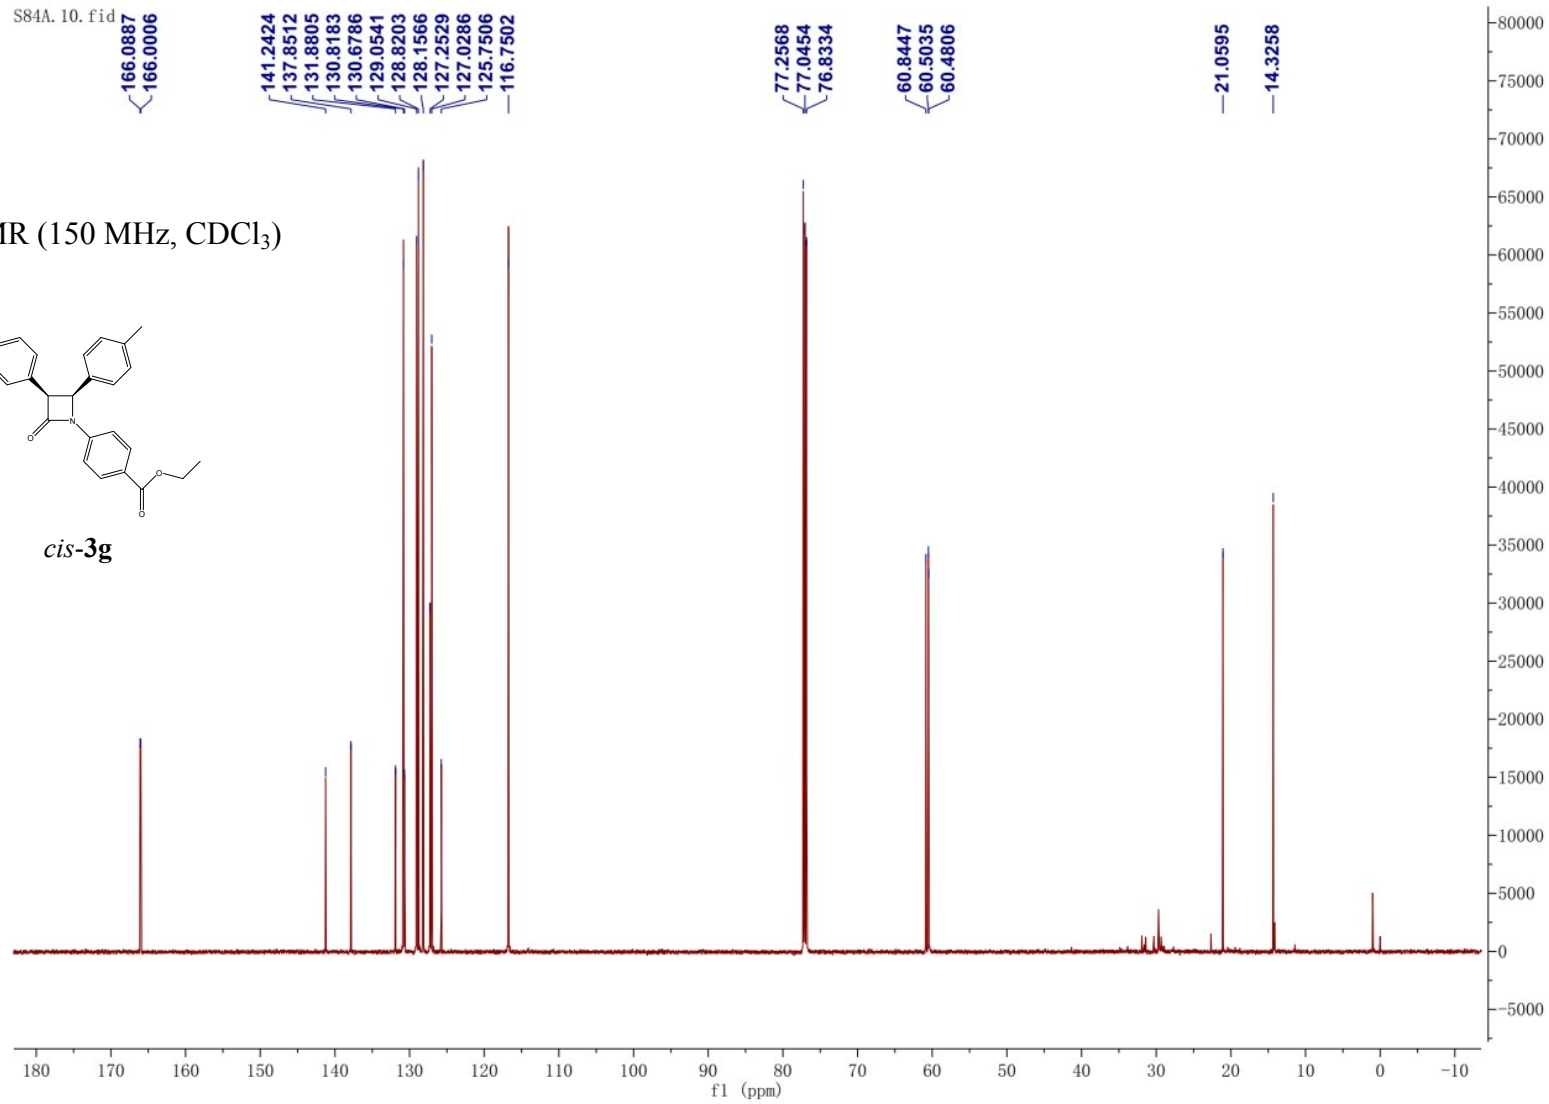

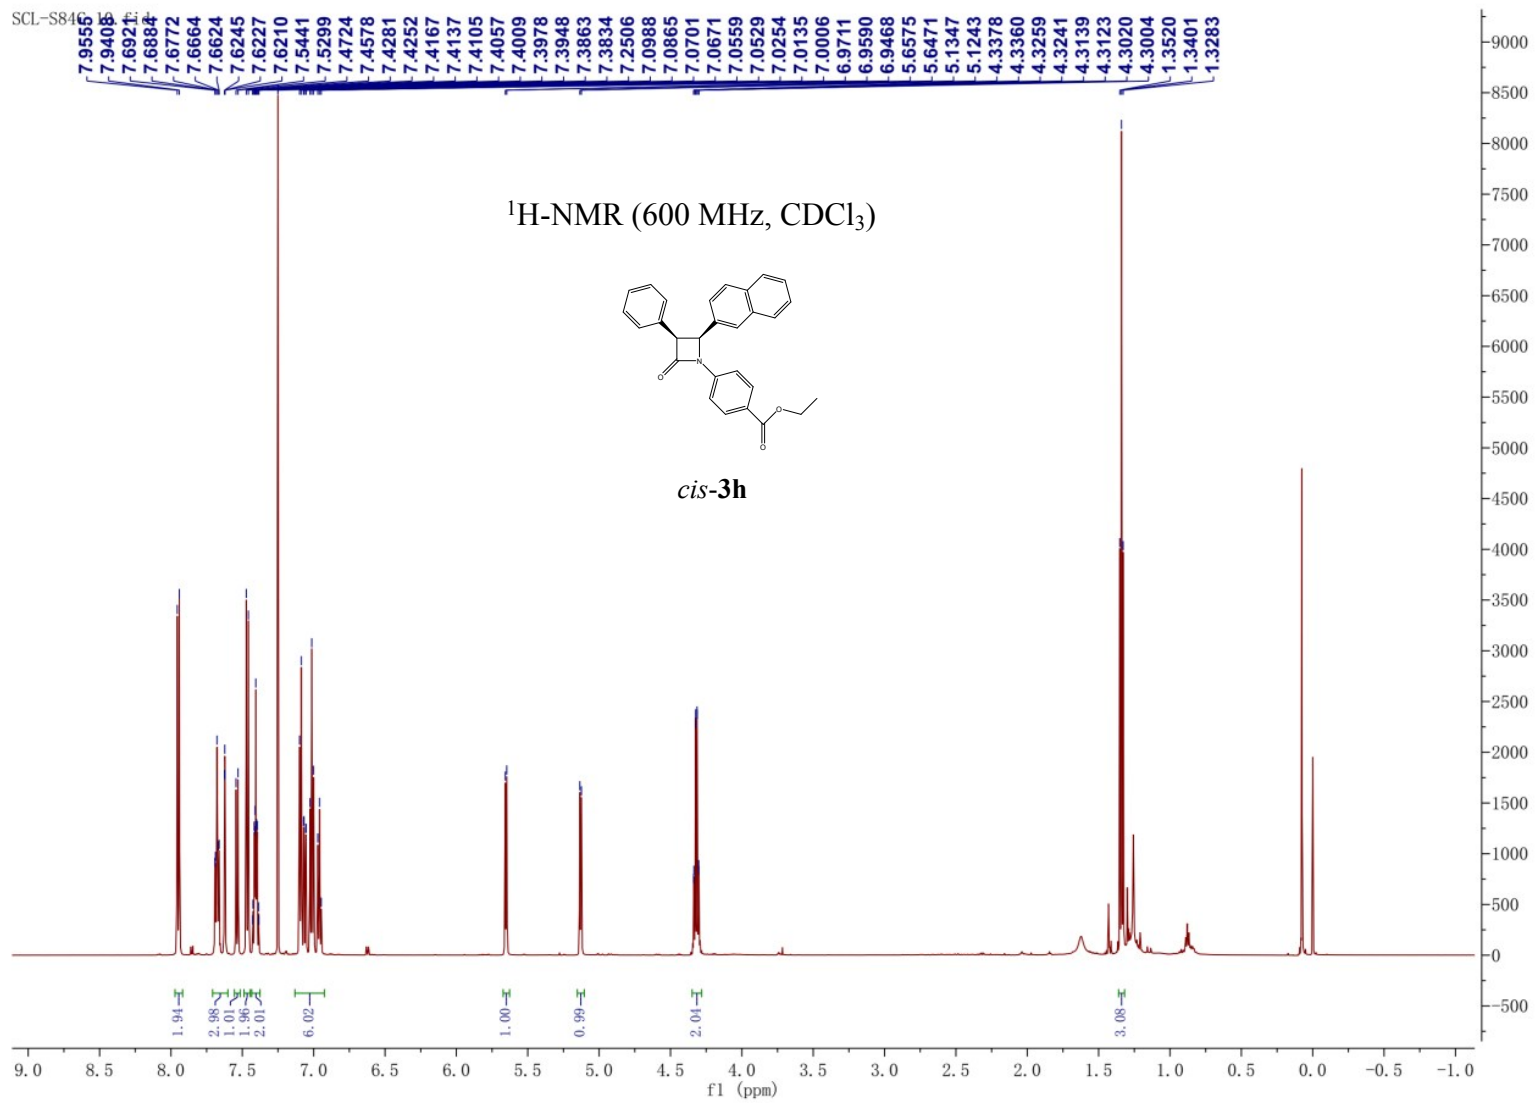

S84C.10.fid

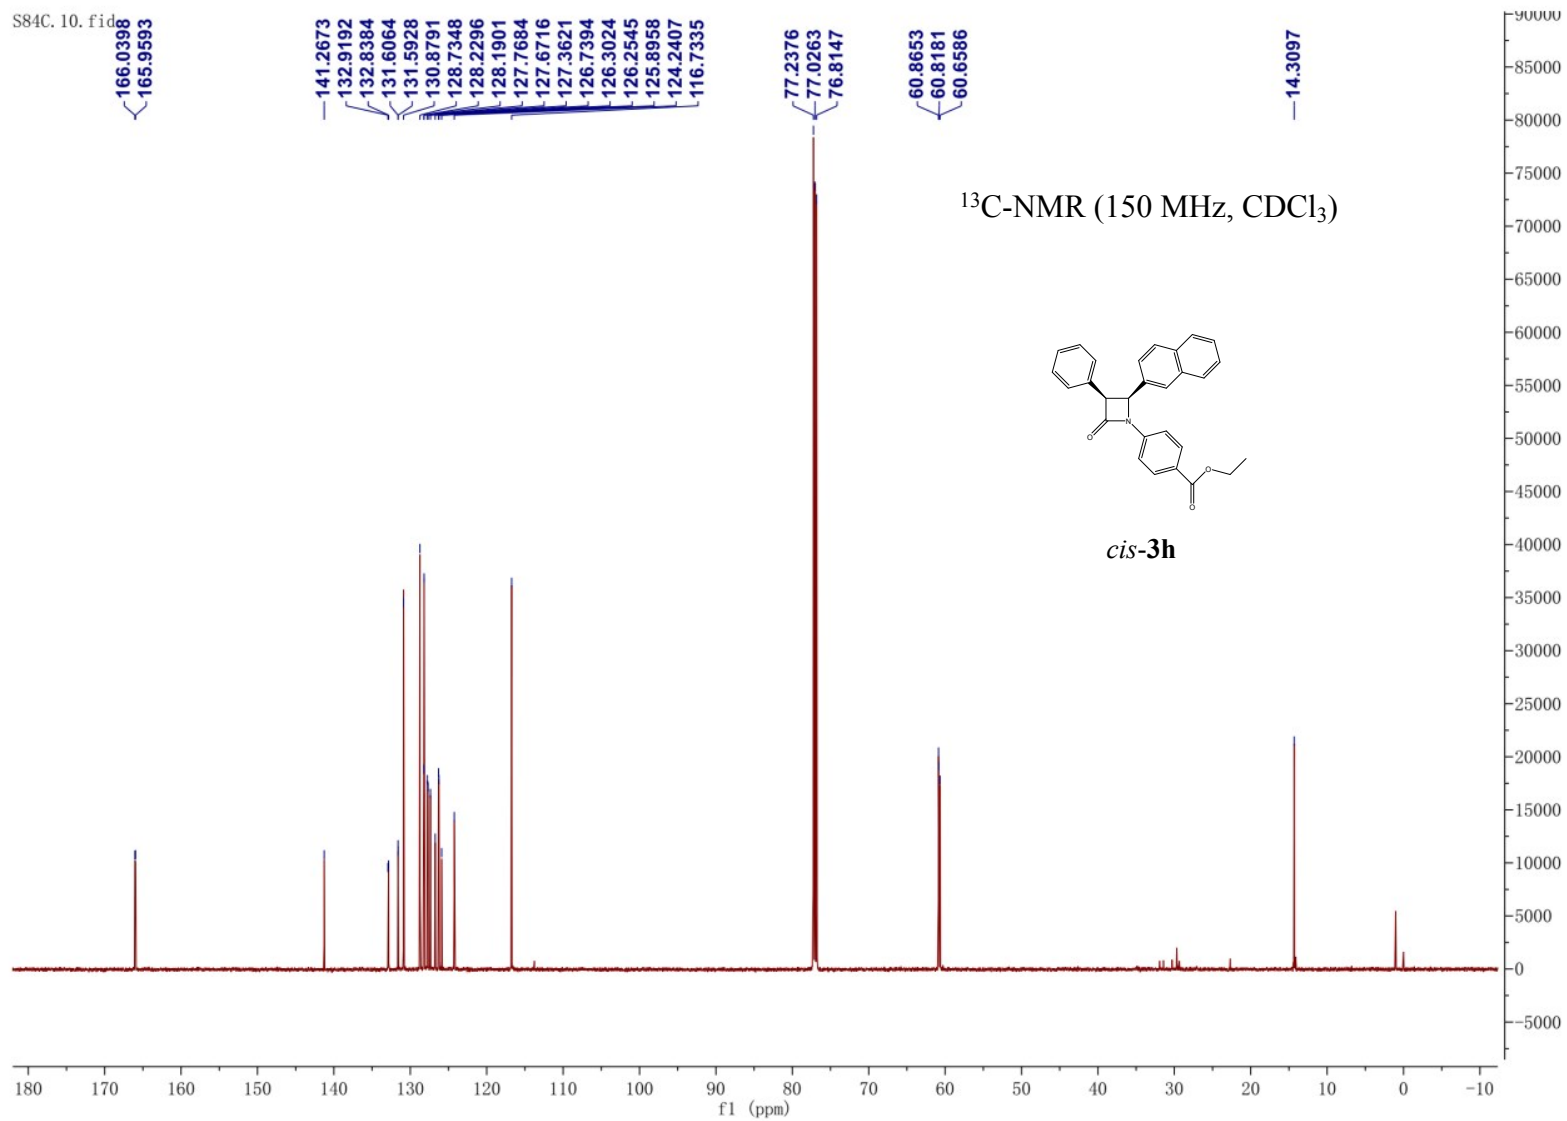

1209S89-C. 10. fid

<sup>1</sup>H-NMR (600 MHz, CDCl<sub>3</sub>)

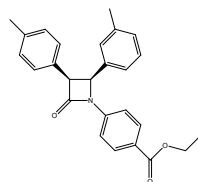

*cis-3i*

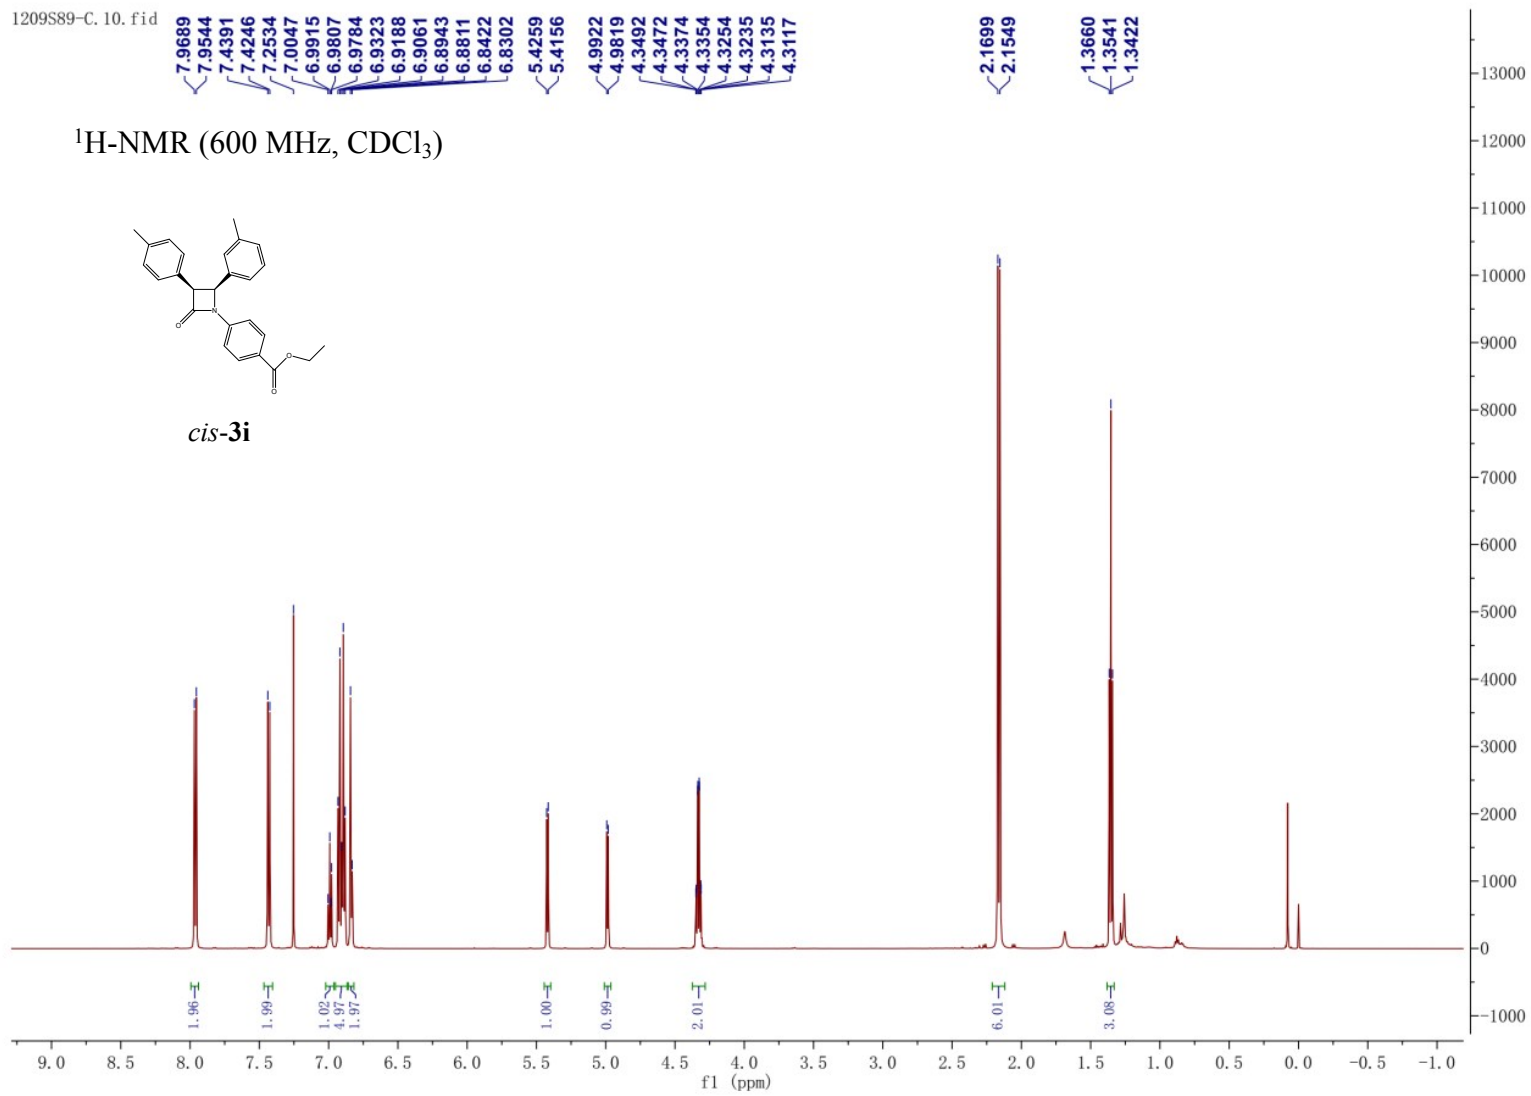



1211S89-C...  
166.3694  
166.0231

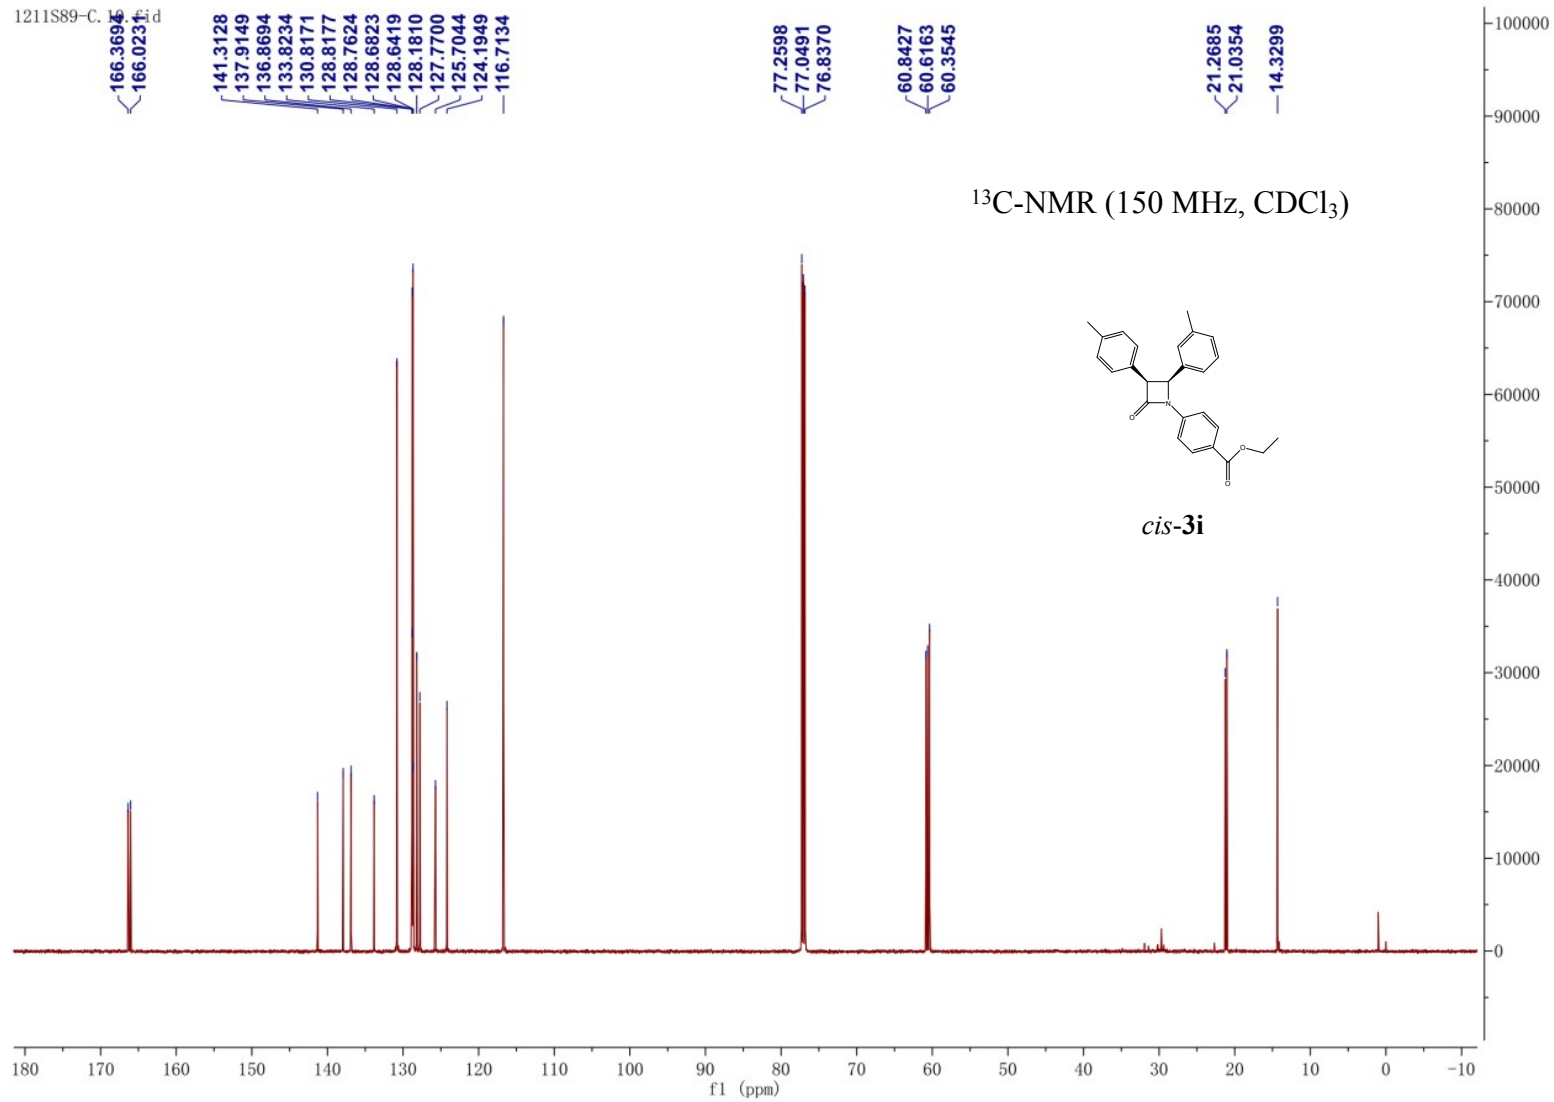

1209S89-D. 10. f1

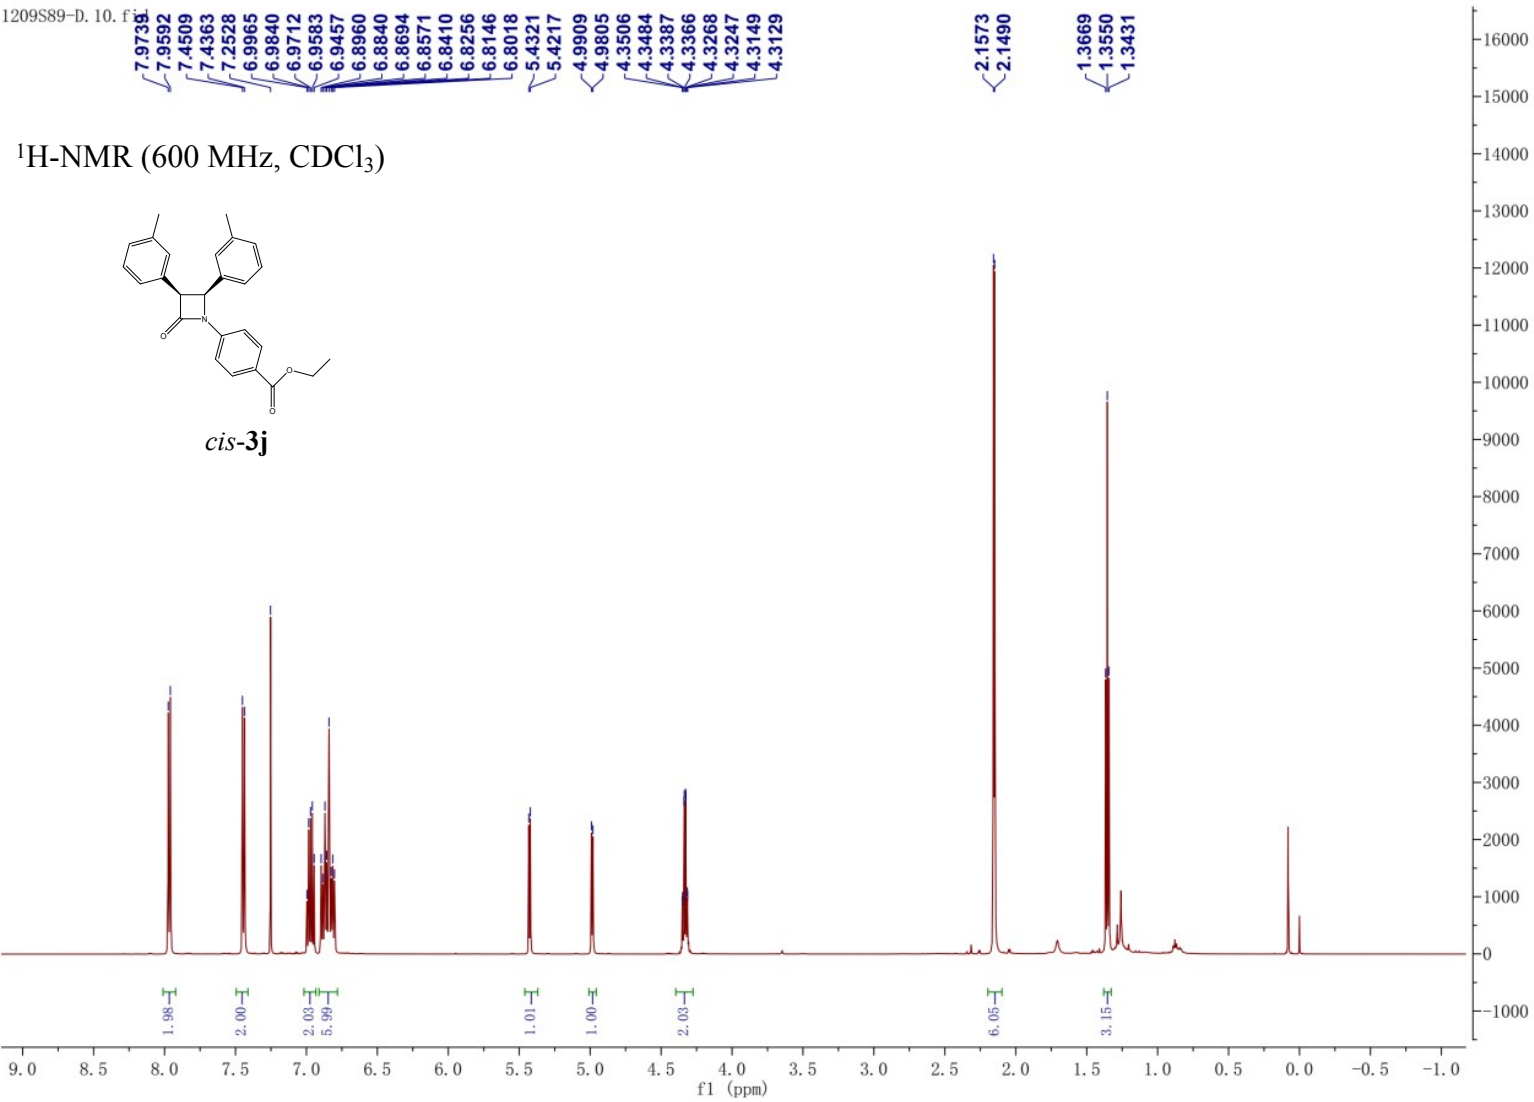

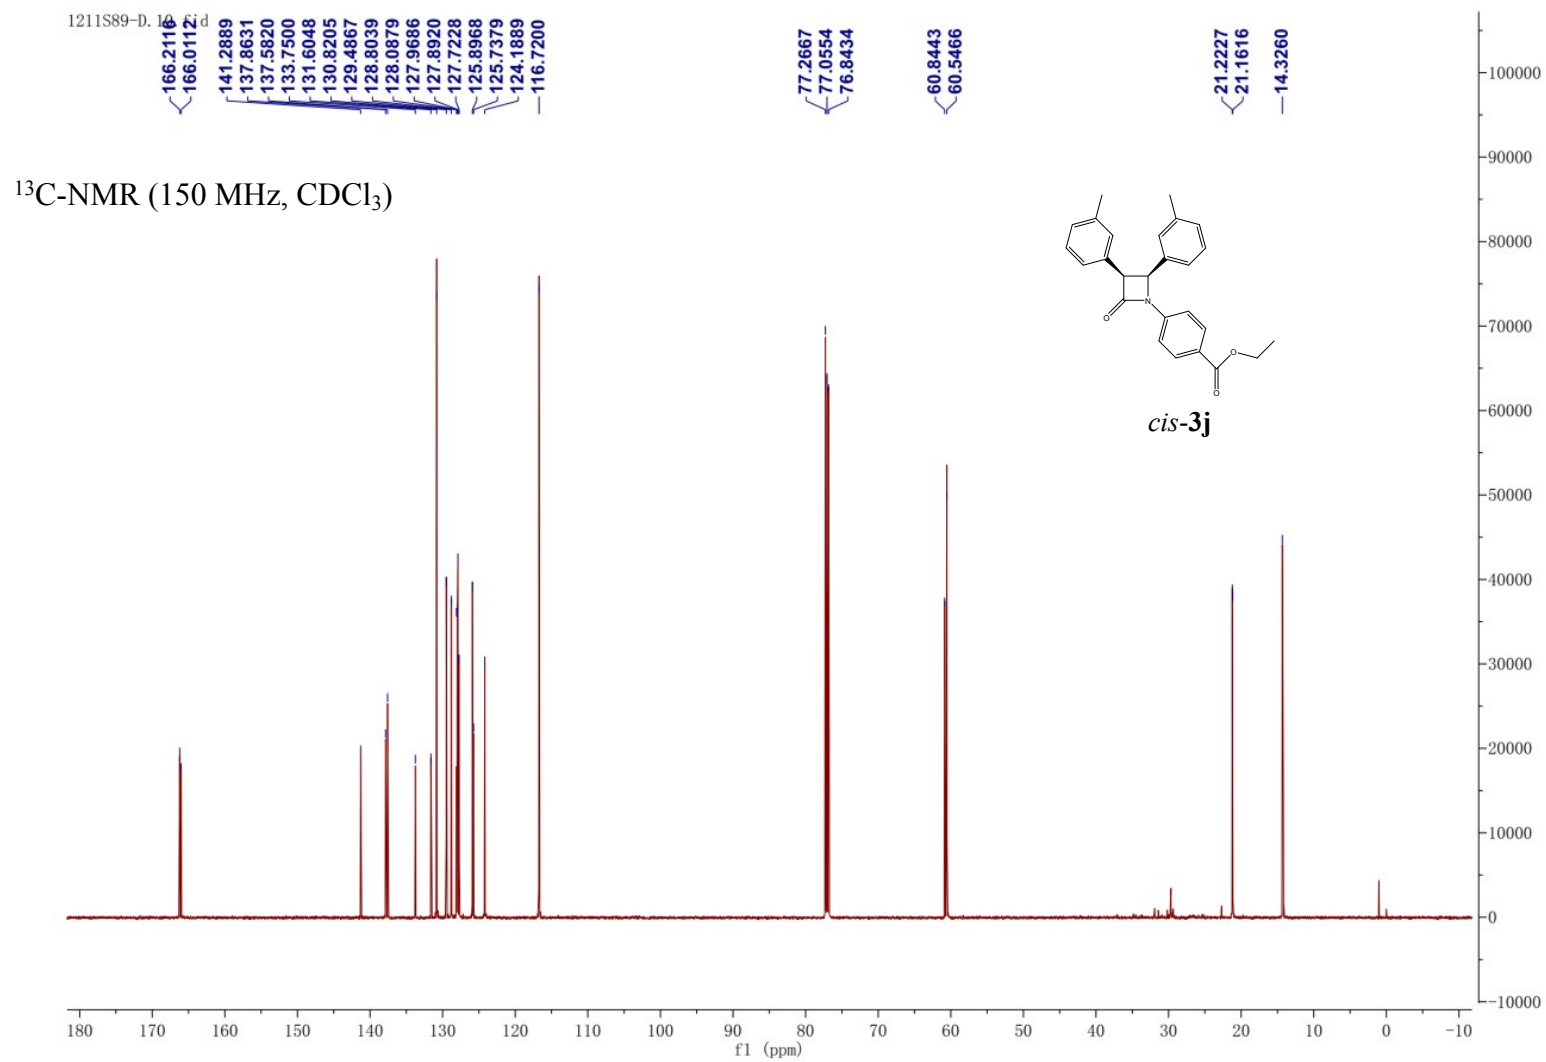

20191216-XCL-S92-0.fid

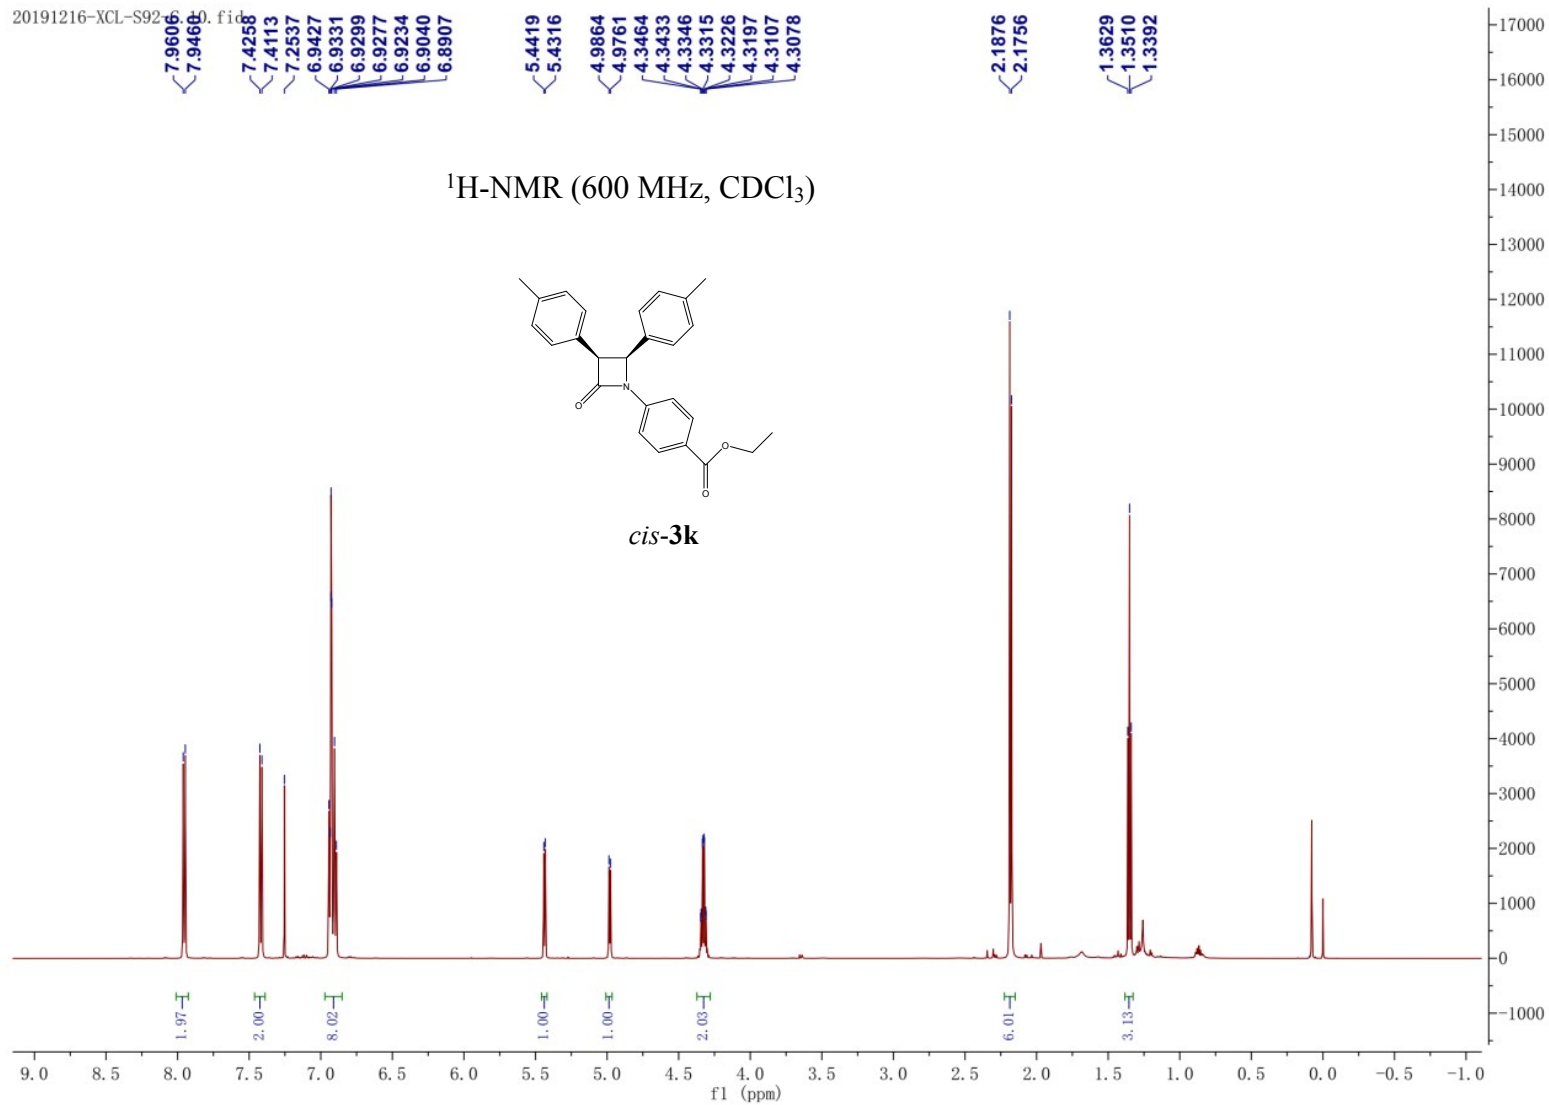

20191216-XE-002-C. 11. fid

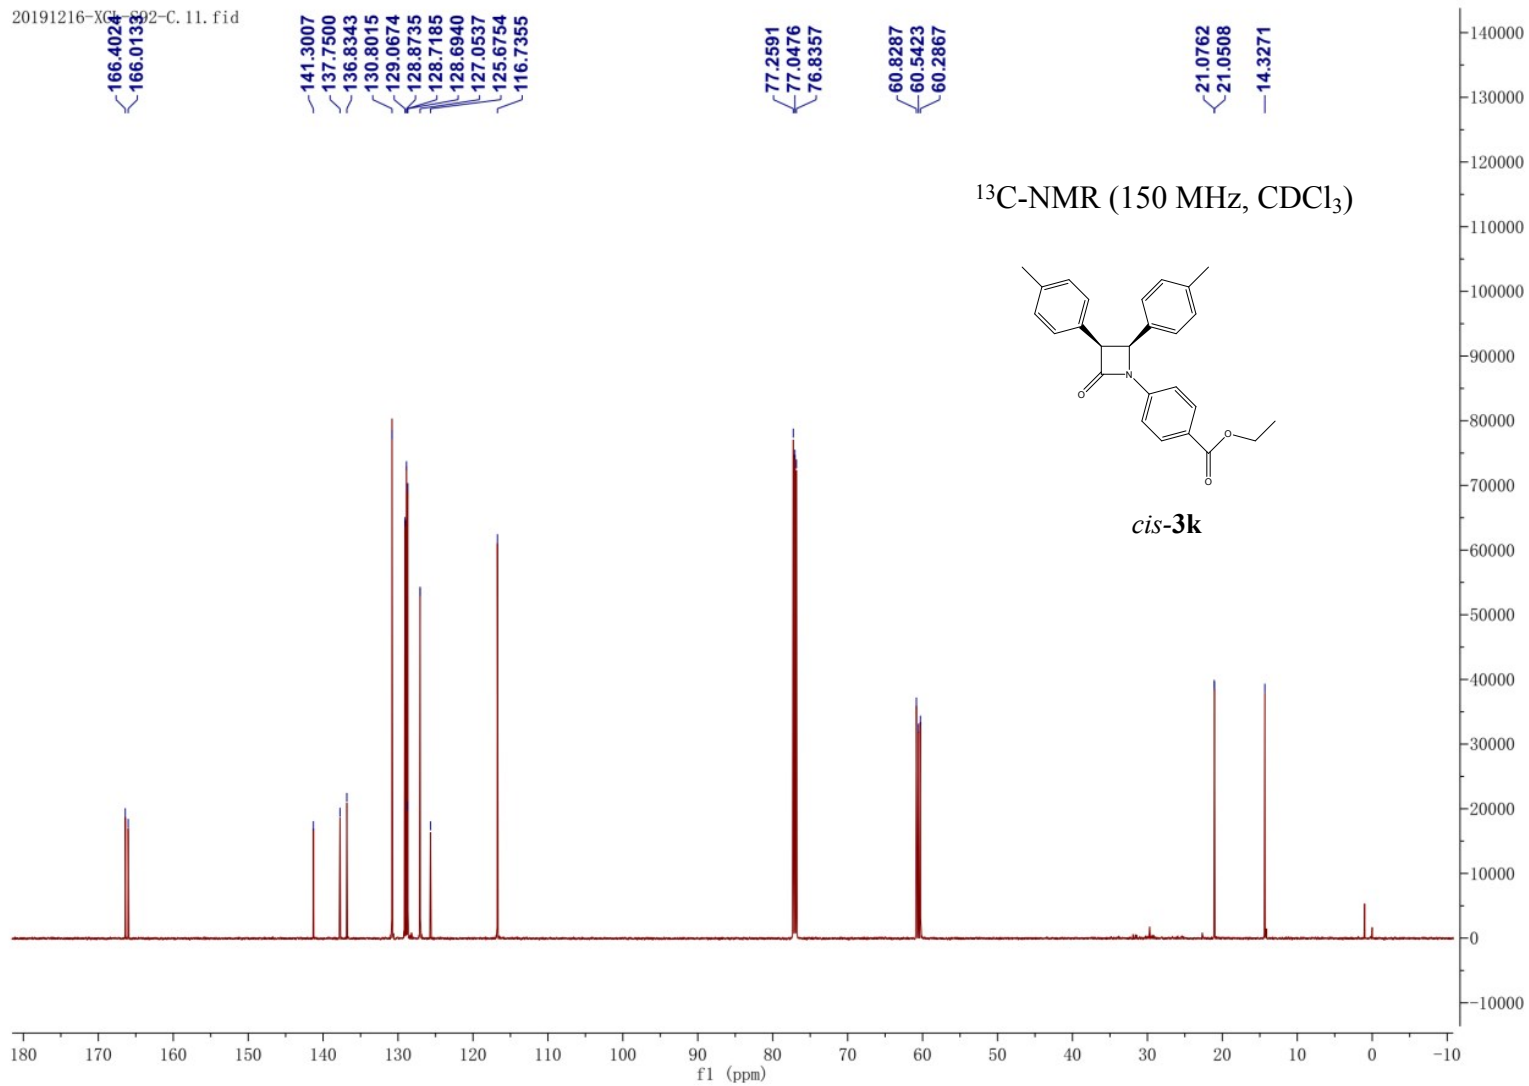

20191216-XCL-S92-1

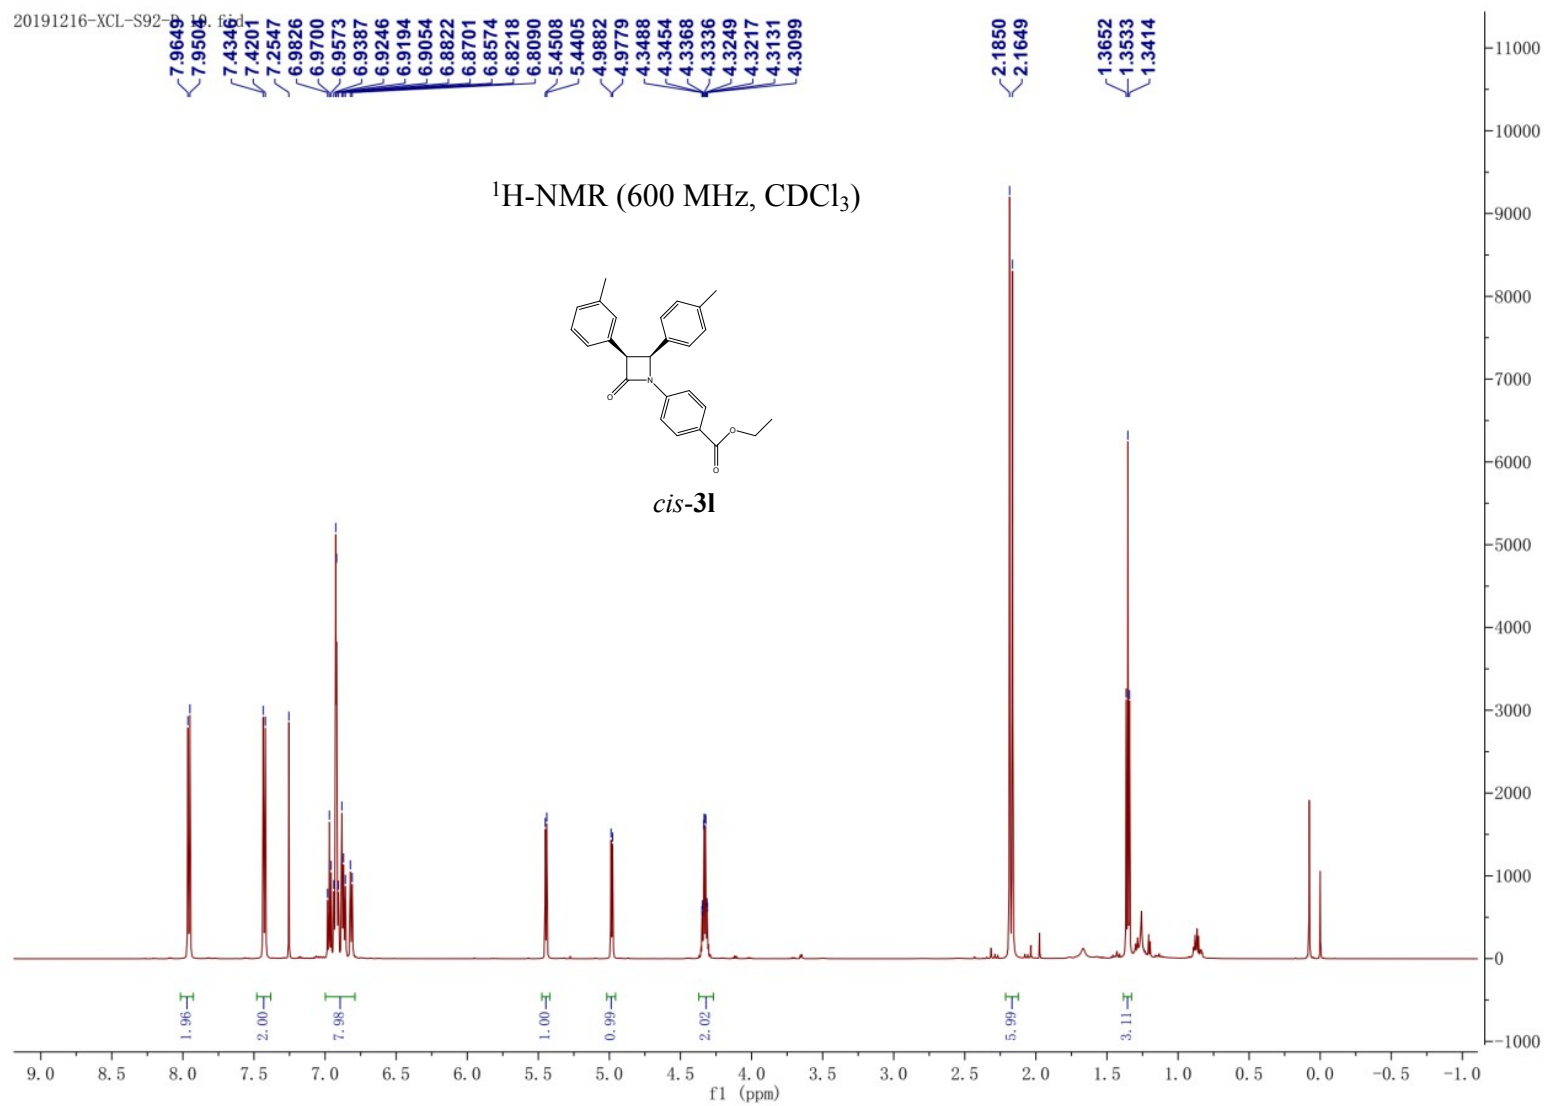

20191216-XCL-892-D. 11.

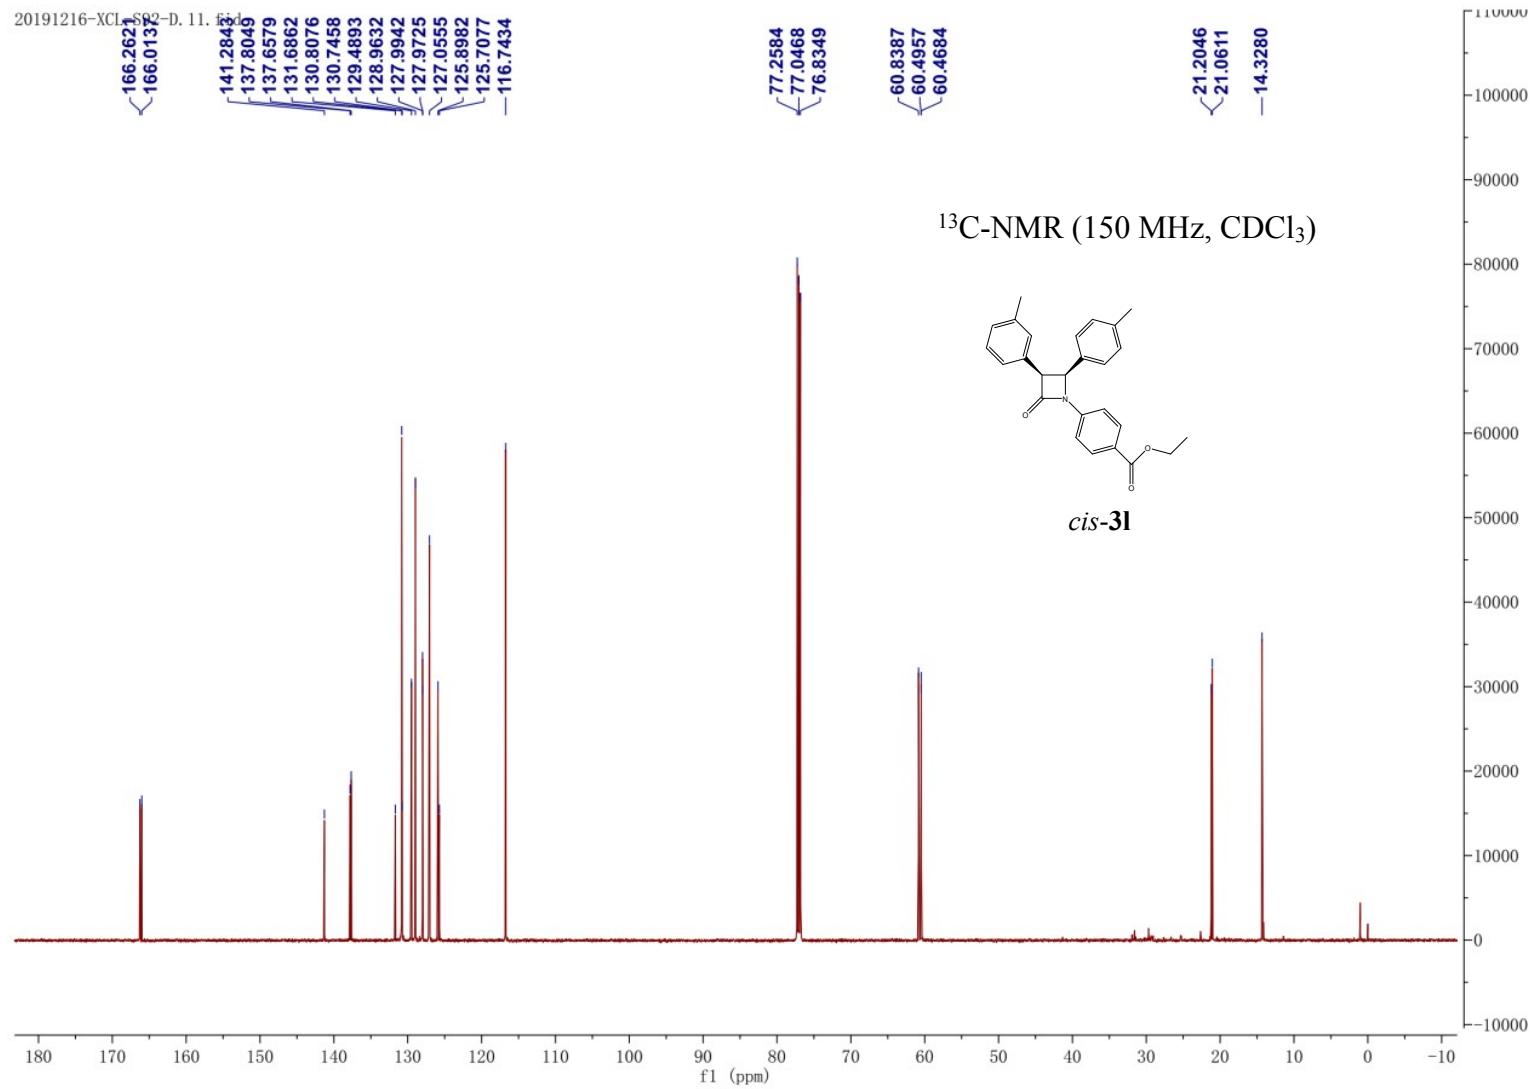

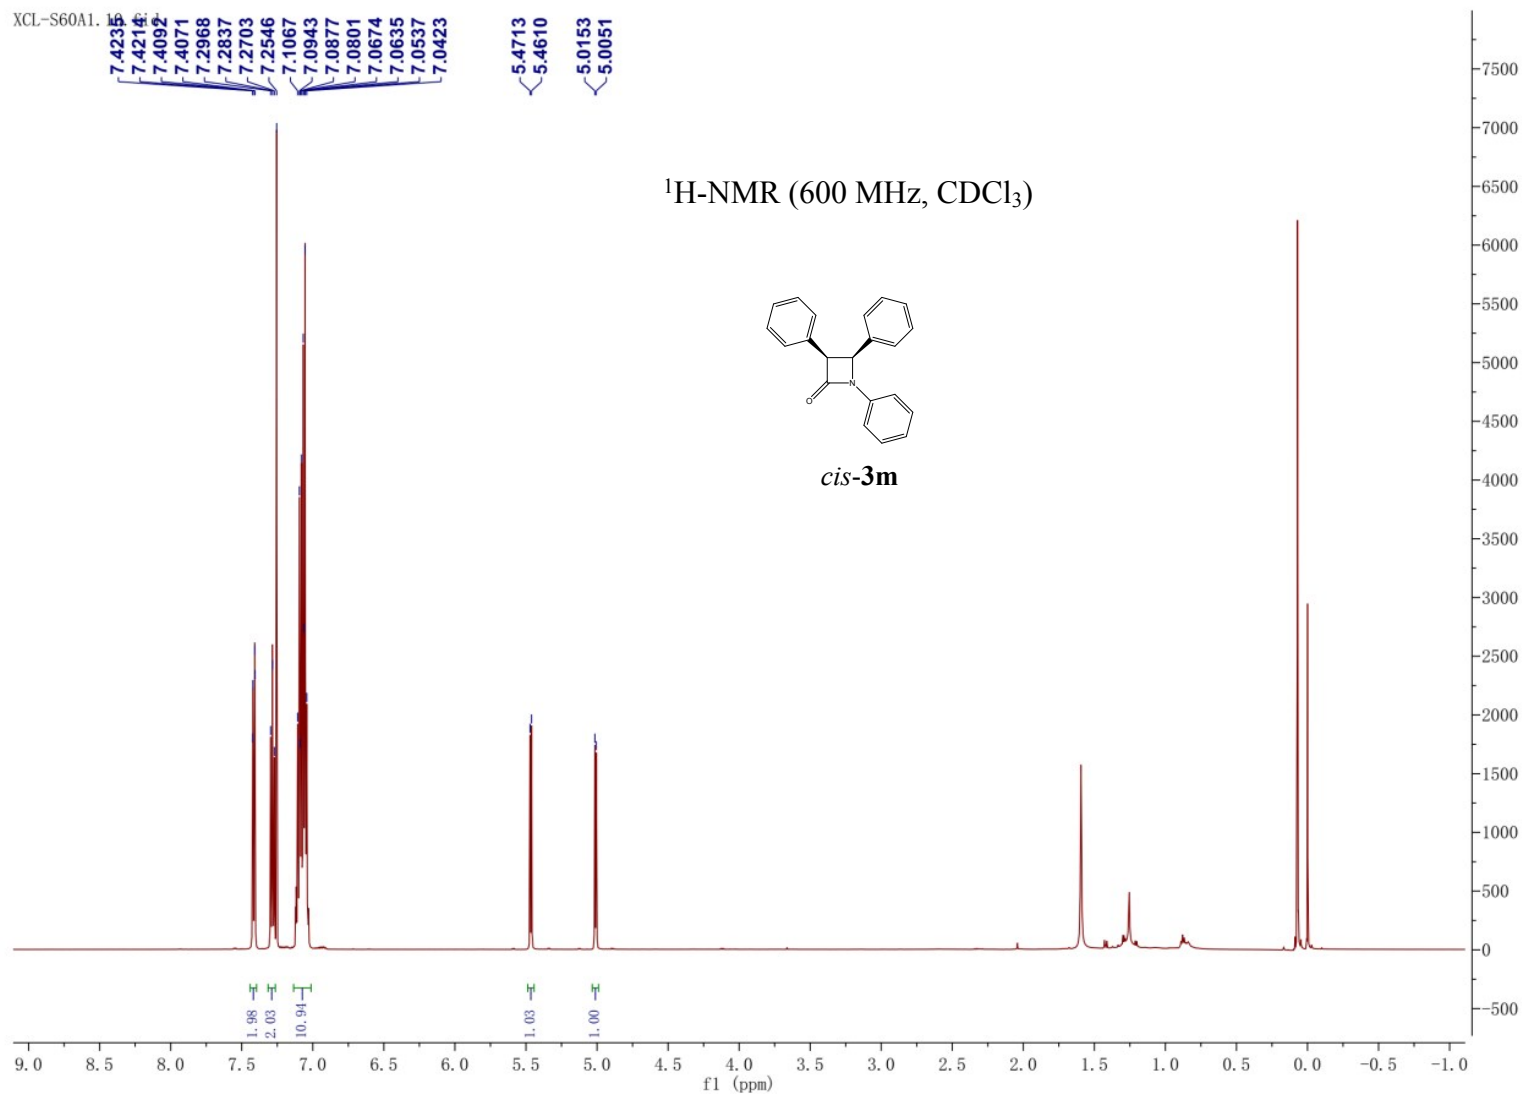



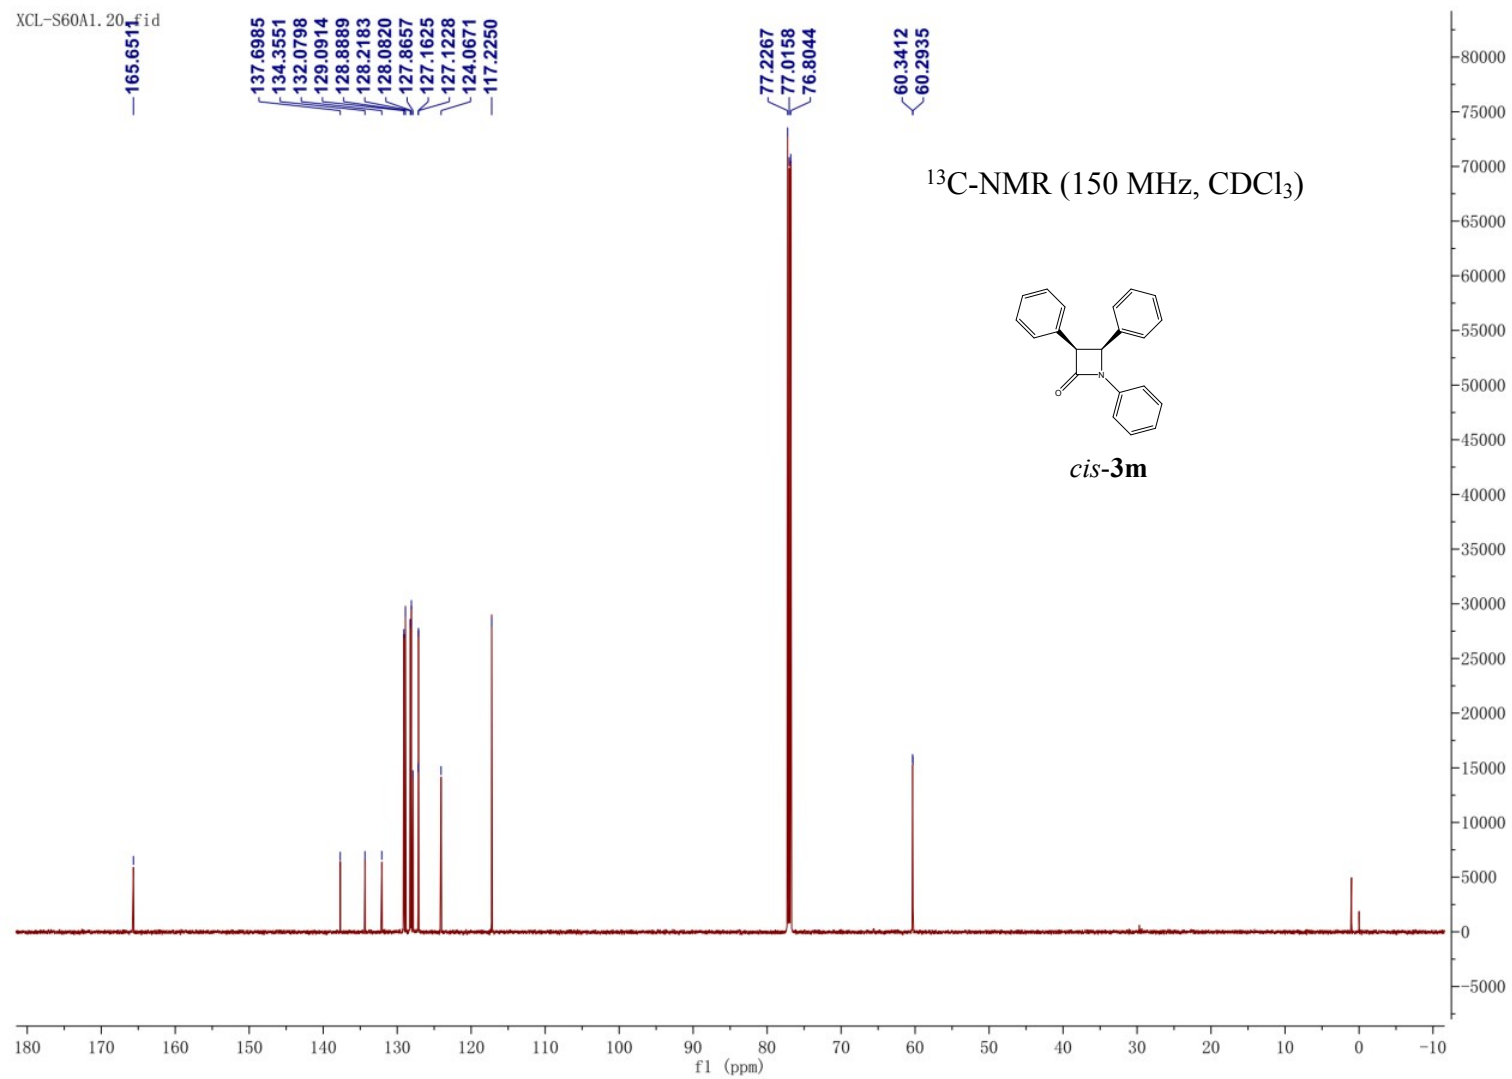

S80A1.10.fid

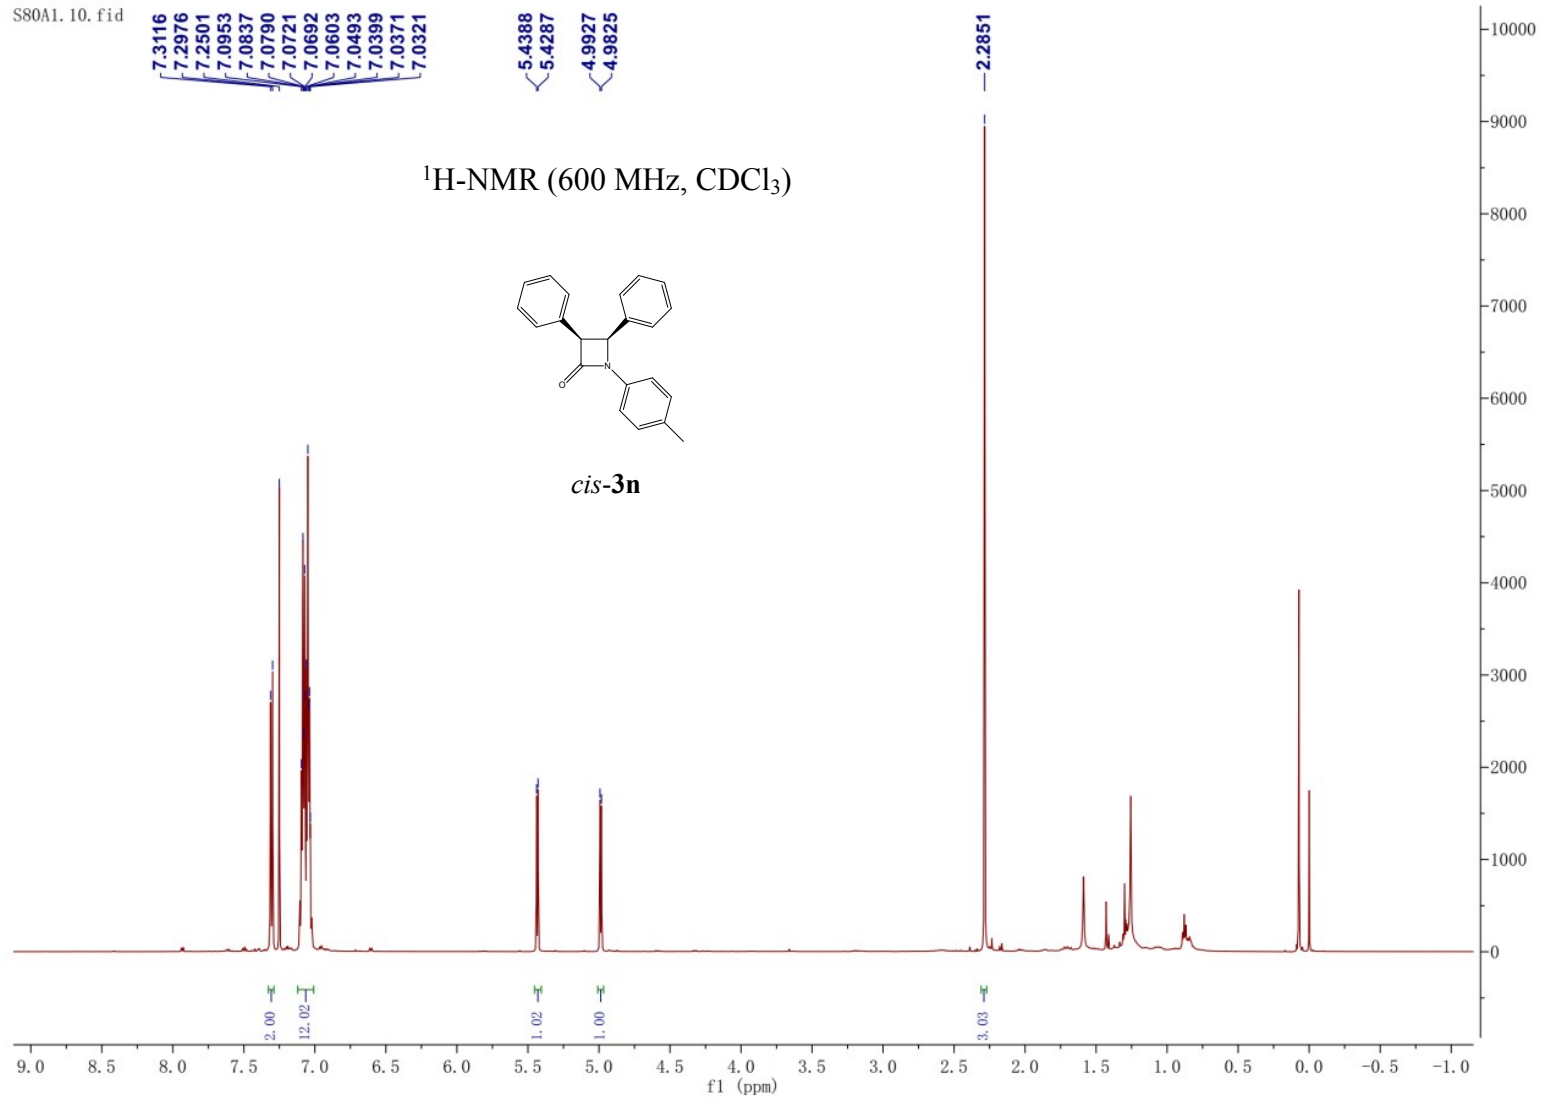

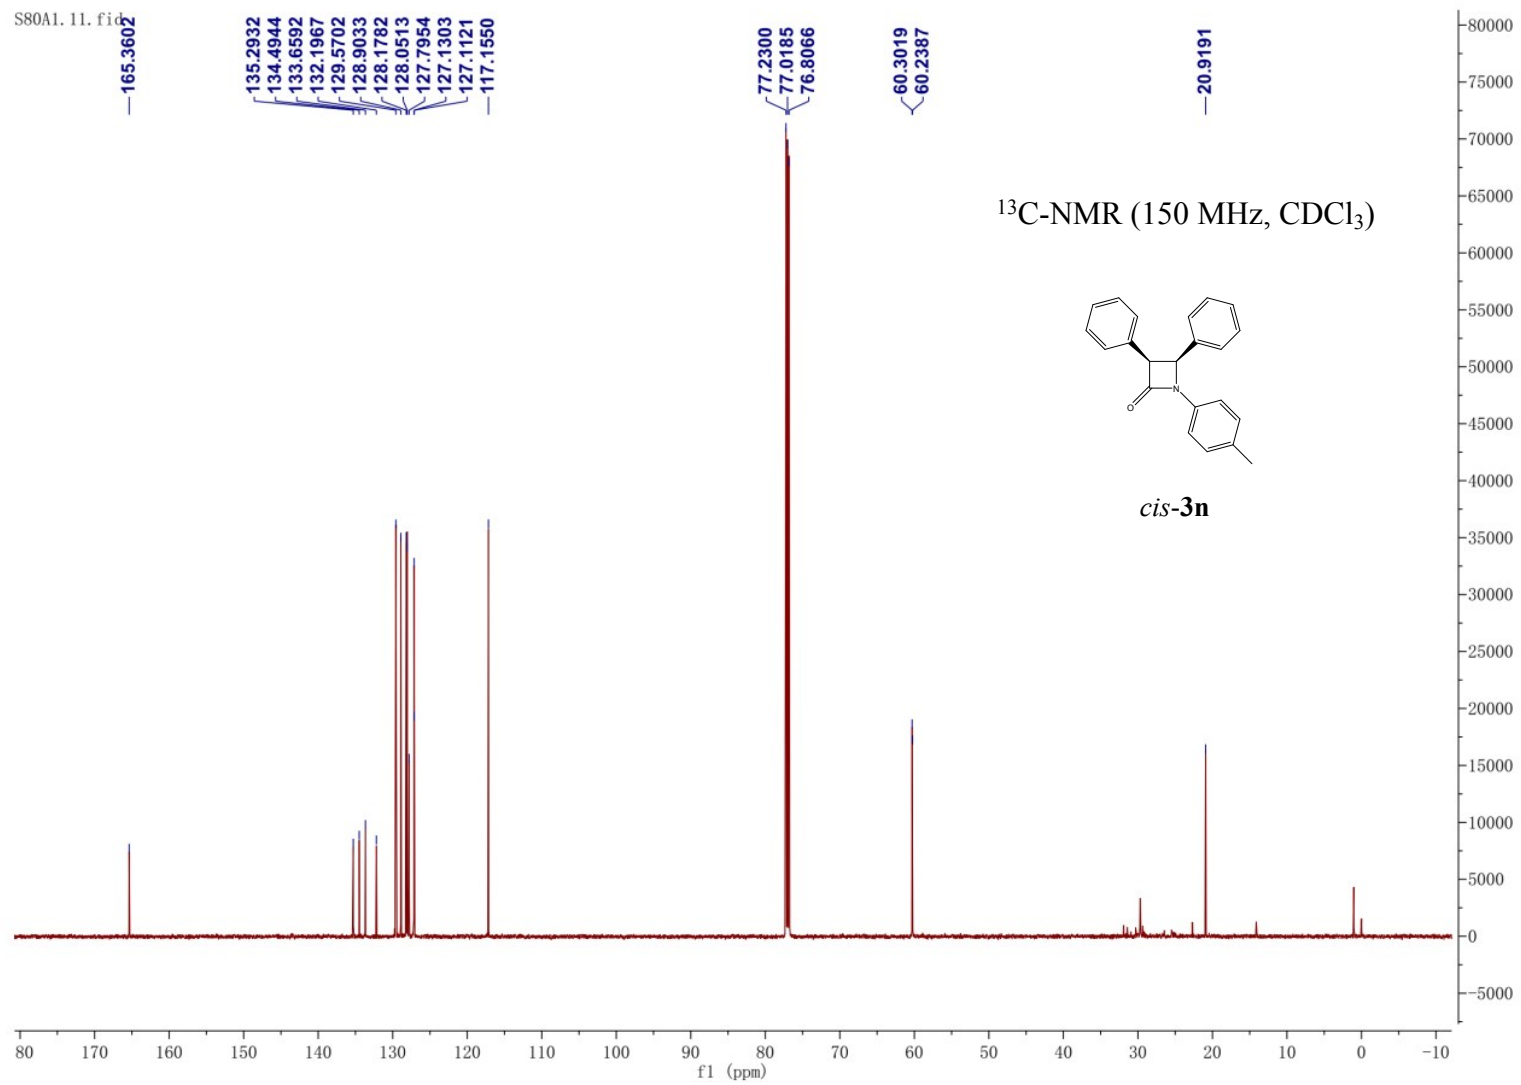

S80B2H. 10. fid

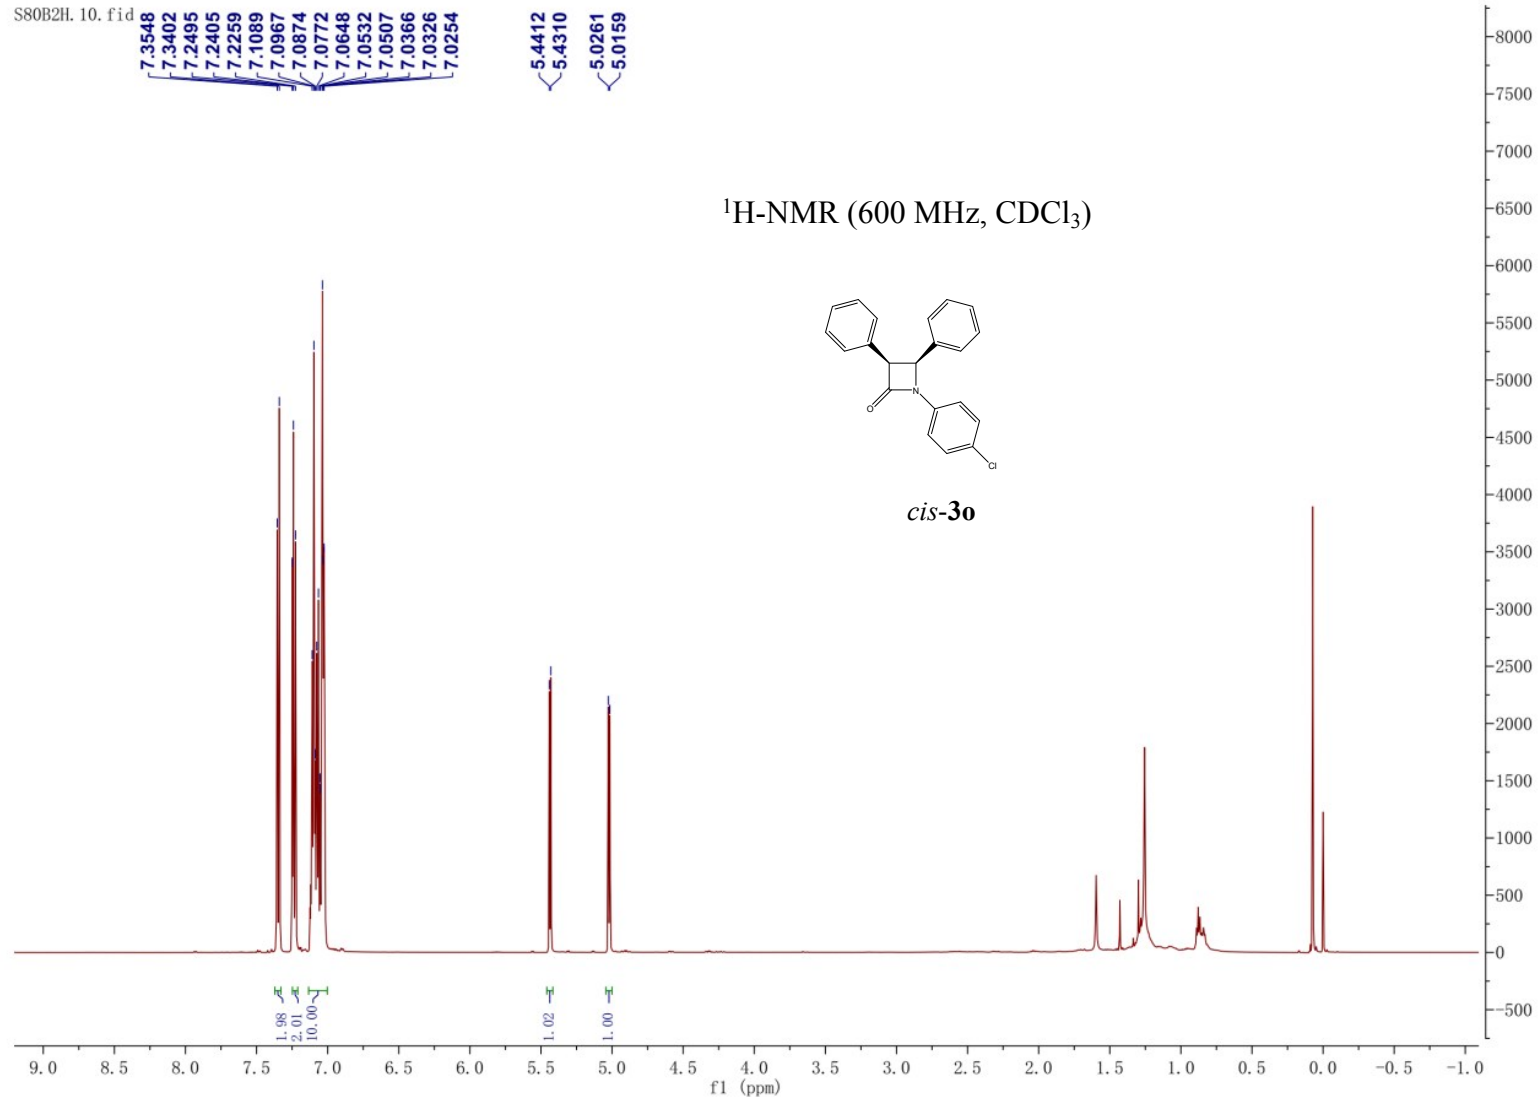

S80B2C. 10. f1

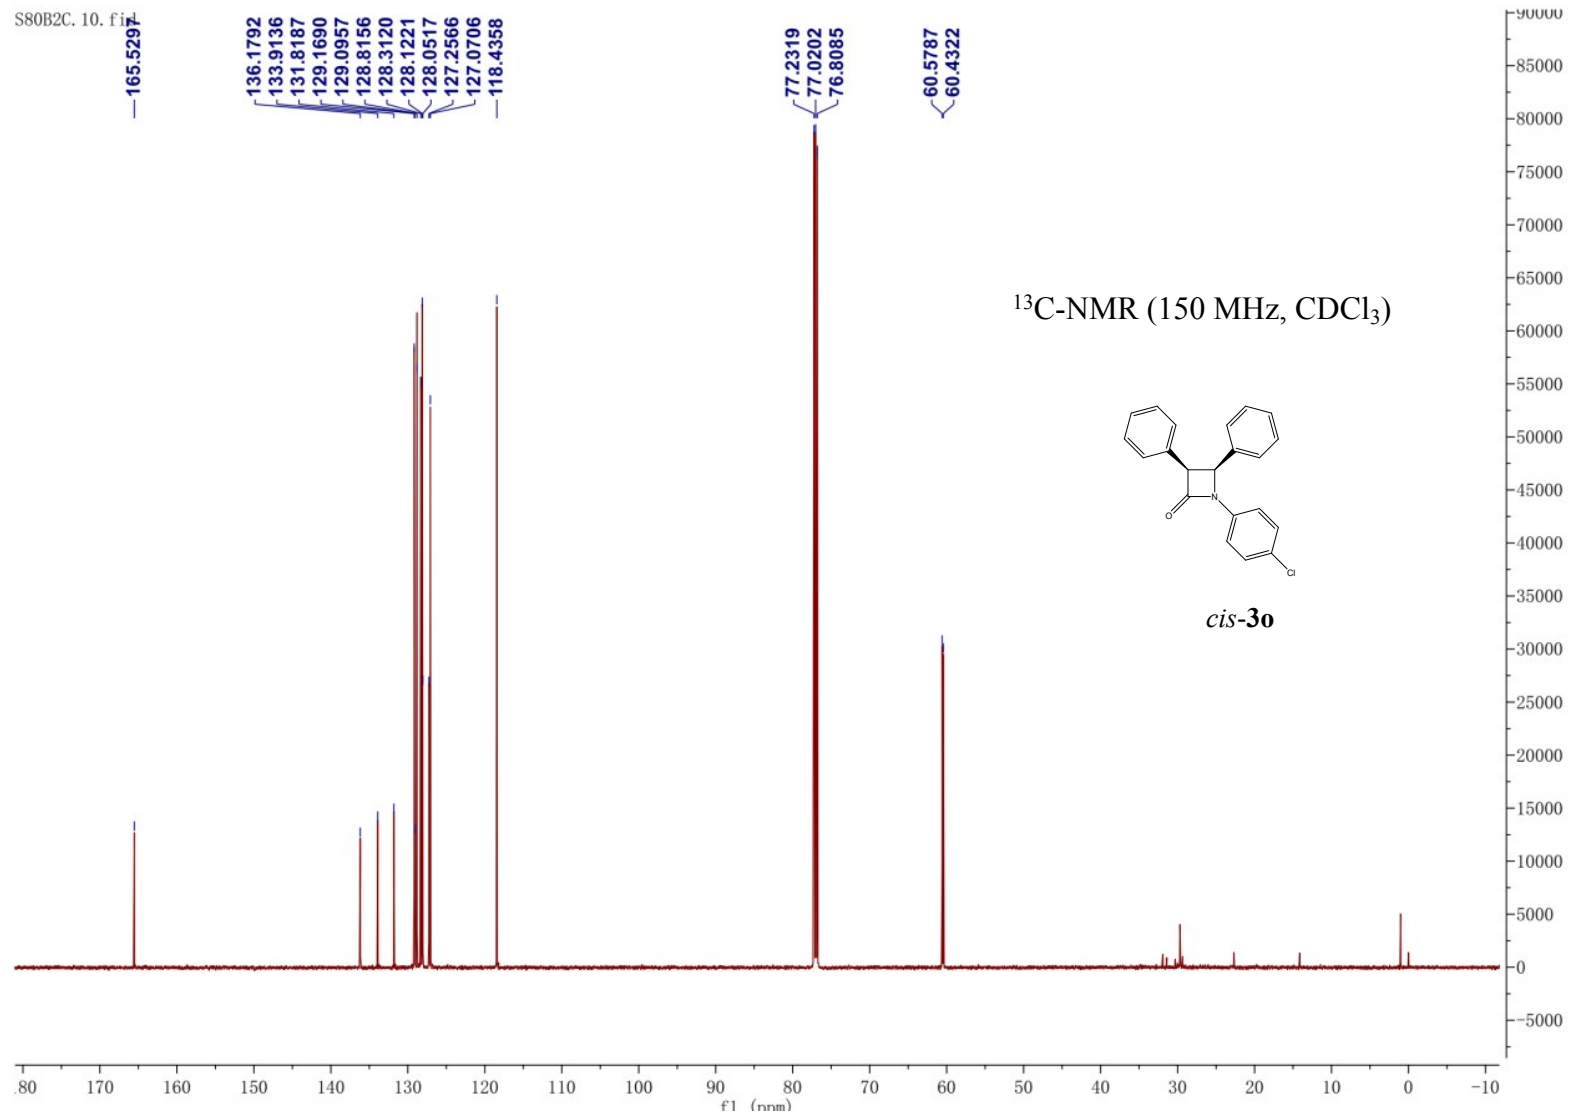

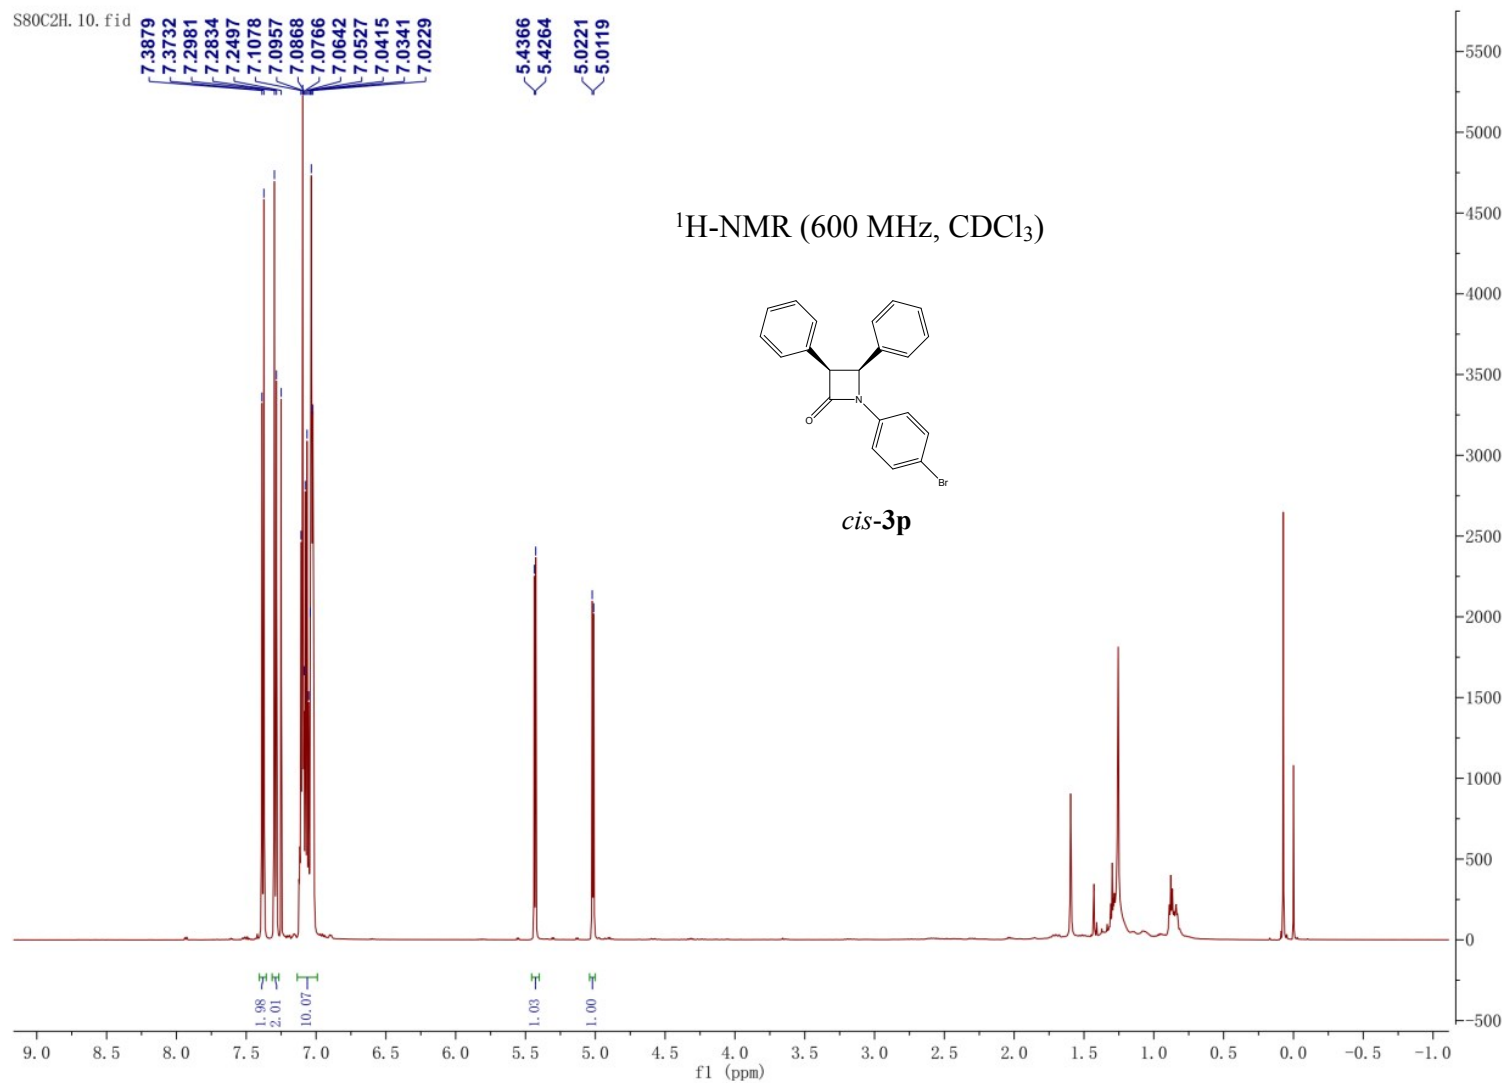

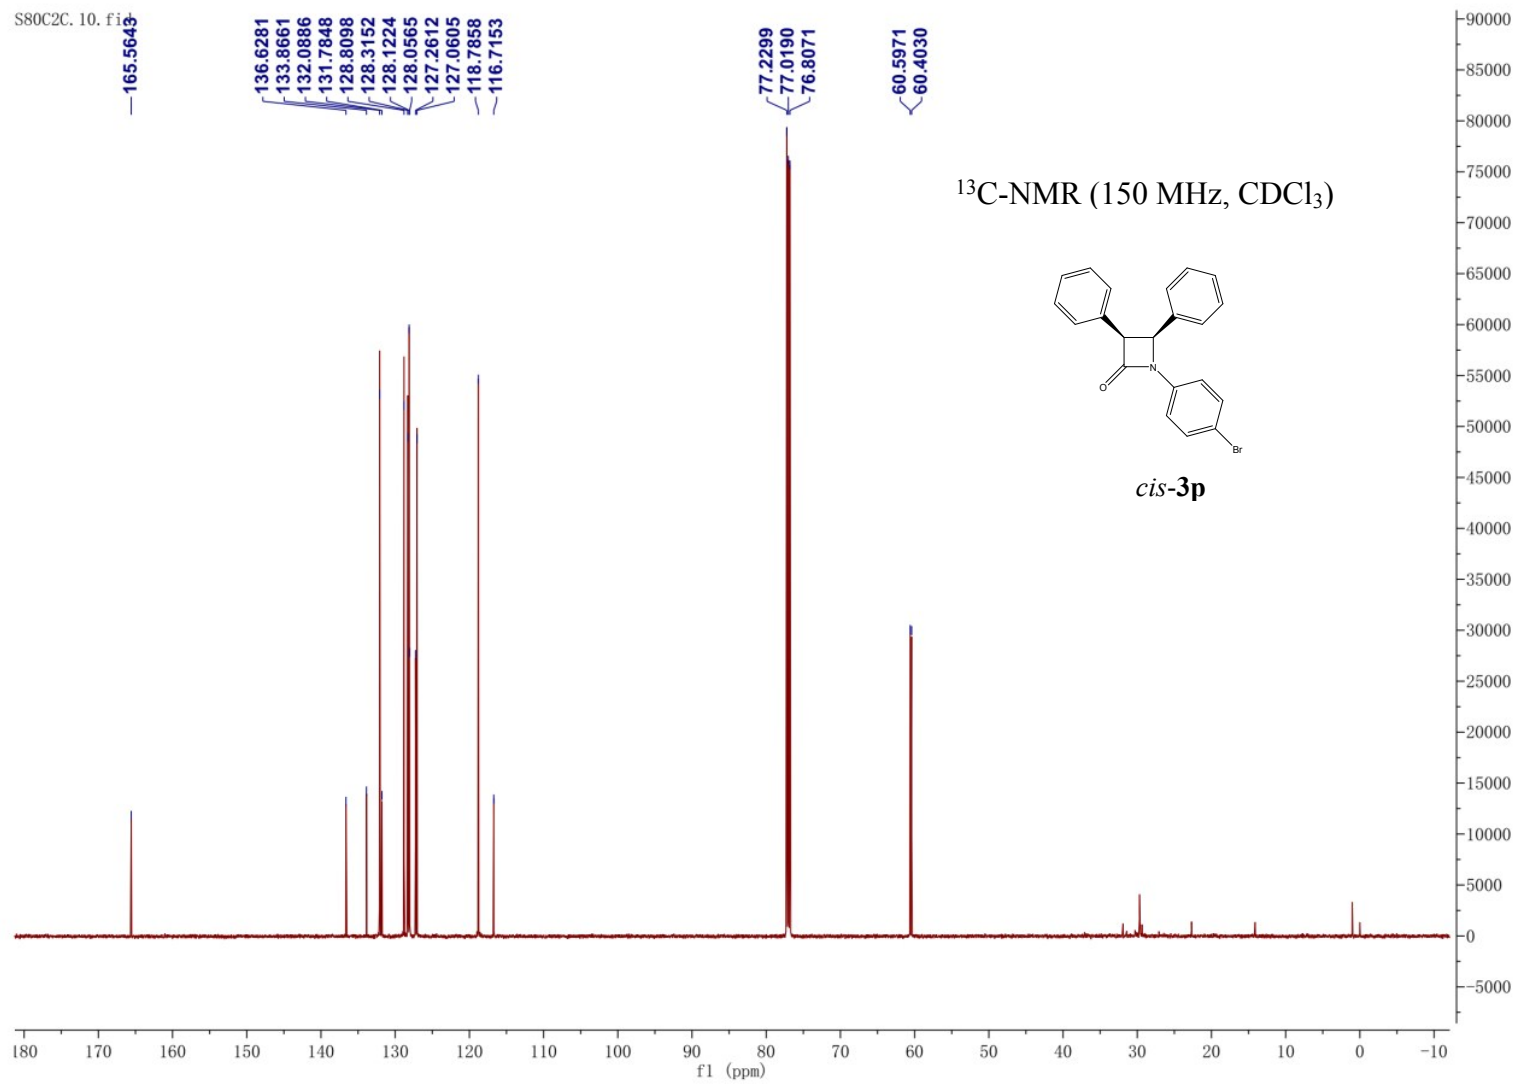

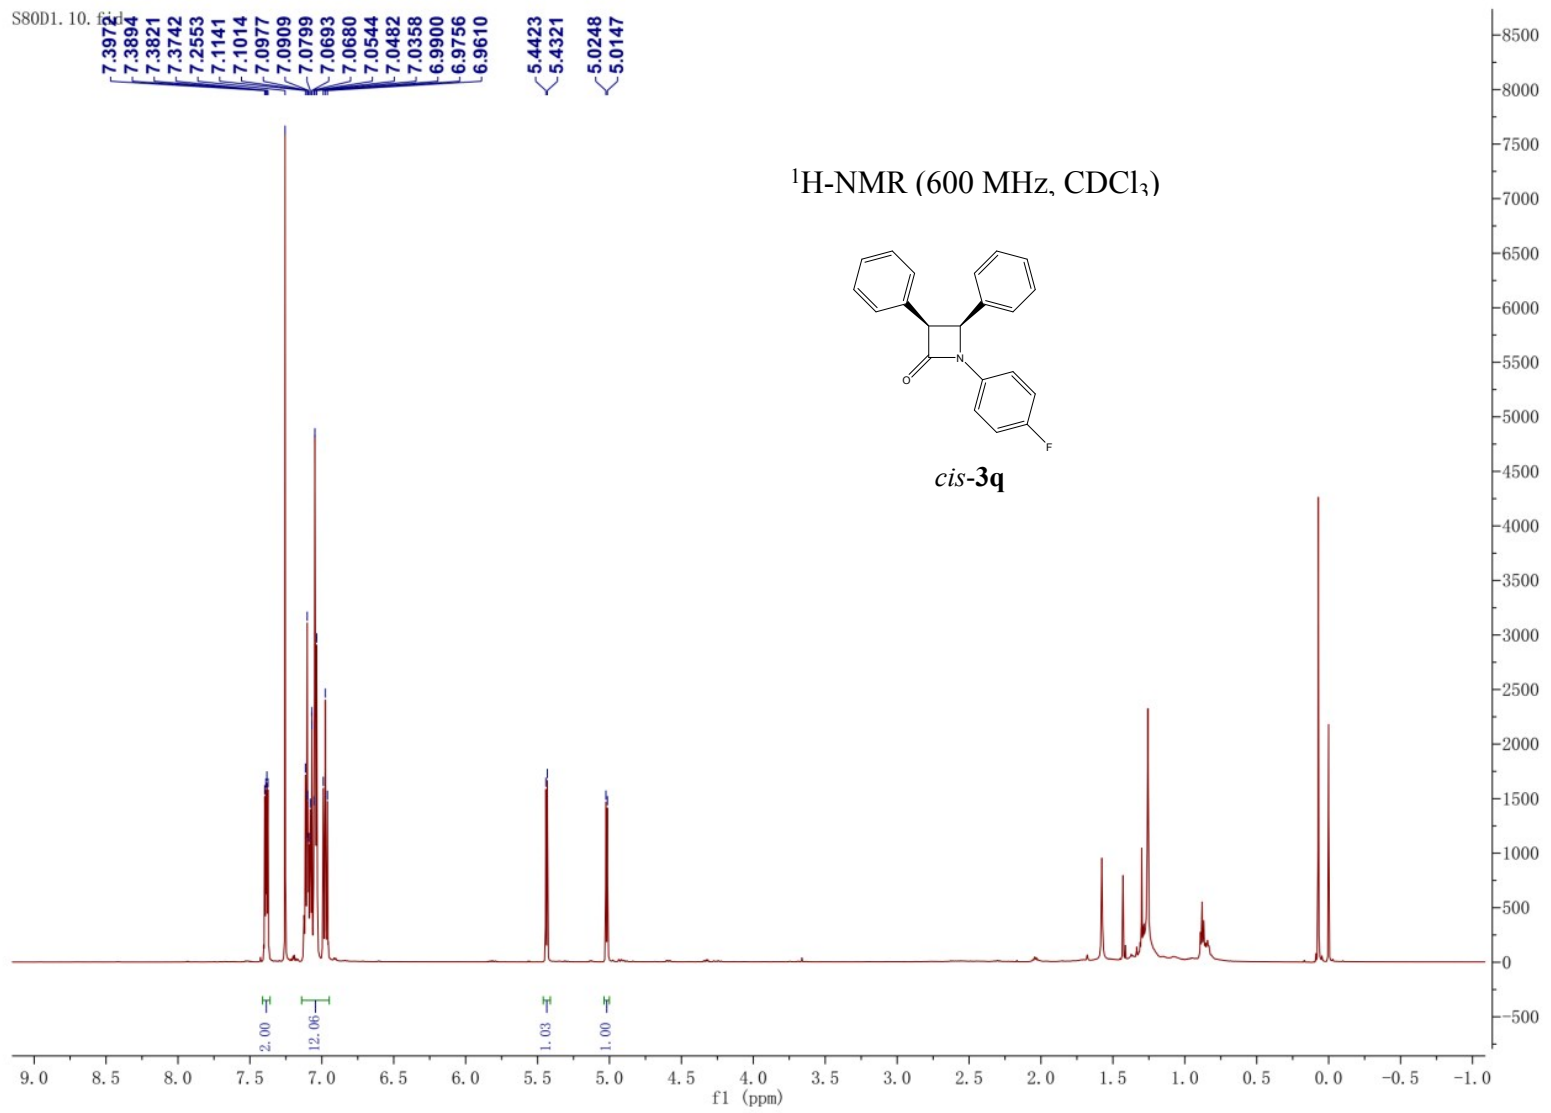



S80D1. 11. fid

165.3356  
159.9091  
158.2947

134.0888  
133.9685  
133.9506  
131.9454  
128.8368  
128.2935  
128.1135  
128.0180  
127.2212  
127.1176  
118.6584  
118.6069  
115.9547  
115.8044

77.2268  
77.0159  
76.8041

60.5266  
60.5085

$^{13}\text{C}$ -NMR (150 MHz,  $\text{CDCl}_3$ )

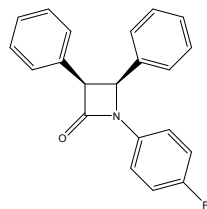

*cis*-3q

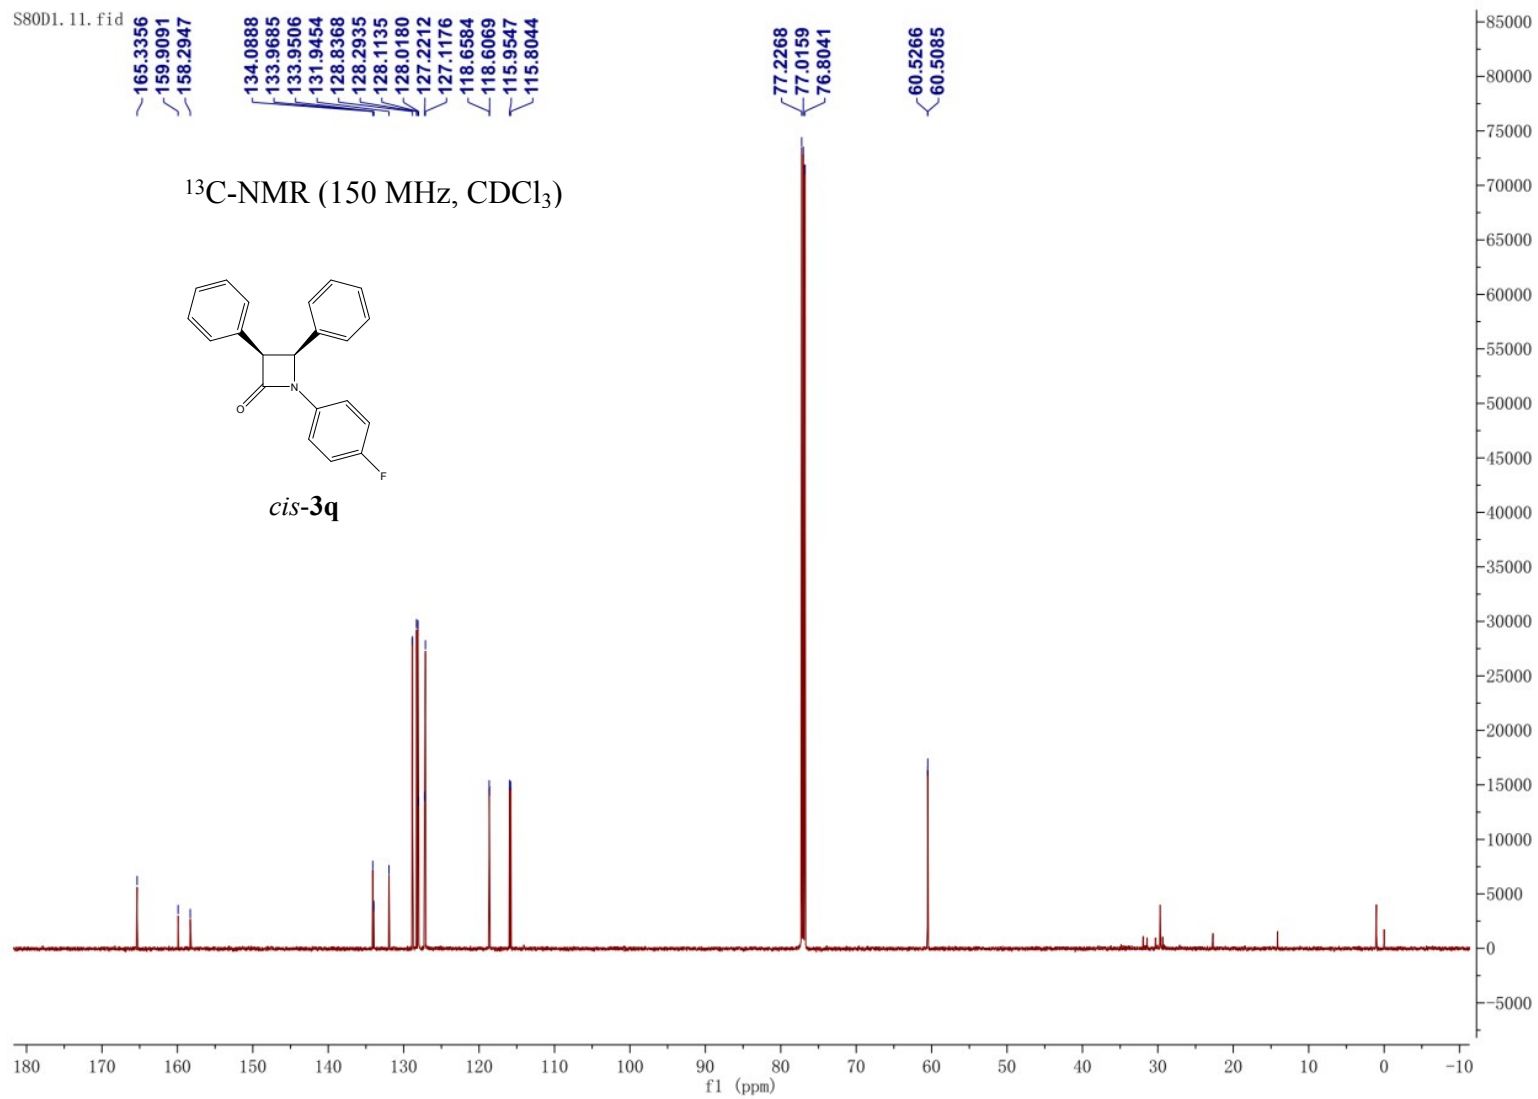

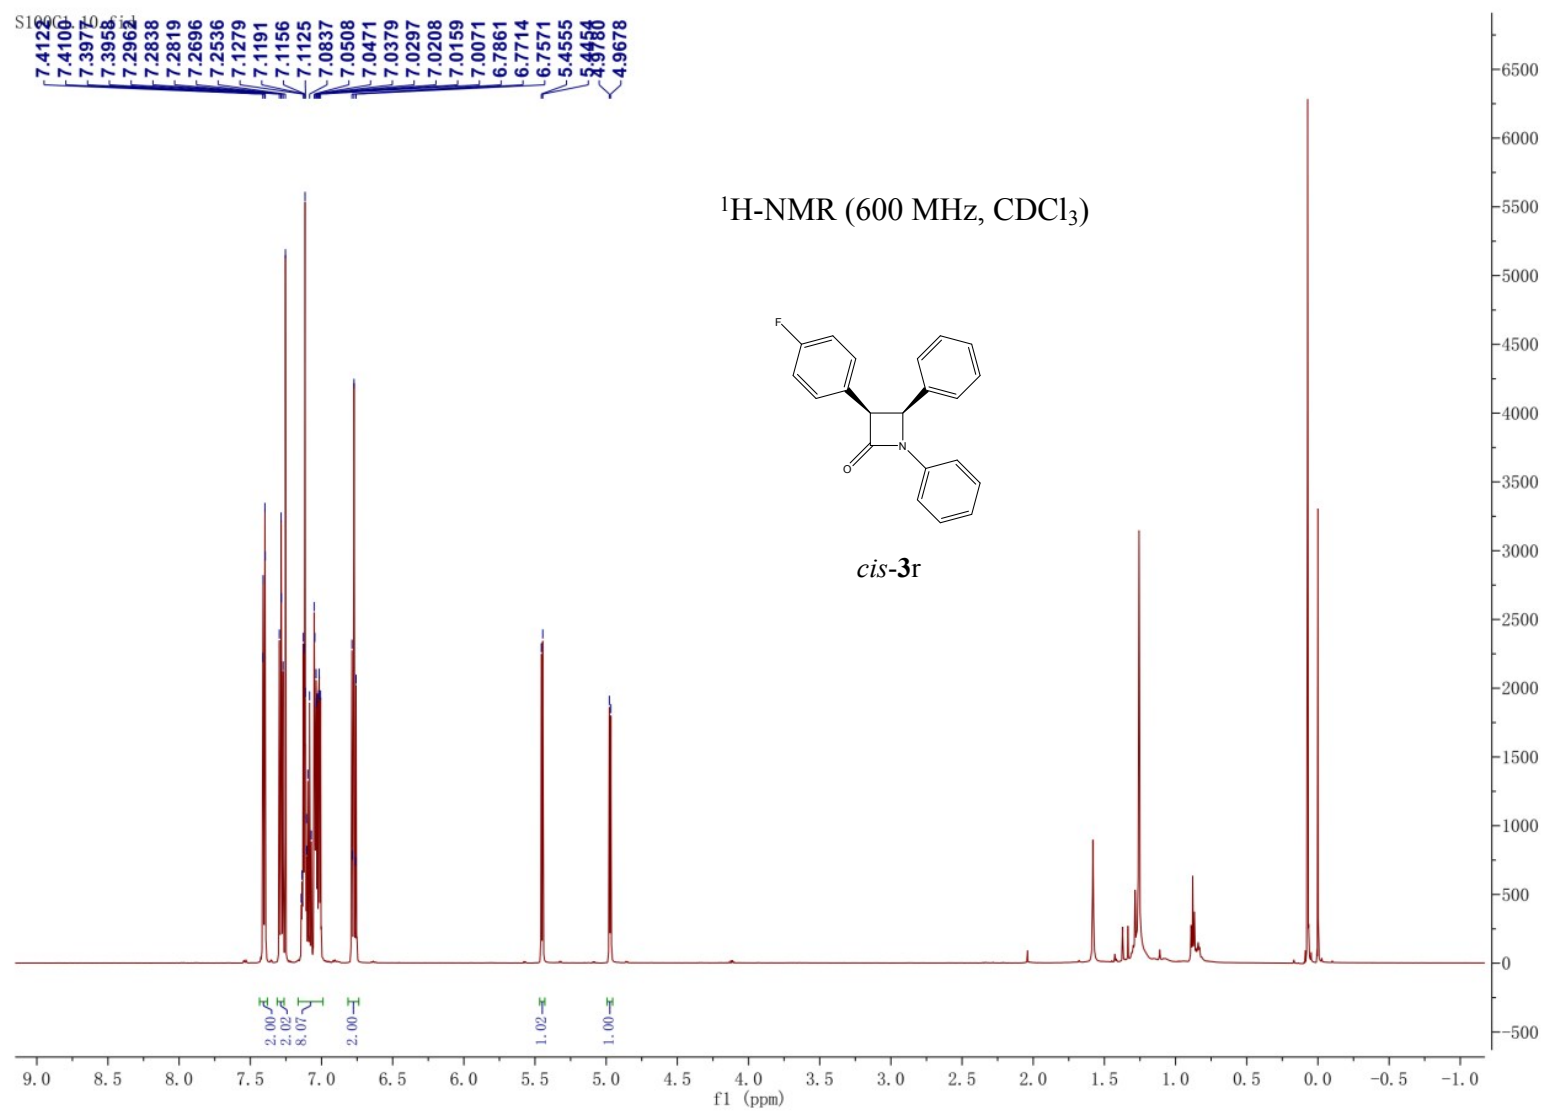

S100C1. 11. fi

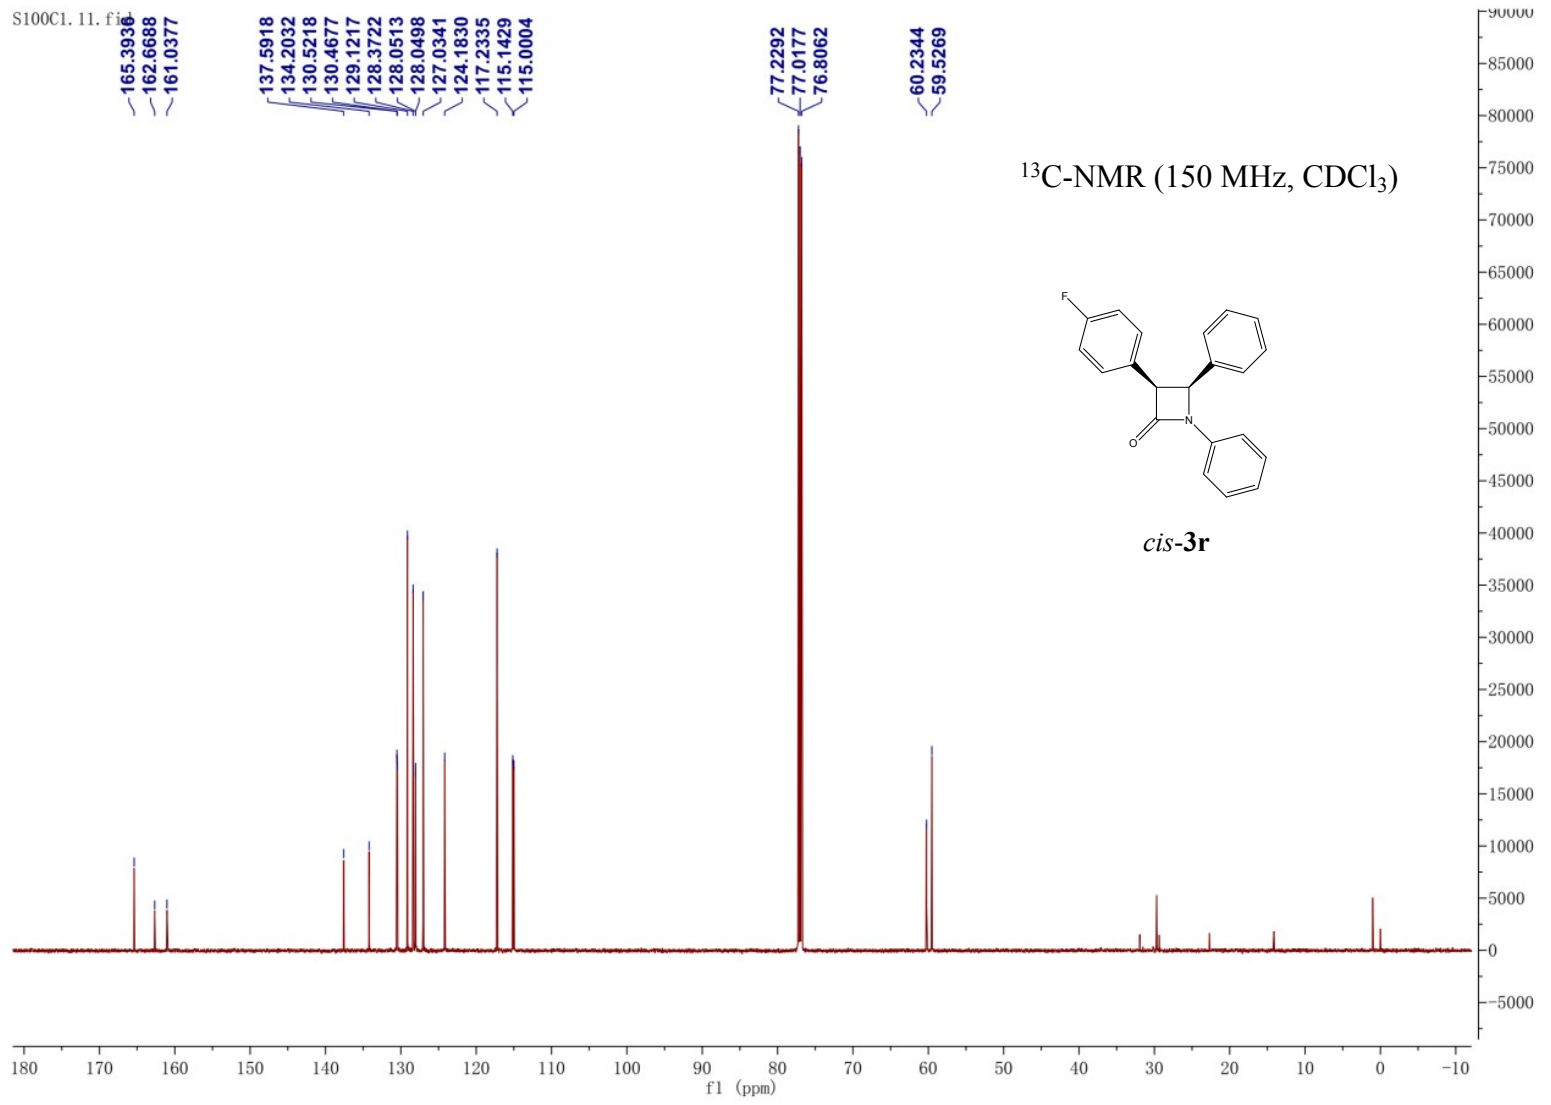

Supplement: d0ra03276j1.pdf [file d0ra03276j1.pdf]
